# Supplementary material for: Water – the best solvent for DMAP-mediated dual cyclization towards metal-free first synthesis of fully substituted phthalimides
Source: Royal Society of Chemistry journal article supplement (doi:10.1039/c6gc00367b), 2016-01-01

## Electronic Supplementary Information

# Water - the best solvent for DMAP mediated dual cyclization towards metal-free first synthesis of fully substituted phthalimide

Subhasis Samai, Debasish Ghosh, Uttam K. Das, Sanghamitra Atta, Saikat K. Manna and  
Dilip K. Maiti\*

Department of Chemistry, University of Calcutta, 92 A. P. C. Road, Kolkata-700009, INDIA

Fax: (+) 91-33-2351-9755, E-mail: [dkmchem@caluniv.ac.in](mailto:dkmchem@caluniv.ac.in)

| <u>Serial No.</u> | <u>Content</u>                                                                    | <u>Page Numbers</u> |
|-------------------|-----------------------------------------------------------------------------------|---------------------|
| 1.                | Materials and method                                                              | S2                  |
| 2.                | Synthesis of <i>N</i> -aryl phthalimides                                          | S2                  |
|                   | <b>2.a.</b> General procedure for synthesis of compounds <b>3a-r</b>              | S2                  |
|                   | <b>2.b.</b> Characterization data of compounds ( <b>3a-r</b> )                    | S2-S7               |
|                   | <b>2.c.</b> General procedure for synthesis of compounds <b>7a-g</b>              | S8                  |
|                   | <b>2.d.</b> Characterization data of compounds ( <b>7a-g</b> )                    | S8-S10              |
| 3.                | <sup>1</sup> H & <sup>13</sup> C NMR of compounds ( <b>3a-r</b> and <b>7a-g</b> ) | S11-S35             |
| 4.                | Crystallographic data of compound <b>3e</b> and <b>3k</b>                         | S36                 |
| 5.                | DLS study of reaction mixture in water medium                                     | S37-S47             |

## 1. Materials and methods

All reagents were purchased from commercial suppliers and used without further purification. Commercially supplied ethyl acetate and petroleum ether were distilled before use. Petroleum ether used in our experiments was in the boiling range of 60-80 °C. Column chromatography was performed on silica gel (100-200 mesh). All the compounds are new and reported melting points are uncorrected. <sup>1</sup>H NMR and <sup>13</sup>C NMR spectra (Bruker Advance 300) were recorded at ambient temperature using 300 MHz spectrometers (300 MHz for <sup>1</sup>H and 75 MHz for <sup>13</sup>C). Chemical shift is reported in ppm from internal reference tetramethylsilane and coupling constant in Hz. Proton multiplicities are represented as s (singlet), d (doublet), t (triplet), q (quartet), and m (multiplet). Infrared spectra were recorded on FT-IR spectrometer (Perkin Elmer Spectrum 100) in thin film. HR-MS data were acquired by electron spray ionization technique on a Q-tof-micro quadrupole mass spectrophotometer (Waters XEVO G2-S QToF). UV data were recorded in Perkin Elmer Lambda 750. X-RAY crystallographic data was taken in Bruker-Apex-II-CCD Diffractometer. DLS (Dynamic Light Scattering) study was done in Zeta sizer Nano ZS90.

## 2. Synthesis of *N*-aryl phthalimides

### 2.a. General procedure of *N*-aryl phthalimides (3a-r)

In a 25 mL round bottom flask 1.0 mmol of acetyl acetanilide (**1**) and 2.2 mmol of dialkyl acetylene dicarboxylate (**2**) were taken in presence of 50 mg (0.15 mmol) of CTAB in 4 mL of H<sub>2</sub>O. Then 1.0 mmol of 4-dimethylaminopyridine (DMAP) was added to it and the reaction mixture was stirred for the stipulated period of time at room temperature. The progress of the reaction was monitored by TLC. To the post-reaction mixture 15 mL of water and 20 mL of DCM were added and taken in a separating funnel. The organic layer was separated and dried over anhydrous Na<sub>2</sub>SO<sub>4</sub>. It was evaporated under reduced pressure and the crude product was purified by column chromatography with silica gel using n-hexane-ethyl acetate as eluent to yield the pure *N*-aryl phthalimides (**3**). The washing water was collected together and removed in a lyophilizer at ambient temperature. The solid residue was dissolved in minimum volume of ethanol. Pure DMAP was crystallized out. M.p. 109-111 °C.

### 2.b. Characterization data of compounds (3a-r)

#### 7-Methyl-1,3-dioxo-2-phenyl-2,3-dihydro-1*H*-isoindole-4,5,6-tricarboxylic acid triethyl ester (**3a**)

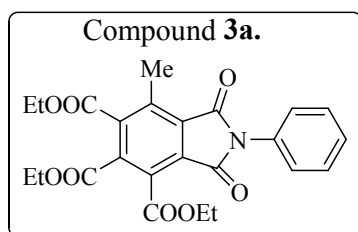

Colourless solid; m.p. 168-170 °C; <sup>1</sup>H NMR (300 MHz, CDCl<sub>3</sub>) δ 7.50 (d, *J* = 7.2 Hz, 2H), 7.41-7.38 (m, 3H), 4.48-4.43 (m, 4H), 4.32 (q, *J* = 6.9 Hz, 2H), 2.79 (s, 3H), 1.42-1.34 (m, 9H); <sup>13</sup>C NMR (75 MHz, CDCl<sub>3</sub>) δ 166.2, 165.8, 164.7, 164.0, 163.9, 142.0, 137.6, 132.4, 131.0, 130.9, 129.8, 129.1, 129.0, 128.7, 128.5, 126.5, 126.4, 62.8, 62.6, 62.3, 14.5, 13.9, 13.8, 13.8; FT-IR (KBr, cm<sup>-1</sup>); 3481, 2984, 2924, 1780, 1719,

1613, 1596, 1496, 1461, 1445; HR-MS (*m/z*) for C<sub>24</sub>H<sub>23</sub>NO<sub>8</sub>: Calculated 453.1424, found 453.1426.

### 7-Methyl-1,3-dioxo-2-phenyl-2,3-dihydro-1*H*-isoindole-4,5,6-tricarboxylic acid triethyl ester (**3b**)

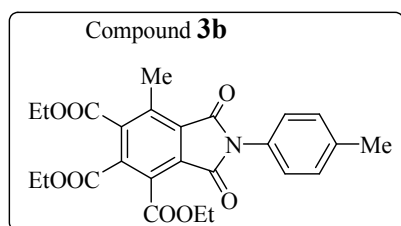

Pale yellow solid; m.p. 196-198 °C; <sup>1</sup>H NMR (300 MHz, CDCl<sub>3</sub>) δ 7.25-7.18 (m, 4H), 4.43-4.36 (m, 4H), 4.33 (q, *J* = 7.2 Hz, 2H), 2.70 (s, 3H), 2.34 (s, 3H), 1.37-1.27 (m, 9H); <sup>13</sup>C NMR (75 MHz, CDCl<sub>3</sub>) δ 166.3, 166.0, 164.8, 164.1, 163.9, 142.0, 138.6, 137.6, 132.3, 131.0, 129.9, 129.8, 129.7, 129.1, 128.3, 126.4, 126.3, 62.8, 62.6, 62.3, 21.2, 14.5, 14.0, 13.8, 13.8; FT-IR (KBr, cm<sup>-1</sup>); 3446, 2982, 2927, 1732, 1604, 1556, 1516, 1466, 1446; HR-MS (*m/z*) for C<sub>25</sub>H<sub>25</sub>NO<sub>8</sub>: Calculated 467.1580, found 467.1581.

### 2-(4-Ethylphenyl)-7-methyl-1,3-dioxo-2,3-dihydro-1*H*-isoindole-4,5,6-tricarboxylic acid triethyl ester (**3c**)

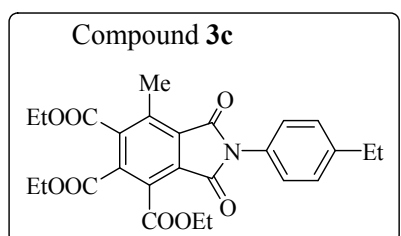

Pale yellow solid; m.p. 124-126 °C; <sup>1</sup>H NMR (300 MHz, CDCl<sub>3</sub>) δ 7.24-7.16 (m, 4H), 4.40-4.23 (m, 6H), 2.67 (s, 3H), 2.63 (q, *J* = 7.5 Hz, 2H), 1.31-1.24 (m, 9H), 1.18 (t, *J* = 7.5 Hz, 3H); <sup>13</sup>C NMR (75 MHz, CDCl<sub>3</sub>) δ 166.2, 165.9, 164.7, 164.1, 163.8, 144.8, 141.9, 137.5, 130.9, 129.6, 129.0, 128.6, 128.3, 126.4, 62.8, 62.5, 62.3, 28.5, 15.3, 14.4, 13.9, 13.8, 13.7; FT-IR (KBr, cm<sup>-1</sup>); 3435, 2973, 2936, 2873, 1777, 1735, 1720, 1636, 1616, 1515, 1468, 1445; HR-MS (*m/z*) for C<sub>26</sub>H<sub>27</sub>NO<sub>8</sub>: Calculated 481.1737, found 481.1734.

### 2-(4-Chlorophenyl)-7-methyl-1,3-dioxo-2,3-dihydro-1*H*-isoindole-4,5,6-tricarboxylic acid triethyl ester (**3d**)

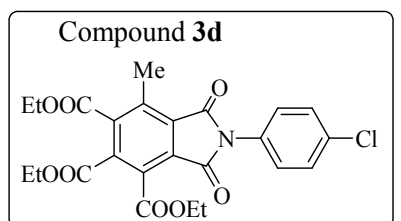

Pale yellow solid; m.p. 178-180 °C; <sup>1</sup>H NMR (300 MHz, DMSO-d<sub>6</sub>) δ 7.50-7.48 (m, 2H), 7.37-7.34 (m, 2H), 4.29-4.18 (m, 6H), 2.56 (s, 3H), 1.22-1.06 (m, 9H); <sup>13</sup>C NMR (75 MHz, DMSO-d<sub>6</sub> + CDCl<sub>3</sub>) δ 164.9, 163.5, 163.1, 139.4, 136.0, 132.4, 131.4, 131.2, 129.7, 128.7, 128.5, 128.4, 127.4, 62.2, 61.7, 61.5, 13.6, 13.1, 13.1, 12.9; FT-IR (KBr, cm<sup>-1</sup>); 3442, 2984, 2935, 2902, 1781, 1737, 1722, 1614, 1589, 1492, 1476; HR-MS (*m/z*) for C<sub>24</sub>H<sub>22</sub>ClNO<sub>8</sub>: Calculated 487.1034, found 487.1039 (One of the major peaks).

### 2-(4-Methoxyphenyl)-7-methyl-1,3-dioxo-2,3-dihydro-1*H*-isoindole-4,5,6-tricarboxylic acid triethyl ester (**3e**)

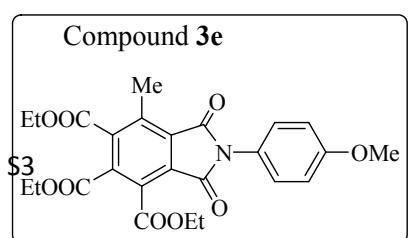

Yellow solid; m.p. 146-148 °C; <sup>1</sup>H NMR (300 MHz, CDCl<sub>3</sub>) δ 7.18 (d, *J* = 8.7 Hz, 2H), 6.88 (d, *J* = 9.0 Hz, 2H), 4.37-4.20 (m, 6H), 3.70 (s, 3H), 2.63 (s, 3H), 1.31-1.21 (m, 9H);

$^{13}\text{C}$  NMR (75 MHz,  $\text{CDCl}_3$ )  $\delta$  166.0, 165.9, 164.6, 164.1, 163.8, 159.4, 141.7, 137.3, 132.1, 130.8, 129.4, 129.0, 127.7, 123.4, 114.3, 62.6, 62.5, 62.4, 55.3, 14.3, 13.8, 13.7, 13.6; FT-IR (KBr,  $\text{cm}^{-1}$ ) 3443, 2981, 2940, 2843, 1778, 1738, 1721, 1615, 1558, 1515, 1467; HR-MS ( $m/z$ ) for  $\text{C}_{25}\text{H}_{25}\text{NO}_9$ : Calculated 483.1529, found 483.1525.

**7-Methyl-2-(4-nitrophenyl)-1,3-dioxo-2,3-dihydro-1*H*-isoindole-4,5,6-tricarboxylic acid triethyl ester (3f)**

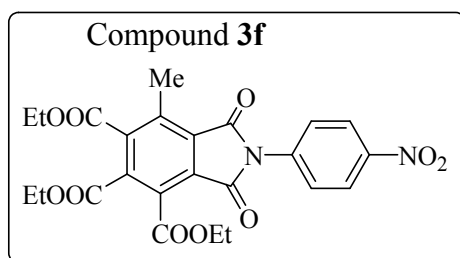

Pale yellow solid; m.p. 193-194 °C;  $^1\text{H}$  NMR (300 MHz,  $\text{CDCl}_3$ )  $\delta$  8.41 (d,  $J = 9$  Hz, 2H), 7.78 (d,  $J = 9$  Hz, 2H), 4.53-4.38 (m, 6H), 2.82 (s, 3H), 1.48-1.34 (m, 9H);  $^{13}\text{C}$  NMR (75 MHz,  $\text{CDCl}_3$ )  $\delta$  165.9, 164.9, 164.2, 163.6, 163.0, 151.6, 146.6, 142.5, 142.3, 138.1, 136.6, 130.3, 130.0, 128.5, 126.5, 124.5, 124.3, 62.9, 62.6, 62.4, 14.5, 13.9, 13.8, 13.7; FT-IR (KBr,  $\text{cm}^{-1}$ ) 3415, 2985, 2937, 1780, 1735, 1637, 1611, 1595, 1528, 1509; HR-MS ( $m/z$ ) for  $\text{C}_{24}\text{H}_{22}\text{N}_2\text{O}_{10}$ : Calculated 498.1274, found 498.1272.

**2-(4-Bromophenyl)-7-methyl-1,3-dioxo-2,3-dihydro-1*H*-isoindole-4,5,6-tricarboxylic acid triethyl ester (3g)**

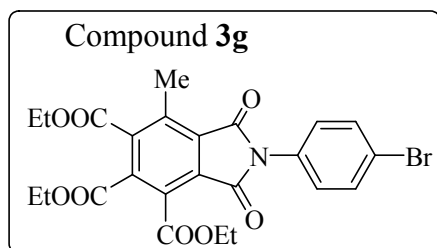

Colourless solid; m.p. 168-170 °C;  $^1\text{H}$  NMR (300 MHz,  $\text{CDCl}_3$ )  $\delta$  7.64 (d, 2H,  $J = 8.4$  Hz), 7.33 (d, 2H,  $J = 8.7$  Hz), 4.51-4.34 (m, 6H), 2.77 (s, 3H), 1.42-1.34 (m, 9H);  $^{13}\text{C}$  NMR (75 MHz,  $\text{CDCl}_3$ )  $\delta$  166.1, 165.5, 164.6, 163.8, 163.7, 142.2, 137.8, 132.5, 132.8, 130.7, 130.0, 129.9, 128.8, 127.9, 122.3, 62.9, 62.6, 62.4, 14.5, 13.9, 13.8, 13.7; FT-IR (KBr,  $\text{cm}^{-1}$ ) 3440, 2986, 2939, 2904, 1780, 1738, 1721, 1613, 1588, 1492; HR-MS ( $m/z$ ) for  $\text{C}_{24}\text{H}_{22}\text{BrNO}_8$ : Calculated 531.0529, found 531.0530 (One of the major peaks).

**2-(4-Isopropylphenyl)-7-methyl-1,3-dioxo-2,3-dihydro-1*H*-isoindole-4,5,6-tricarboxylic acid triethyl ester (3h)**

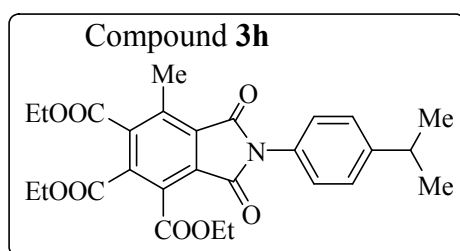

Pale yellow solid; m.p. 142-143 °C;  $^1\text{H}$  NMR (300 MHz,  $\text{CDCl}_3$ )  $\delta$  7.26-7.16 (m, 4H), 4.40-4.23 (m, 6H), 2.92-2.83 (m, 1H), 2.67 (s, 3H), 1.31-1.23 (m, 9H), 1.17 (d,  $J = 6.9$  Hz, 6H);  $^{13}\text{C}$  NMR (75 MHz,  $\text{CDCl}_3$ )  $\delta$  166.1, 165.8, 164.6, 164.0, 163.5, 149.2, 141.8, 137.4, 132.0, 130.8, 129.5, 128.9, 128.3, 127.1, 126.2, 62.6, 62.4, 62.1, 33.7, 23.6, 14.3, 13.8, 13.7, 13.6; FT-IR

(KBr,  $\text{cm}^{-1}$ ) 3451, 2986, 2963, 1778, 1741, 1723, 1637, 1615, 1519, 1504, 1458; HR-MS ( $m/z$ ) for  $\text{C}_{27}\text{H}_{29}\text{NO}_8$  495.1893, found 495.1897.

**2-(4-Benzoylphenyl)-7-methyl-1,3-dioxo-2,3-dihydro-1H-isoindole-4,5,6-tricarboxylic acid triethyl ester (3i)**

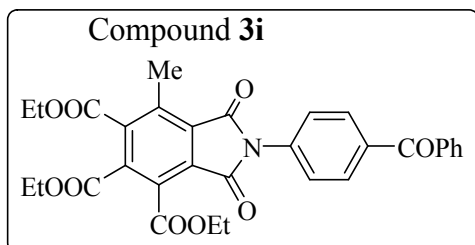

Pale yellow solid; m.p. 203-204 °C;  $^1\text{H}$  NMR (300 MHz,  $\text{CDCl}_3$ )  $\delta$  8.00 (d,  $J = 8.4$  Hz, 2H), 7.88 (d,  $J = 7.8$  Hz, 2H), 7.66 (d,  $J = 7.8$  Hz, 3H), 7.57-7.52 (m, 2H), 4.54-4.39 (m, 6H), 2.84 (s, 3H), 1.48-1.30 (m, 9H);  $^{13}\text{C}$  NMR (75 MHz,  $\text{CDCl}_3$ )  $\delta$  195.9, 166.1, 165.4, 164.3, 163.8, 163.1, 151.7, 142.6, 137.9, 137.1, 134.6, 132.6, 130.8, 130.7, 130.0, 128.4, 126.9, 126.0,

62.8, 62.7, 62.4, 14.6, 14.0, 13.8, 13.8; FT-IR (KBr,  $\text{cm}^{-1}$ ) 3445, 2981, 2935, 1720, 1655, 1603, 1576, 1511, 1467, 1448; HR-MS ( $m/z$ ) for  $\text{C}_{31}\text{H}_{27}\text{NO}_9$ : Calculated 557.1686, found 557.1690.

**2-(3,5-Dimethylphenyl)-7-methyl-1,3-dioxo-2,3-dihydro-1H-isoindole-4,5,6-tricarboxylic acid triethyl ester (3j)**

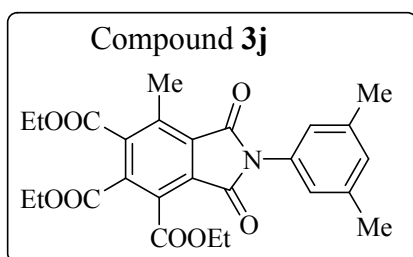

Pale yellow solid; m.p. 170-171 °C;  $^1\text{H}$  NMR (300 MHz,  $\text{CDCl}_3$ )  $\delta$  7.04 (s, 1H), 6.97 (s, 2H), 4.41-4.35 (m, 6H), 2.76 (s, 3H), 2.35 (s, 6H), 1.41-1.33 (m, 9H)  $^{13}\text{C}$  NMR (75 MHz,  $\text{CDCl}_3$ )  $\delta$  166.3, 166.1, 164.8, 164.2, 163.9, 142.0, 139.0, 137.5, 131.0, 130.7, 130.5, 129.7, 124.4, 62.8, 62.6, 62.3, 21.2, 14.5, 14.0, 13.8, 13.8; FT-IR (KBr,  $\text{cm}^{-1}$ ) 3434, 2980, 2923, 1737, 1725, 1721, 1642, 1617, 1476, 1444;

HR-MS ( $m/z$ ) for  $\text{C}_{26}\text{H}_{27}\text{NO}_8$ : Calculated 481.1737, found 481.1734.

**7-Methyl-1,3-dioxo-2-phenyl-2,3-dihydro-1H-isoindole-4,5,6-tricarboxylic acid trimethyl ester (3k)**

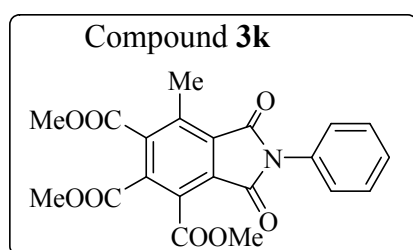

Light brown solid; m.p. 189-190 °C;  $^1\text{H}$  NMR (300 MHz,  $\text{CDCl}_3$ )  $\delta$  7.51 (d,  $J = 7.5$  Hz, 2H), 7.45 (t,  $J = 9.0$  Hz, 3H), 4.01 (s, 3H), 3.98 (s, 3H), 3.92 (s, 3H), 2.78 (s, 3H);  $^{13}\text{C}$  NMR (75 MHz,  $\text{CDCl}_3$ )  $\delta$  166.6, 165.7, 165.2, 164.1, 164.0, 141.8, 137.9, 132.0, 131.1, 130.9, 129.5, 129.2, 129.1, 128.8, 128.5, 126.5, 53.4, 53.3, 53.0, 14.5; FT-IR (KBr,  $\text{cm}^{-1}$ ) 3417, 2953, 2924, 2853, 1783, 1741, 1638,

1618, 1597, 1492; HR-MS ( $m/z$ ) for  $\text{C}_{21}\text{H}_{17}\text{NO}_8$ : Calculated 411.0954, found 411.0956.

**7-Methyl-2-naphthalen-1-yl-1,3-dioxo-2,3-dihydro-1H-isoindole-4,5,6-tricarboxylic acid trimethyl ester (3l)**

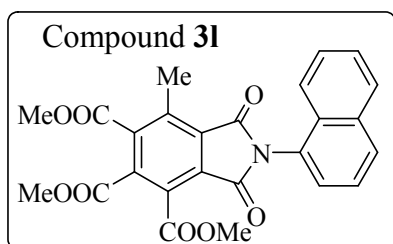

Light brown solid; m.p. 208-210 °C;  $^1\text{H}$  NMR (300 MHz,  $\text{CDCl}_3$ )  $\delta$  8.00-7.92 (m, 2H), 7.59-7.51 (m, 4H), 7.45-7.42 (m, 1H), 3.99-3.97 (m, 6H), 3.93-3.92 (m, 3H), 2.80 (s, 3H);  $^{13}\text{C}$  NMR (75 MHz,  $\text{CDCl}_3$ )  $\delta$  166.6, 166.1, 165.1, 164.3, 164.2, 141.9, 138.1, 134.3, 132.1, 131.3, 130.2, 129.9, 129.6, 129.5, 128.5, 127.3, 126.8, 126.6, 125.2, 122.0, 53.5, 53.3, 53.1, 14.6; FT-IR (KBr,  $\text{cm}^{-1}$ ) 3415, 2924, 2853, 1745, 1723, 1638, 1616, 1597, 1511; HR-MS ( $m/z$ ) for  $\text{C}_{25}\text{H}_{19}\text{NO}_8$ : Calculated 461.1111, found 461.1110.

**2-(4-Methoxyphenyl)-7-methyl-1,3-dioxo-2,3-dihydro-1H-isoindole-4,5,6-tricarboxylic acid trimethyl ester (3m)**

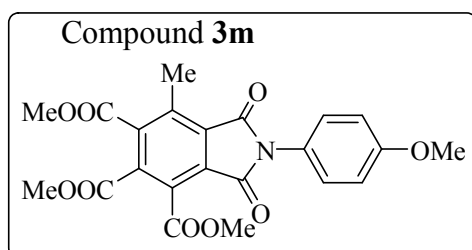

Brown solid; m.p. 169-170 °C;  $^1\text{H}$  NMR (300 MHz,  $\text{CDCl}_3$ )  $\delta$  7.23 (d,  $J$  = 4.5 Hz, 2H), 6.97 (d, 2H,  $J$  = 9.0 Hz), 3.95 (s, 3H), 3.92 (s, 3H), 3.86 (s, 3H), 3.79 (s, 3H), 2.71 (s, 3H);  $^{13}\text{C}$  NMR (75 MHz,  $\text{CDCl}_3$ )  $\delta$  166.7, 166.0, 165.2, 164.2, 164.2, 159.5, 141.8, 137.9, 131.9, 131.2, 129.4, 129.3, 127.8, 123.4, 114.5, 55.5, 53.5, 53.4, 53.3, 14.5; FT-IR (KBr,  $\text{cm}^{-1}$ ) 3467, 3414, 2953, 2924, 2852, 1740, 1720, 1637, 1617, 1514; HR-MS ( $m/z$ ) for  $\text{C}_{22}\text{H}_{19}\text{NO}_9$ : Calculated 441.1060, found 441.1069.

**2-(4-Bromophenyl)-7-methyl-1,3-dioxo-2,3-dihydro-1H-isoindole-4,5,6-tricarboxylic acid trimethyl ester (3n)**

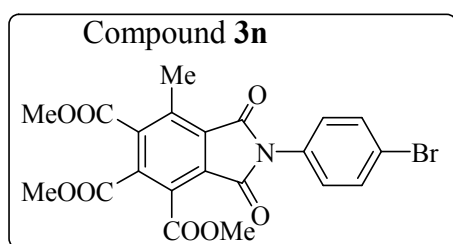

Brown solid; m.p. 196-197 °C;  $^1\text{H}$  NMR (300 MHz,  $\text{CDCl}_3$ )  $\delta$  7.62 (d,  $J$  = 8.7 Hz, 2H), 7.30 (d,  $J$  = 8.7 Hz, 2H), 3.97 (s, 3H), 3.94 (s, 3H), 3.89 (s, 3H), 2.73 (s, 3H);  $^{13}\text{C}$  NMR (75 MHz,  $\text{CDCl}_3$ )  $\delta$  166.5, 165.3, 165.0, 164.1, 163.6, 141.9, 138.0, 132.3, 132.1, 130.9, 129.9, 129.5, 129.1, 127.8, 127.6, 122.3, 53.5, 53.3, 53.1, 14.6; FT-IR (KBr,  $\text{cm}^{-1}$ ) 3452, 3416, 2953, 2923, 2852, 1783, 1736, 1723, 1638, 1615; HR-MS ( $m/z$ ) for  $\text{C}_{21}\text{H}_{16}\text{BrNO}_8$ : Calculated 489.0059, found 489.0061 (One of the major peaks).

**7-Methyl-2-(4-nitrophenyl)-1,3-dioxo-2,3-dihydro-1H-isoindole-4,5,6-tricarboxylic acid trimethyl ester (3o)**

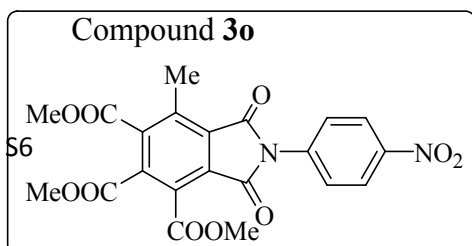

Light brown solid; m.p. 186-188 °C;  $^1\text{H}$  NMR (300 MHz,  $\text{CDCl}_3$ )  $\delta$  8.37 (d,  $J$  = 9.0 Hz, 2H), 7.72 (d,  $J$  = 9.0 Hz, 2H), 3.97 (s, 3H), 3.83 (s, 3H), 3.97 (s, 3H),

2.77 (s, 3H),  $^{13}\text{C}$  NMR (75 MHz,  $\text{CDCl}_3$ )  $\delta$  166.4, 164.9, 164.0, 163.2, 146.8, 142.3, 138.4, 136.6, 132.6, 130.6, 129.9, 128.8, 126.5, 124.4, 53.6, 53.4, 53.2, 14.7; FT-IR (KBr,  $\text{cm}^{-1}$ ) 3412, 2961, 2924, 2853, 1741, 1639, 1614, 1598, 1527, 1500; HR-MS ( $m/z$ ) for  $\text{C}_{21}\text{H}_{16}\text{N}_2\text{O}_{10}$ : Calculated 456.0805, found 456.0806.

**2-(4-Bromo-3-methylphenyl)-7-methyl-1,3-dioxo-2,3-dihydro-1*H*-isoindole-4,5,6-tricarboxylic acid trimethyl ester (3p)**

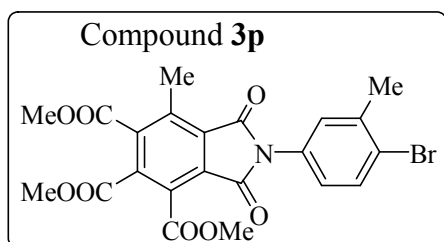

Light brown solid; m.p. 162-163 °C;  $^1\text{H}$  NMR (300 MHz,  $\text{CDCl}_3$ )  $\delta$  7.65 (d,  $J = 8.4$  Hz, 1H), 7.28 (s, 1H), 7.11-7.08 (m, 1H), 4.00 (s, 3H), 3.97 (s, 3H), 3.91 (s, 3H), 2.75 (s, 3H), 2.42 (s, 3H);  $^{13}\text{C}$  NMR (75 MHz,  $\text{CDCl}_3$ )  $\delta$  165.6, 164.5, 164.1, 163.1, 162.8, 140.9, 138.2, 137.0, 132.0, 130.0, 129.0, 128.5, 128.1, 127.5, 124.3, 124.0, 52.5, 52.4, 52.1, 22.0, 13.6; FT-IR (KBr,  $\text{cm}^{-1}$ ) 3419, 2952, 2923, 2852, 1779, 1734, 1722, 1638, 1617, 1447; HR-MS ( $m/z$ ) for  $\text{C}_{22}\text{H}_{18}\text{BrNO}_8$ : Calculated 503.0216, found 503.0219 (One of the major peaks).

**2-(4-Isopropylphenyl)-7-methyl-1,3-dioxo-2,3-dihydro-1*H*-isoindole-4,5,6-tricarboxylic acid trimethyl ester (3q)**

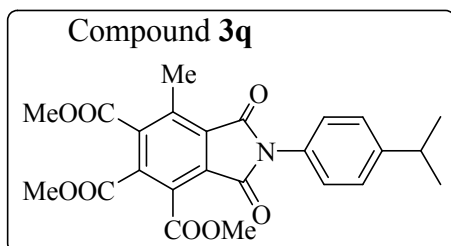

White solid; m.p. 168-169 °C;  $^1\text{H}$  NMR (300 MHz,  $\text{CDCl}_3$ )  $\delta$  7.27-7.16 (m, 4H), 3.90 (s, 3H), 3.87 (s, 3H), 3.81 (s, 3H), 2.90-2.81 (m, 1H), 2.66 (s, 3H), 1.18 (d,  $J = 6.9$  Hz, 6H);  $^{13}\text{C}$  NMR (75 MHz,  $\text{CDCl}_3$ )  $\delta$  166.7, 165.8, 165.2, 164.2, 149.5, 141.8, 137.8, 131.1, 129.4, 129.3, 128.3, 127.2, 126.3, 53.5, 53.3, 53.1, 33.9, 23.8, 14.5; FT-IR (KBr,  $\text{cm}^{-1}$ ) 3458, 2959, 2927, 2872, 1740, 1717, 1635, 1516, 1440; HR-MS ( $m/z$ ) for  $\text{C}_{24}\text{H}_{23}\text{NO}_8$ : 453.1424, found 453.1422.

**2-(4-Ethylphenyl)-7-methyl-1,3-dioxo-2,3-dihydro-1*H*-isoindole-4,5,6-tricarboxylic acid trimethyl ester (3r)**

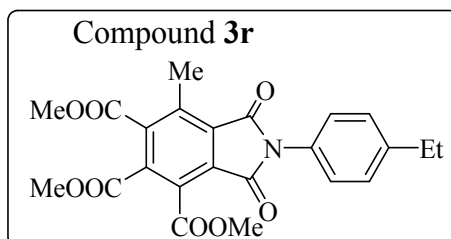

White solid; m.p. 165-166 °C;  $^1\text{H}$  NMR (300 MHz,  $\text{CDCl}_3$ )  $\delta$  7.33-7.26 (m, 4H), 3.98 (s, 3H), 3.95 (s, 3H), 3.90 (s, 3H), 2.75 (s, 3H), 2.72 (q,  $J = 7.8$  Hz, 2H), 1.27 (t,  $J = 7.8$  Hz, 3H);  $^{13}\text{C}$  NMR (75 MHz,  $\text{CDCl}_3$ )  $\delta$  166.7, 165.8, 165.2, 164.2, 144.9, 141.8, 137.8, 131.2, 129.4, 129.3, 128.6, 128.3, 126.4, 53.4, 53.3, 53.1, 28.5, 15.3, 14.6; FT-IR (KBr,  $\text{cm}^{-1}$ ) 3418, 2955, 2922, 2851, 1740, 1720, 1637, 1618, 1515, 1438; HR-MS ( $m/z$ ) for  $\text{C}_{23}\text{H}_{21}\text{NO}_8$ : Calculated 439.1267, found 439.1261.

## 2.c. General procedure of *N*-aryl biarylimides (7a-g)

In a 25 mL round bottom flask 1.0 mmol of benzoyl acetanilide (6) and 2.2 mmol of dialkyl acetylene dicarboxylate (2) were taken in presence of 50 mg (0.15 mmol) of CTAB in 4 mL of H<sub>2</sub>O. Then 1.0 mmol of 4-dimethylaminopyridine (DMAP) was added to it and the reaction mixture was stirred for the stipulated period of time at room temperature. The progress of the reaction was monitored by TLC. To the post-reaction mixture 15 mL of water and 20 mL of DCM were added and taken in a separating funnel. The organic layer was separated and dried over anhydrous Na<sub>2</sub>SO<sub>4</sub>. Solvent was evaporated under reduced pressure and the crude reaction mixture was purified by column chromatography using silica gel and n-hexane-ethyl acetate as eluent to yield the pure product unsymmetrical biarylimides 7.

## 2.d. Characterization data of compound (7a-g)

### 1,3-Dioxo-2,7-diphenyl-2,3-dihydro-1*H*-isoindole-4,5,6-tricarboxylic acid triethyl ester (7a)

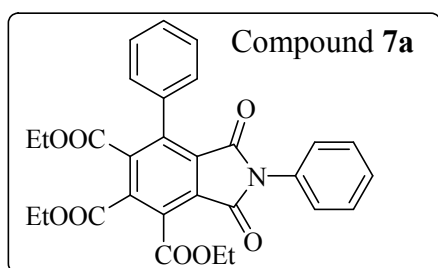

Light brown solid; m.p. 156-158 °C; <sup>1</sup>H NMR (300 MHz, CDCl<sub>3</sub>) δ 7.47-7.32 (m, 10H), 4.56 (q, *J* = 6.9 Hz, 2H), 4.42 (q, *J* = 7.2 Hz, 2H), 4.05 (q, *J* = 7.2 Hz, 2H), 1.45-1.30 (m, 6H), 0.96 (t, *J* = 7.2 Hz, 3H); <sup>13</sup>C NMR (75 MHz, CDCl<sub>3</sub>) δ 165.7, 164.6, 164.3, 163.8, 163.7, 141.9, 140.0, 132.6, 131.0, 130.8, 130.5, 129.1, 129.1, 129.0, 128.8, 128.4, 127.9, 126.4, 63.0, 62.7, 62.0, 13.8,

13.7, 13.4; FT-IR (KBr, cm<sup>-1</sup>) 3548, 3418, 2990, 2903, 1785, 1734, 1723, 1638, 1615, 1495; HR-MS (*m/z*) for C<sub>29</sub>H<sub>25</sub>NO<sub>8</sub>: Calculated 515.1580, found 515.1577.

### 1,3-Dioxo-2,7-diphenyl-2,3-dihydro-1*H*-isoindole-4,5,6-tricarboxylic acid trimethyl ester (7b)

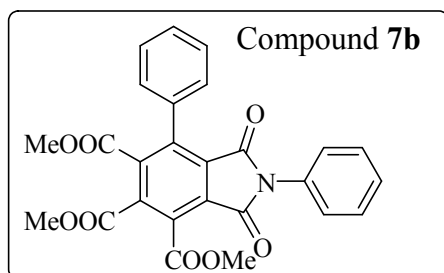

Light brown solid; m.p. 210-212 °C; <sup>1</sup>H NMR (300 MHz, CDCl<sub>3</sub>) δ 7.39-7.35 (m, 4H), 7.30-7.27 (m, 6H), 3.97 (s, 3H), 3.85 (s, 3H), 3.49 (s, 3H); <sup>13</sup>C NMR (75 MHz, CDCl<sub>3</sub>) δ 166.1, 165.1, 164.1, 164.0, 163.8, 141.9, 140.2, 132.4, 132.1, 130.7, 129.4, 129.2, 129.0, 128.8, 128.5, 127.9, 126.4, 53.5, 53.4, 52.7; FT-IR (KBr, cm<sup>-1</sup>) 3443, 2949, 2924, 2854, 1784, 1732, 1613,

1596, 1496; HR-MS (*m/z*) for C<sub>26</sub>H<sub>19</sub>NO<sub>8</sub>: Calculated 473.1111, found 473.1113.



**1,3-Dioxo-7-phenyl-2-p-tolyl-2,3-dihydro-1H-isoindole-4,5,6-tricarboxylic acid triethyl ester (7c)**

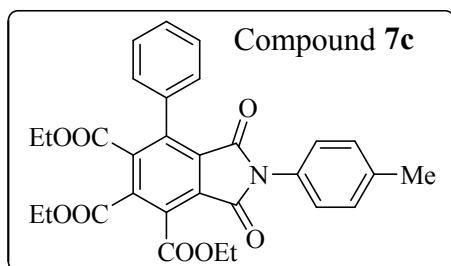

Pale yellow solid; m.p. 138-139 °C; <sup>1</sup>H NMR (300 MHz, CDCl<sub>3</sub>) δ 7.37 (d, *J* = 4.8 Hz, 3H), 7.27-7.23 (m, 2H), 7.19-7.11 (m, 4H), 4.48 (q, *J* = 7.2 Hz, 2H), 4.35 (q, *J* = 7.2 Hz, 2H), 3.98 (q, *J* = 7.2 Hz, 2H), 2.29 (s, 3H), 1.38-1.27 (m, 6H), 0.89 (t, *J* = 7.2 Hz, 3H); <sup>13</sup>C NMR (75 MHz, CDCl<sub>3</sub>) δ 165.7, 164.6, 164.3, 163.9, 163.7, 141.8, 139.9, 138.4, 132.6, 130.5, 129.5, 129.2,

128.9, 128.8, 128.1, 127.8, 126.1, 62.8, 62.6, 61.9, 21.0, 13.8, 13.6, 13.3; FT-IR (KBr, cm<sup>-1</sup>) 3439, 2992, 2962, 2926, 1784, 1738, 1725, 1638, 1516, 1465, 1447; HR-MS (*m/z*) for C<sub>30</sub>H<sub>27</sub>NO<sub>8</sub>: Calculated 529.1737, found 529.1734.

**1,3-Dioxo-7-phenyl-2-p-tolyl-2,3-dihydro-1H-isoindole-4,5,6-tricarboxylic acid trimethyl ester (7d)**

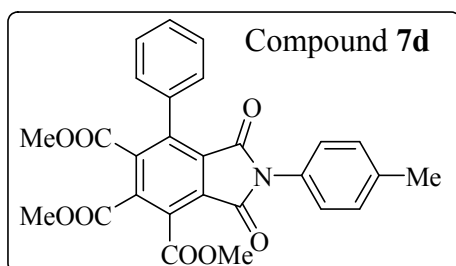

Pale yellow; m.p. 228-230 °C; <sup>1</sup>H NMR (300 MHz, CDCl<sub>3</sub>) δ 7.39-7.37 (m, 3H), 7.28-7.26 (m, 2H), 7.19-7.17 (m, 4H), 4.02 (s, 3H), 3.86 (s, 3H), 3.50 (s, 3H), 2.30 (s, 3H); <sup>13</sup>C NMR (75 MHz, CDCl<sub>3</sub>) δ 166.1, 165.2, 164.2, 164.0, 163.9, 141.8, 140.1, 138.5, 134.3, 132.4, 130.7, 130.6, 129.6, 129.5, 129.1, 128.7, 128.1, 127.9, 126.1, 55.5, 53.4, 52.7, 21.1; FT-IR (KBr, cm<sup>-1</sup>)

3449, 3004, 2950, 1784, 1744, 1734, 1615, 1516, 1448, 1441; HR-MS (*m/z*) for C<sub>27</sub>H<sub>21</sub>NO<sub>8</sub>: Calculated 487.1267, found 487.1263.

**2-(4-Chloro-3-trifluoromethylphenyl)-1,3-dioxo-7-phenyl-2,3-dihydro-1H-isoindole-4,5,6-tricarboxylic acid triethyl ester (7e)**

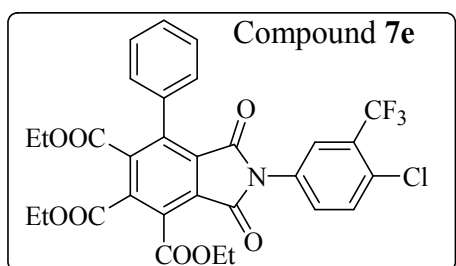

White solid; m.p. 166-168 °C; <sup>1</sup>H NMR (300 MHz, CDCl<sub>3</sub>) δ 7.72 (s, 1H), 7.54-7.44 (m, 2H), 7.40-7.35 (m, 3H), 7.27-7.19 (m, 2H), 4.49 (q, *J* = 7.2 Hz, 2H), 4.36 (q, *J* = 7.2 Hz, 2H), 3.99 (q, *J* = 7.2 Hz, 2H), 1.39-1.27 (m, 6H), 0.90 (t, *J* = 6.9 Hz, 3H); <sup>13</sup>C NMR (75 MHz, CDCl<sub>3</sub>) δ 165.5, 164.4, 163.6, 163.3, 142.3, 140.4, 132.4, 132.1, 131.3, 130.4, 130.1, 129.8, 129.3, 128.8,

128.0, 125.4, 63.1, 62.9, 62.2, 13.8, 13.7, 13.4; FT-IR (KBr, cm<sup>-1</sup>) 3450, 2987, 2942, 2906, 1732, 1723, 1613, 1583, 1485; HR-MS (*m/z*) for C<sub>30</sub>H<sub>23</sub>ClF<sub>3</sub>NO<sub>8</sub>: Calculated 617.1064, found 617.1066 (One of the major peaks).

**2-(4-Chloro-3-trifluoromethylphenyl)-1,3-dioxo-7-phenyl-2,3-dihydro-1H-isoindole-4,5,6-tricarboxylic acid trimethyl ester (7f)**

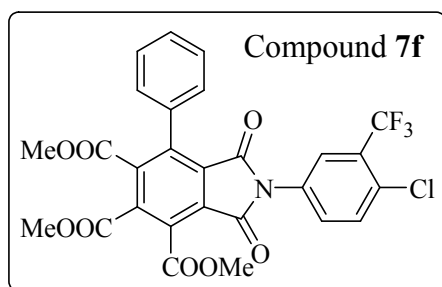

Pale yellow solid; m.p. 126-128 °C; <sup>1</sup>H NMR (300 MHz, CDCl<sub>3</sub>) δ 7.72 (s, 1H), 7.51 (s, 2H), 7.41 (d, *J* = 6.6 Hz, 3H), 7.27-7.19 (m, 2H), 3.98 (s, 3H), 3.86 (s, 3H), 3.51 (s, 3H); <sup>13</sup>C NMR (75 MHz, CDCl<sub>3</sub>) δ 165.8, 164.7, 163.7, 163.4, 163.1, 142.1, 140.5, 131.9, 130.8, 130.2, 129.5, 129.3, 128.9, 128.5, 127.9, 125.3, 125.2, 53.5, 53.4, 52.6; FT-IR (KBr, cm<sup>-1</sup>) 3467, 3411, 2955,

1788, 1733, 1637, 1614, 1485, 1448; HR-MS (*m/z*) for C<sub>27</sub>H<sub>17</sub>ClF<sub>3</sub>NO<sub>8</sub>: Calculated 575.0595, found 575.0591 (One of the major peaks).

**2-(4-Chlorophenyl)-1,3-dioxo-7-phenyl-2,3-dihydro-1H-isoindole-4,5,6-tricarboxylic acid trimethyl ester (7g)**

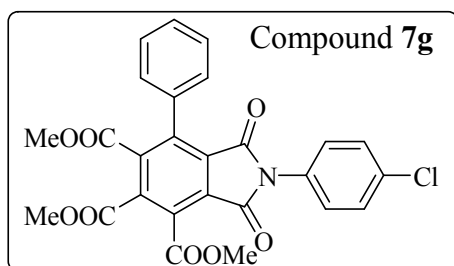

Orange solid; m.p. 184-185 °C; <sup>1</sup>H NMR (300 MHz, CDCl<sub>3</sub>) δ 7.40-7.34 (m, 6H), 7.28-7.25 (m, 2H), 7.20 (s, 1H), 3.98 (s, 3H), 3.86 (s, 3H), 3.50 (s, 3H); <sup>13</sup>C NMR (75 MHz, CDCl<sub>3</sub>) δ 165.9, 164.9, 163.8, 163.7, 163.4, 141.9, 140.2, 134.1, 132.1, 130.7, 130.4, 129.3, 129.2, 129.1, 128.6, 128.3, 128.2, 127.9, 127.8, 127.4, 127.3, 53.4, 53.3, 52.6; FT-IR (KBr, cm<sup>-1</sup>) 3445, 3003, 2951,

2851, 1732, 1639, 1617, 1597, 1495, 1448; HR-MS (*m/z*) for C<sub>26</sub>H<sub>17</sub>ClNO<sub>8</sub>: Calculated 507.0721, found 507.0724 (One of the major peaks).

### 3) <sup>1</sup>H & <sup>13</sup>C NMR of compounds 3a-r & 7a-g

#### <sup>1</sup>H & <sup>13</sup>C NMR of 3a

300 MHz NMR Machine; Department of Chemistry; University of Calcutta; SAP-CAS P  
Sample: SUBH-19R; <sup>1</sup>H; CDCl<sub>3</sub>; Supervisor: Dr. D.K.Maiti; Dt: 15/01/14

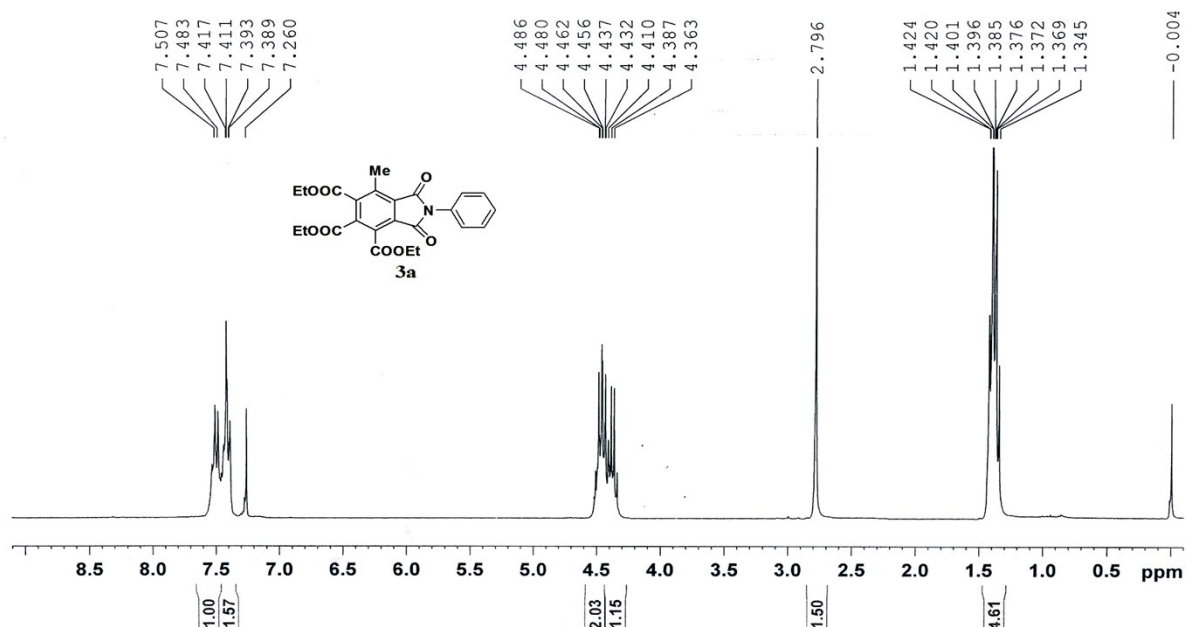

300 MHz NMR Machine; Department of Chemistry; University of Calcutta; SAP-CAS P  
Sample: Subh-19R; <sup>13</sup>C; CDCl<sub>3</sub>; Supervisor: Dr. D. K. Maiti; Dt: 14/01/14

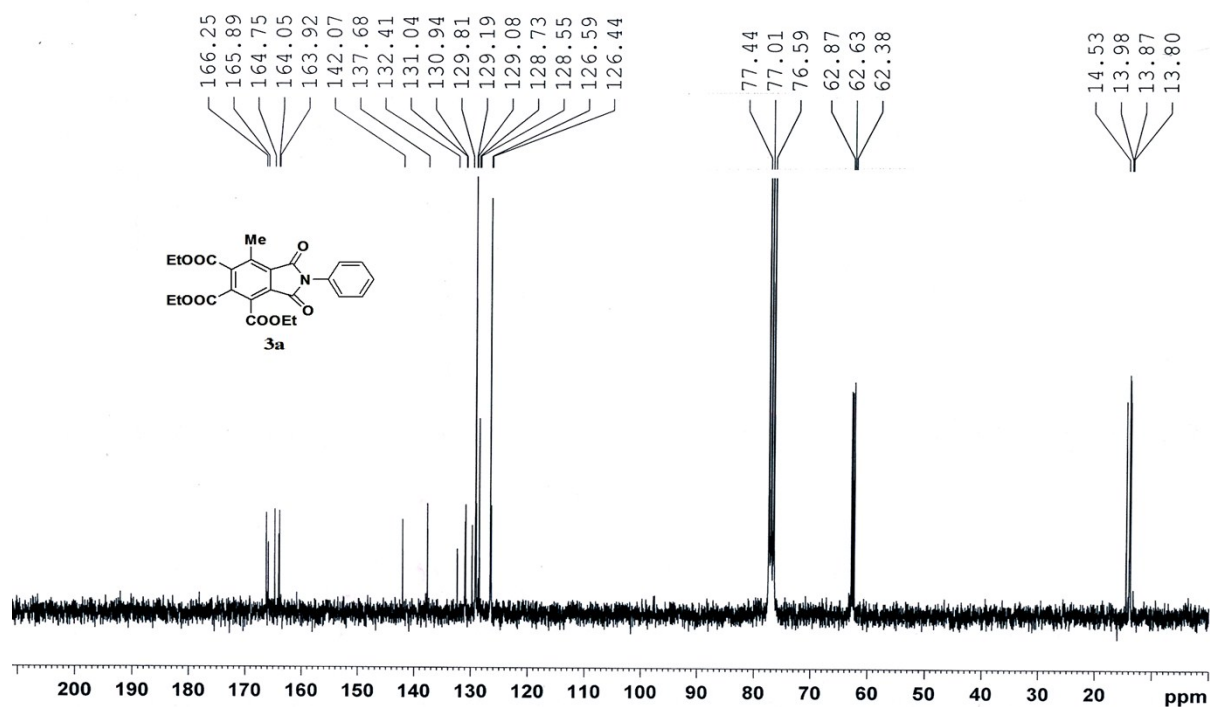

# $^1\text{H}$ & $^{13}\text{C}$ NMR of **3b**

300 MHz NMR Machine; Department of Chemistry; University of Calcutta; SAP-CAS P  
Sample:Subh-141R; PMR, CDCl<sub>3</sub>; Supervisor:Dr. D. K. Maiti; Dt: 27/05/15

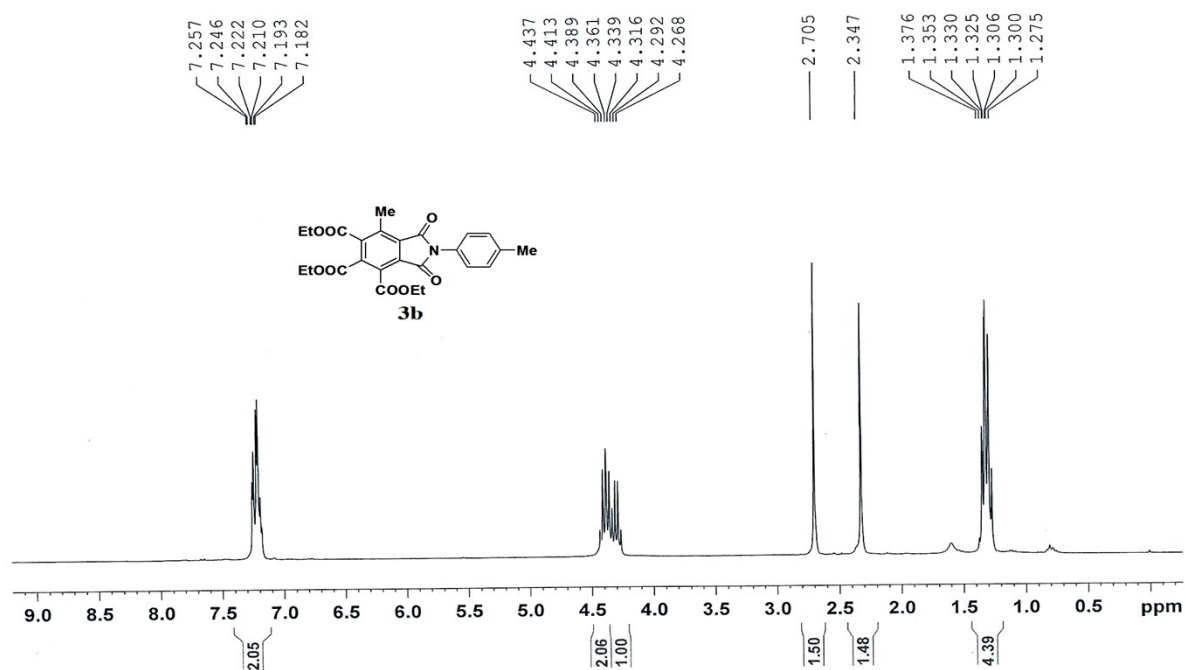

300 MHz NMR Machine; Department of Chemistry; University of Calcutta; SAP-CAS P  
Sample:Subh-141R;  $^{13}\text{C}$ ; CDC13; Supervisor:Dr. D. K. Maiti;Dt:28/05/15

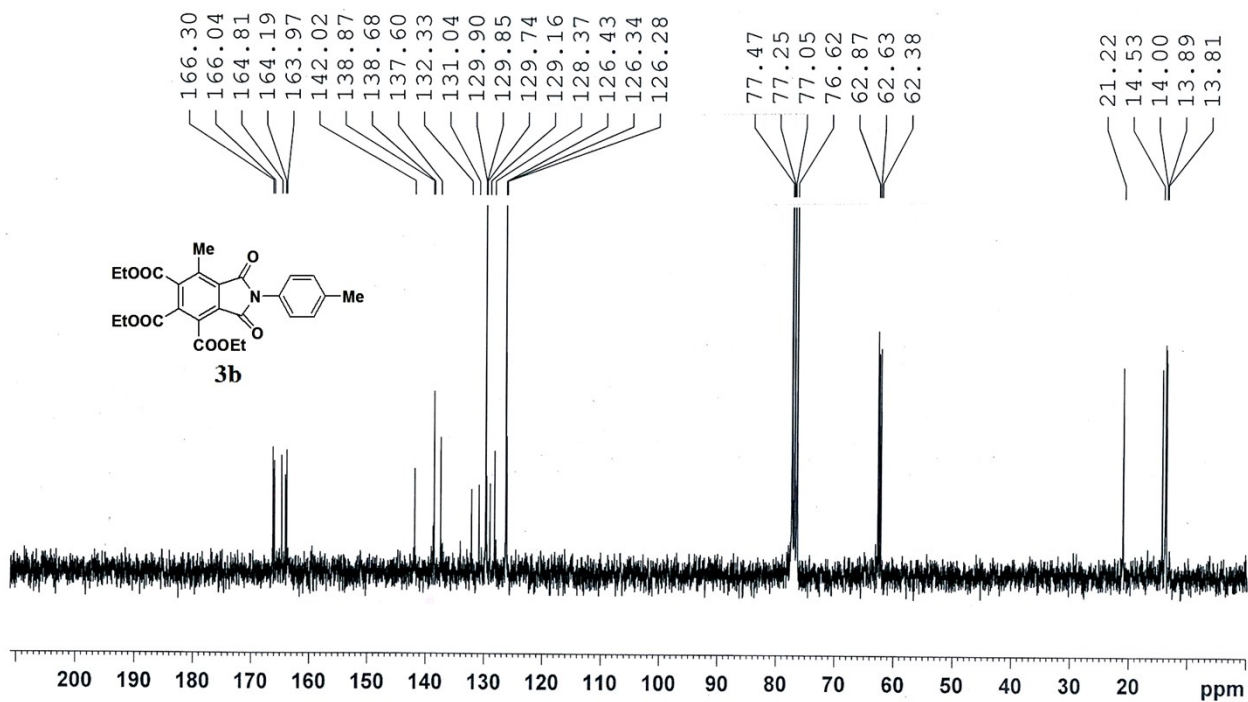

# $^1\text{H}$ & $^{13}\text{C}$ NMR of **3c**

300 MHz NMR Machine, Department of Chemistry; University of Calcutta; SAP-CAS P  
 Sample:Subh-140; CDCl<sub>3</sub>;Supervisor Dr. D. K. Maiti; Dt: 31/03/15

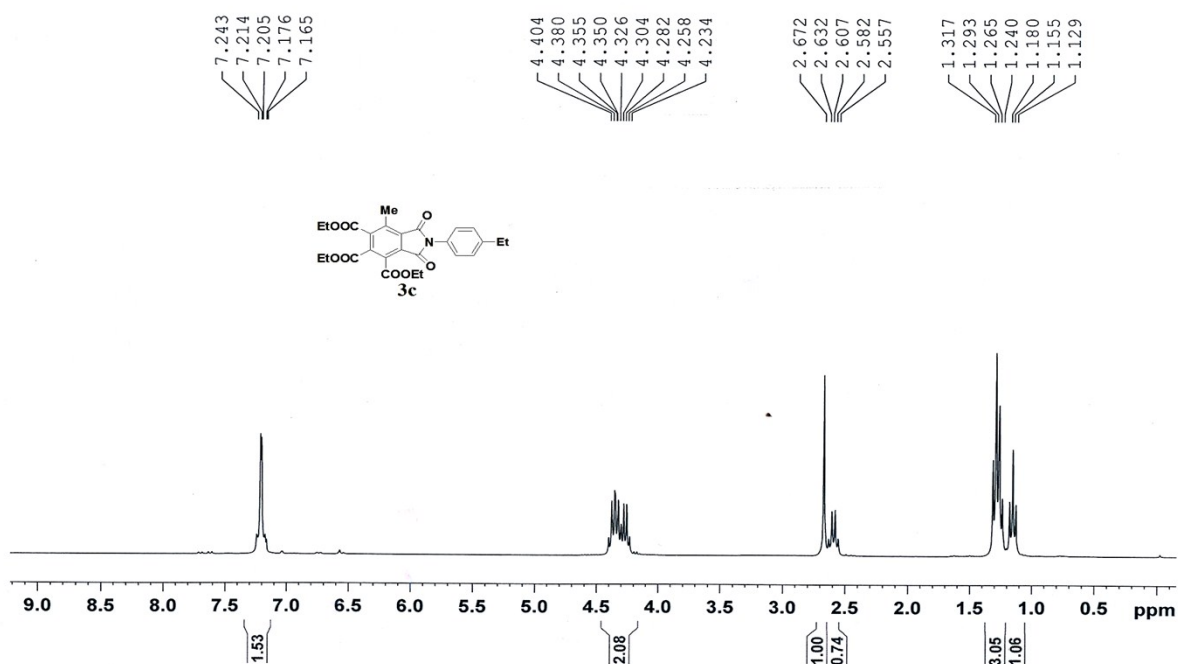

300 MHz NMR Machine; Department of Chemistry; University of Calcutta; SAP-CAS P  
 Sample:Subh-140; $^{13}\text{C}$  CDCl<sub>3</sub>;Supervisor:Dr. D. K. Maiti;Dt:31/03/15

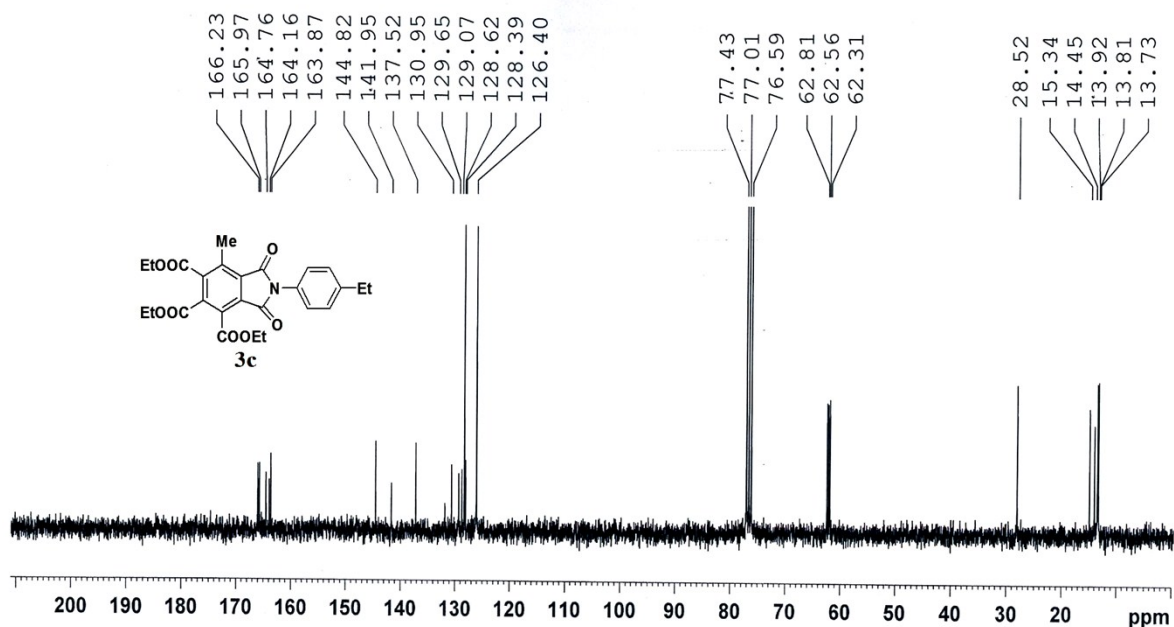

# $^1\text{H}$ & $^{13}\text{C}$ NMR of **3d**

300 MHz NMR Machine; Department of Chemistry; University of Calcutta; SAP-CAS P  
Sample:Subh-136; DMSOd6; Supervisor:Dr. D. K. Maiti; Dt: 07/04/15

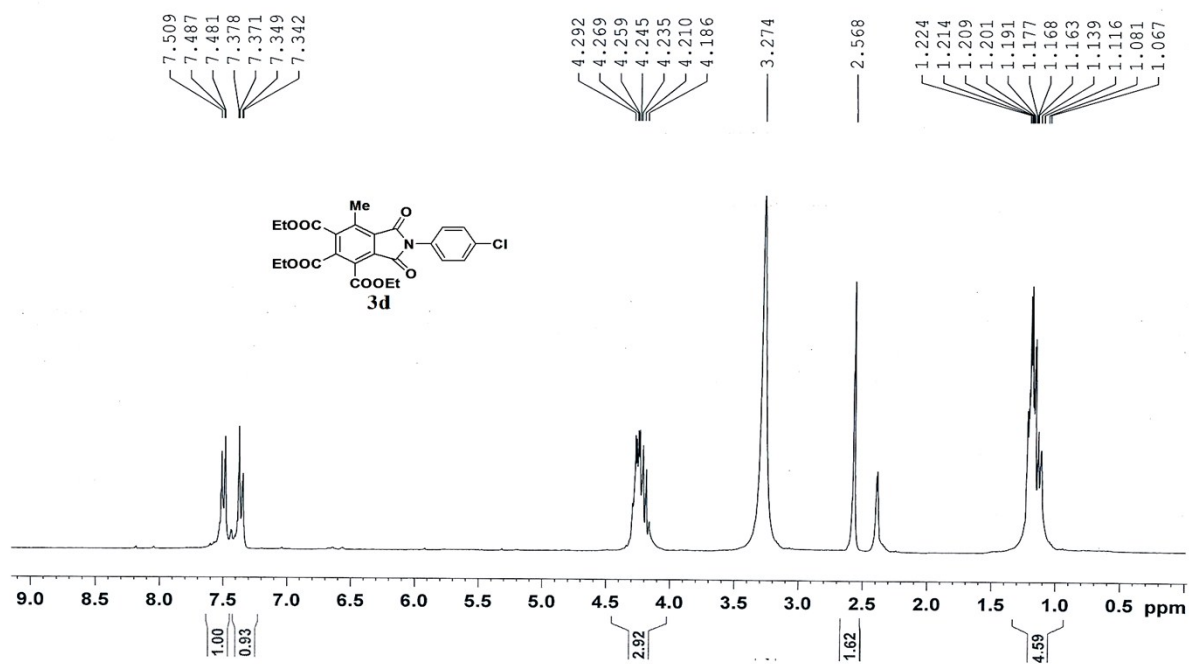

300 MHz NMR Machine; Department of Chemistry; University of Calcutta; SAP-CAS P  
Sample:SUBH-136;  $^{13}\text{C}$  DMSOd6; Supervisor:Dr. D. K. Maiti; Dt:26/02/15

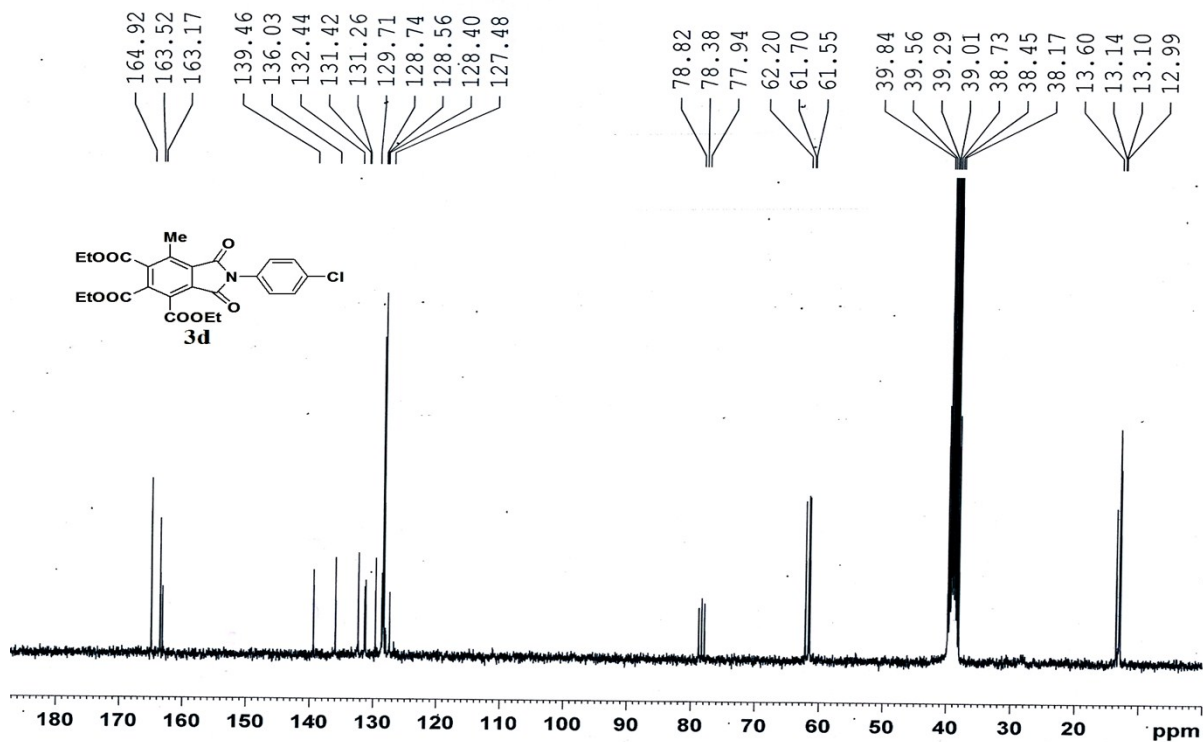

# $^1\text{H}$ & $^{13}\text{C}$ NMR of **3e**

300 MHz NMR Machine; Department of Chemistry; University of Calcutta; SAP-CAS P  
 Sample:Subh-135; CDC13;Supervisor:Dr. D. K. Maiti; Dt: 20/02/15

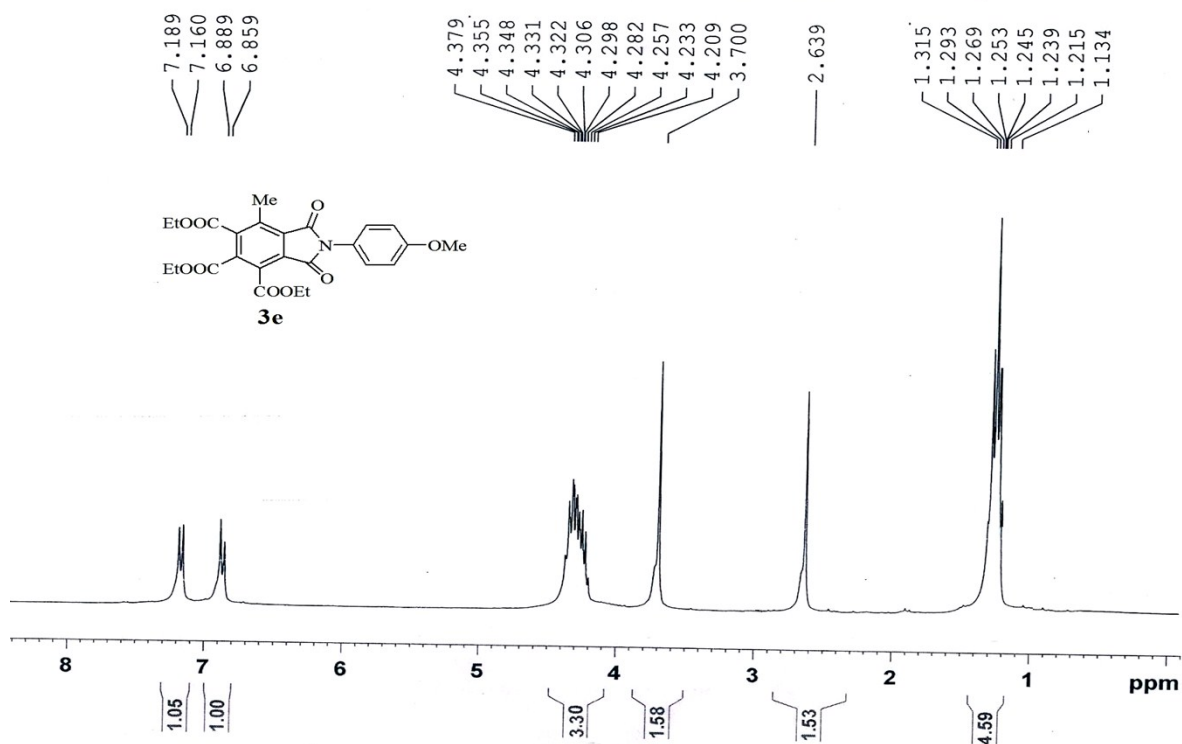

300 MHz NMR Machine; Department of Chemistry; University of Calcutta; SAP-CAS P  
 Sample:Subh-135; $^{13}\text{C}$  CDC13;Supervisor:Dr. D. K. Maiti;Dt:21/02/15

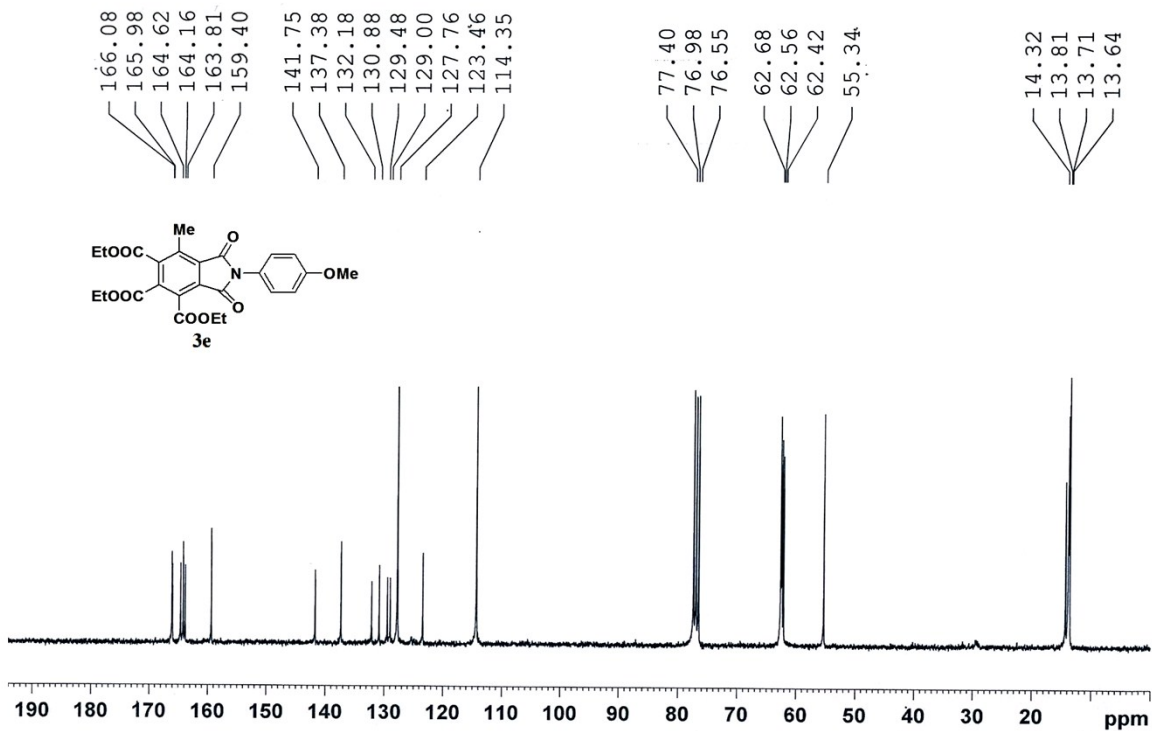

# $^1\text{H}$ & $^{13}\text{C}$ NMR of **3f**

300 MHz NMR Machine; Department of Chemistry; University of Calcutta; SAP-CAS P  
Sample:Subh-142R; CDCl<sub>3</sub>;Supervisor:Dr. D. K. Maiti; Dt: 10/04/15

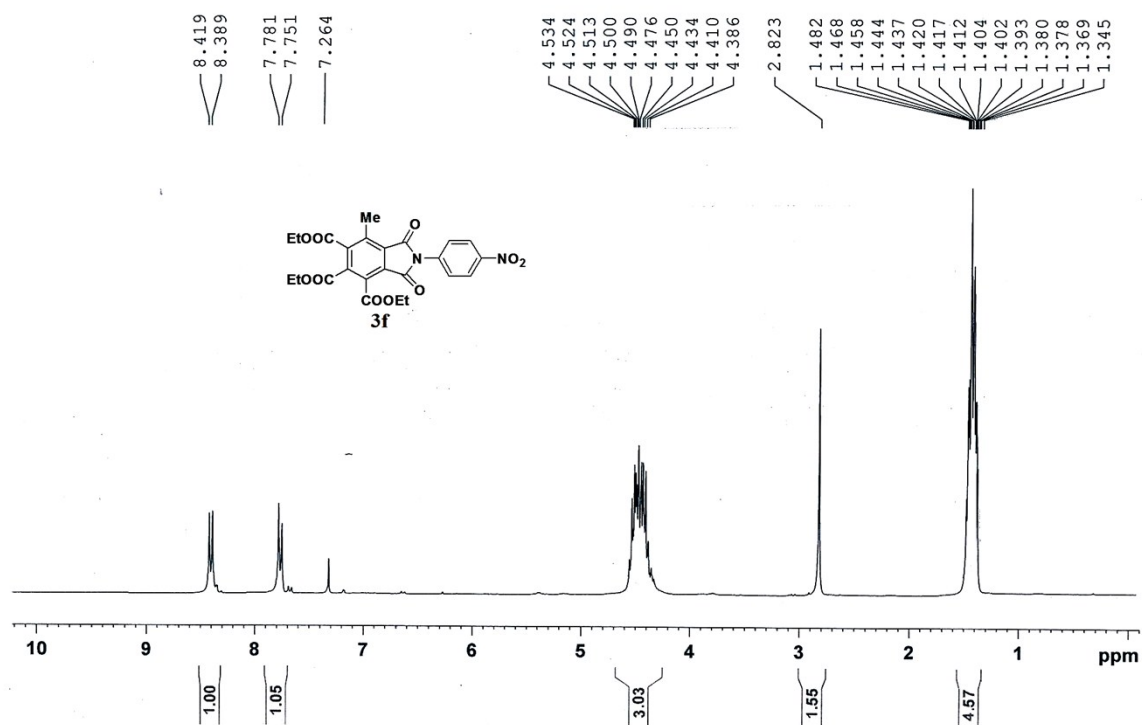

300 MHz NMR Machine; Department of Chemistry; University of Calcutta; SAP-CAS P  
Sample:Subh-142;  $^{13}\text{C}$  CDCl<sub>3</sub>;Supervisor:Dr. D. K. Maiti;Dt:08/04/15

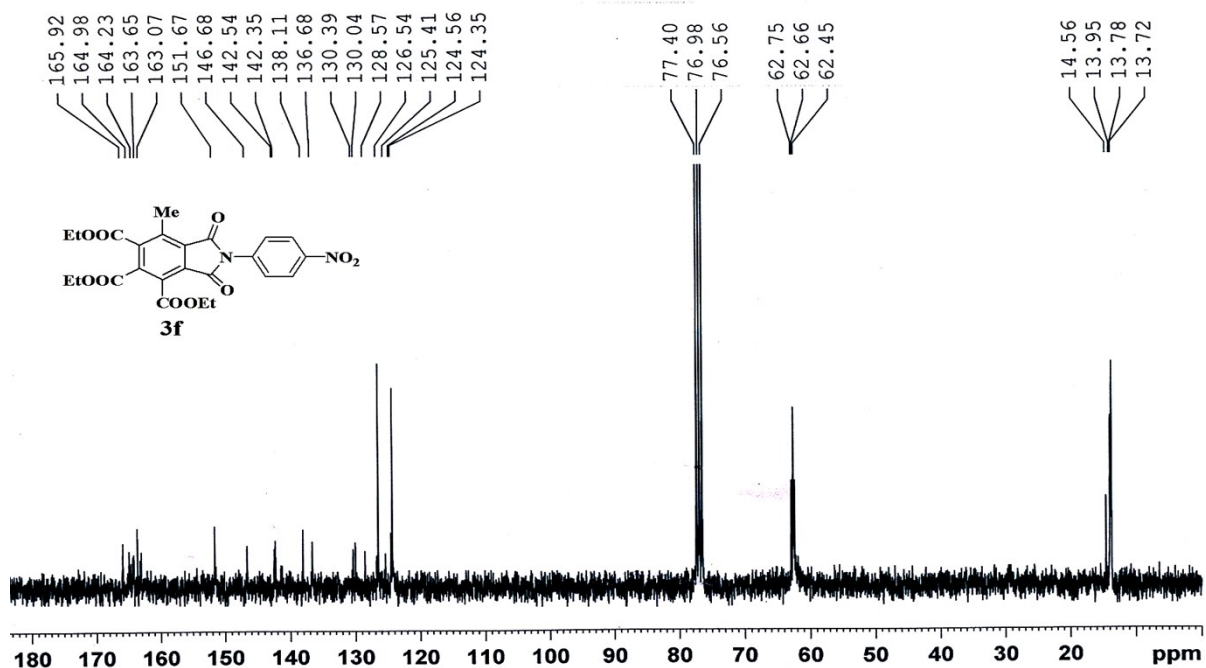



# $^1\text{H}$ & $^{13}\text{C}$ NMR of **3g**

300 MHz NMR Machine; Department of Chemistry; University of Calcutta; SAP-CAS P  
 Sample:Subh-138(1);  $\text{CDCl}_3$ ; Supervisor:Dr. D. K. Maiti; Dt: 27/04/15

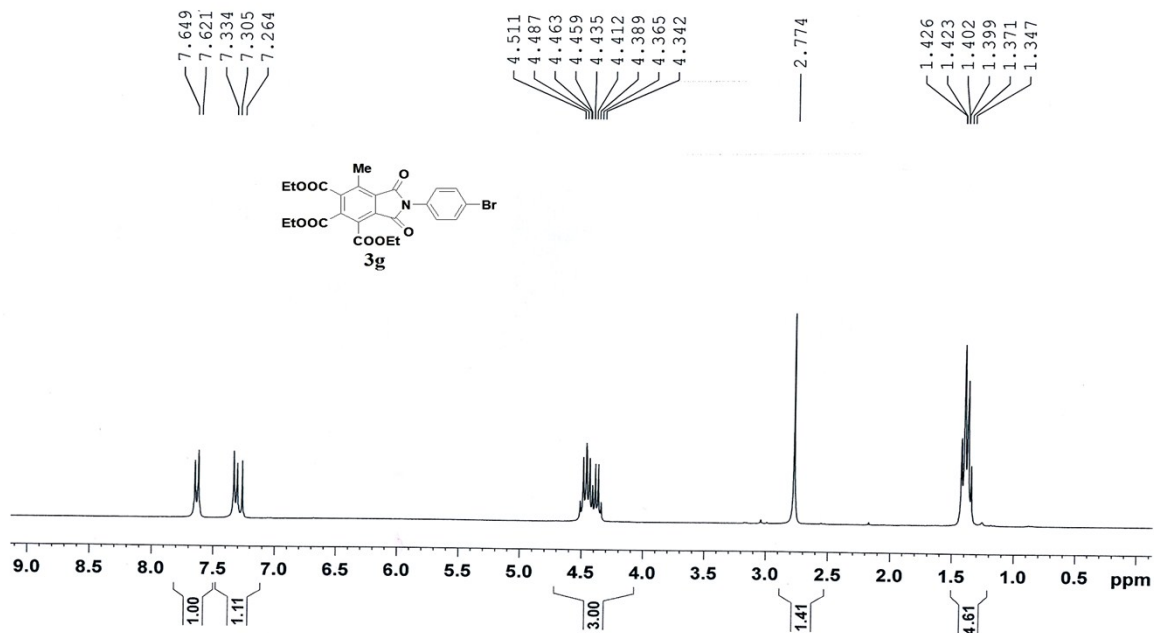

300 MHz NMR Machine; Department of Chemistry; University of Calcutta; SAP-CAS P  
 Sample:Subh-138(1);  $^{13}\text{C}$   $\text{CDCl}_3$ ; Supervisor:Dr. D. K. Maiti; Dt:27/04/15

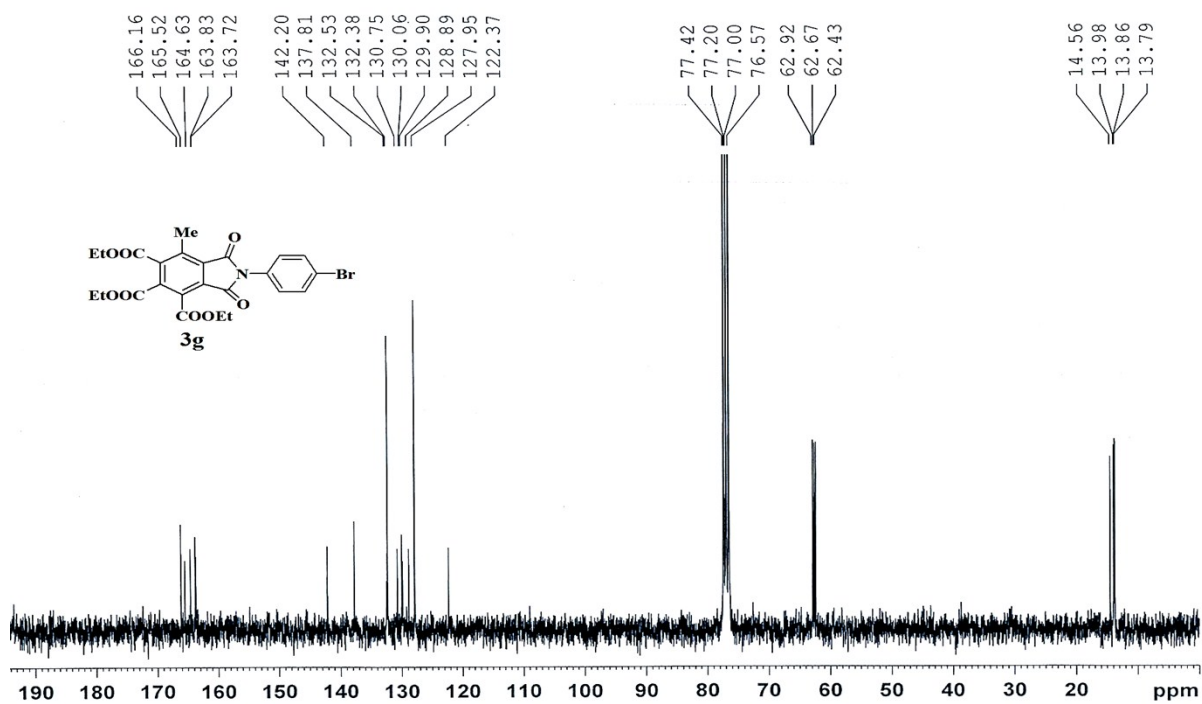

# <sup>1</sup>H & <sup>13</sup>C NMR of 3h

300 MHz NMR Machine; Department of Chemistry; University of Calcutta; SAP-CAS P  
 Sample:Subh-147; CDCl<sub>3</sub>; Supervisor:Dr. D. K. Maiti; Dt: 05/05/15

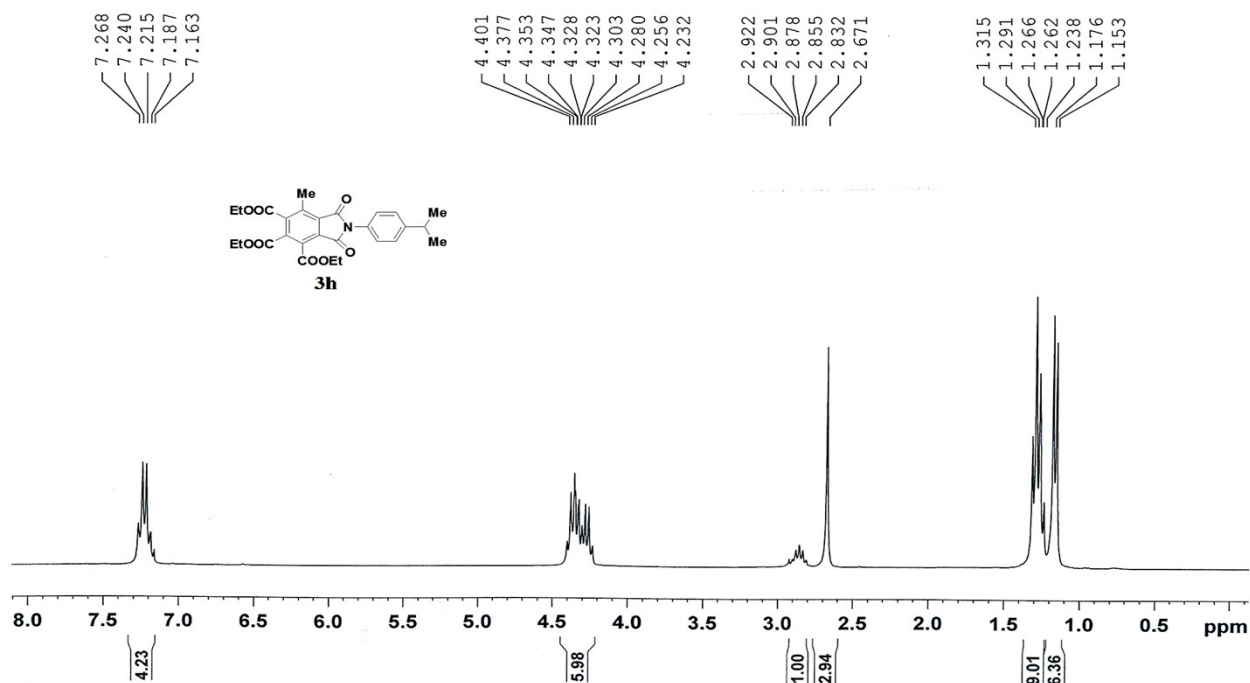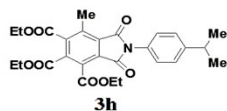

300 MHz NMR Machine; Department of Chemistry; University of Calcutta; SAP-CAS P  
 Sample:Subh-147; <sup>13</sup>C CDCl<sub>3</sub>; Supervisor:Dr. D. K. Maiti; Dt:05/05/15

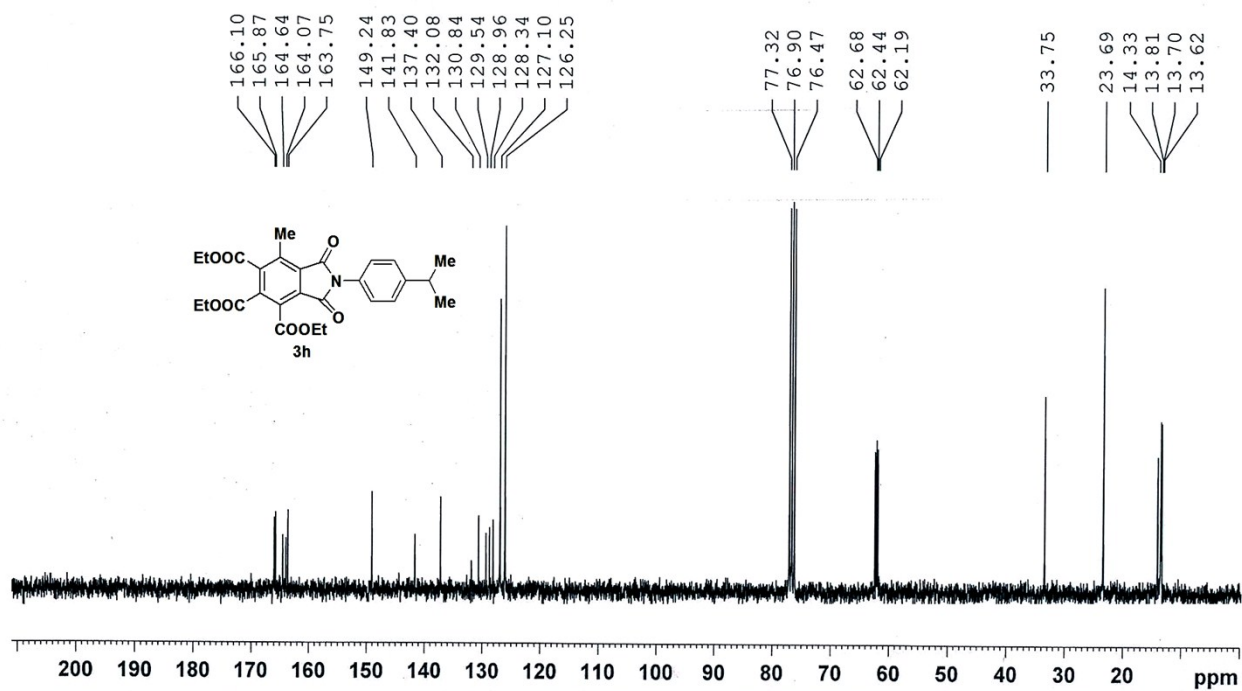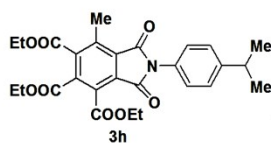

# $^1\text{H}$ & $^{13}\text{C}$ NMR of **3i**

300 MHz NMR Machine; Department of Chemistry; University of Calcutta; SAP-CAS P  
Sample:Subh-144; CDC13;Supervisor:Dr. D. K. Maiti; Dt: 10/04/15

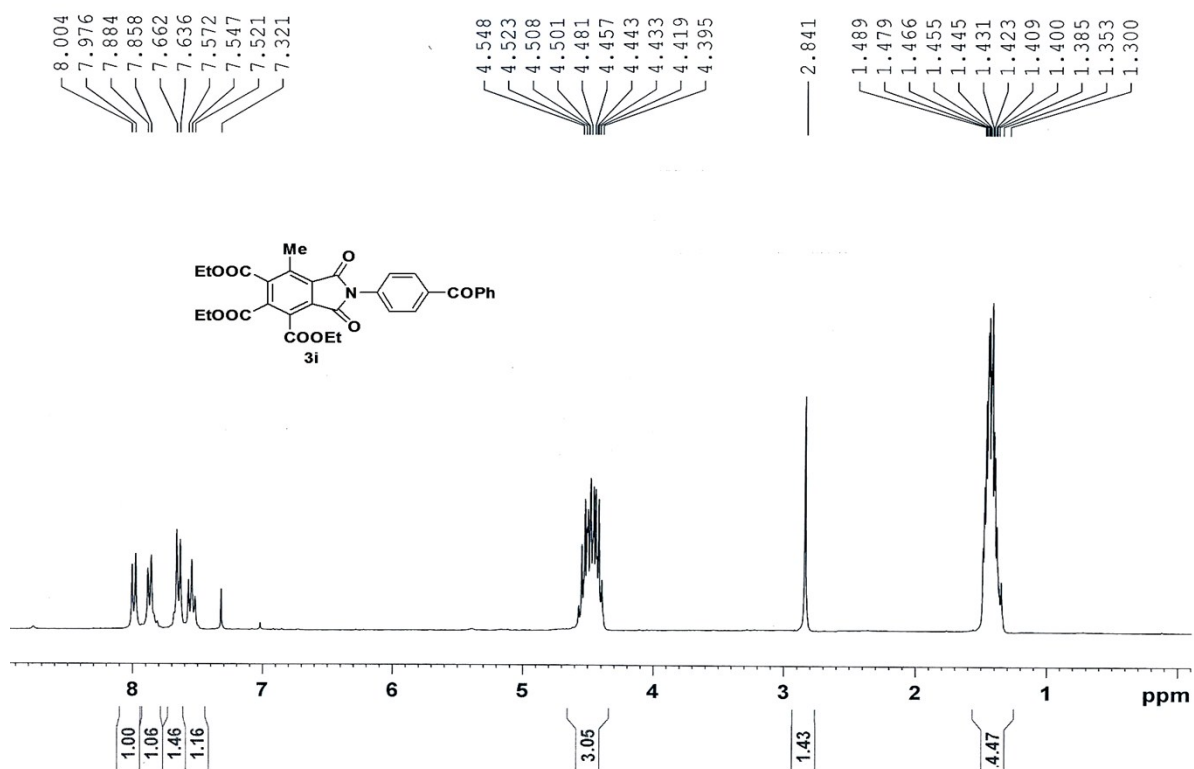

300 MHz NMR Machine; Department of Chemistry; University of Calcutta; SAP-CAS P  
Sample:Subh-144; $^{13}\text{C}$  CDC13;Supervisor:Dr. D. K. Maiti;Dt:10/04/15

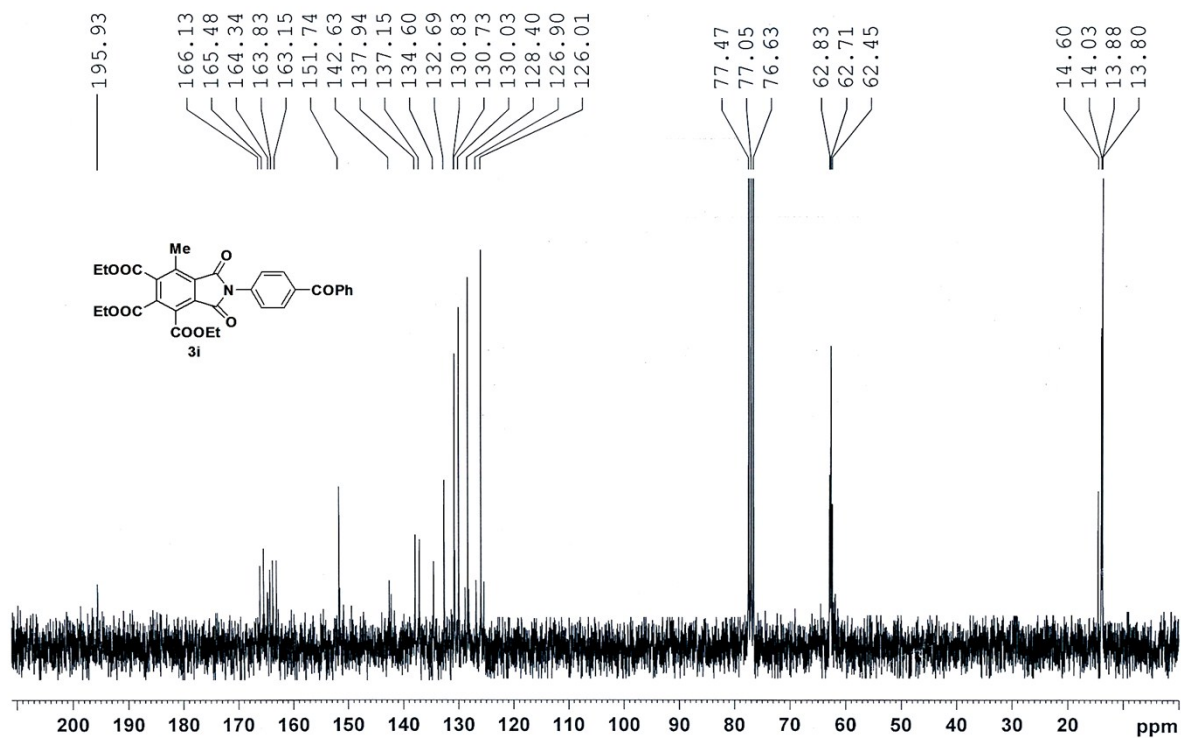

# $^1\text{H}$ & $^{13}\text{C}$ NMR of **3j**

300 MHz NMR Machine; Department of Chemistry; University of Calcutta; SAP-CAS P  
Sample:Subh-156(2); PMR, CDCl<sub>3</sub>; Supervisor:Dr. D. K. Maiti; Dt: 11/06/15

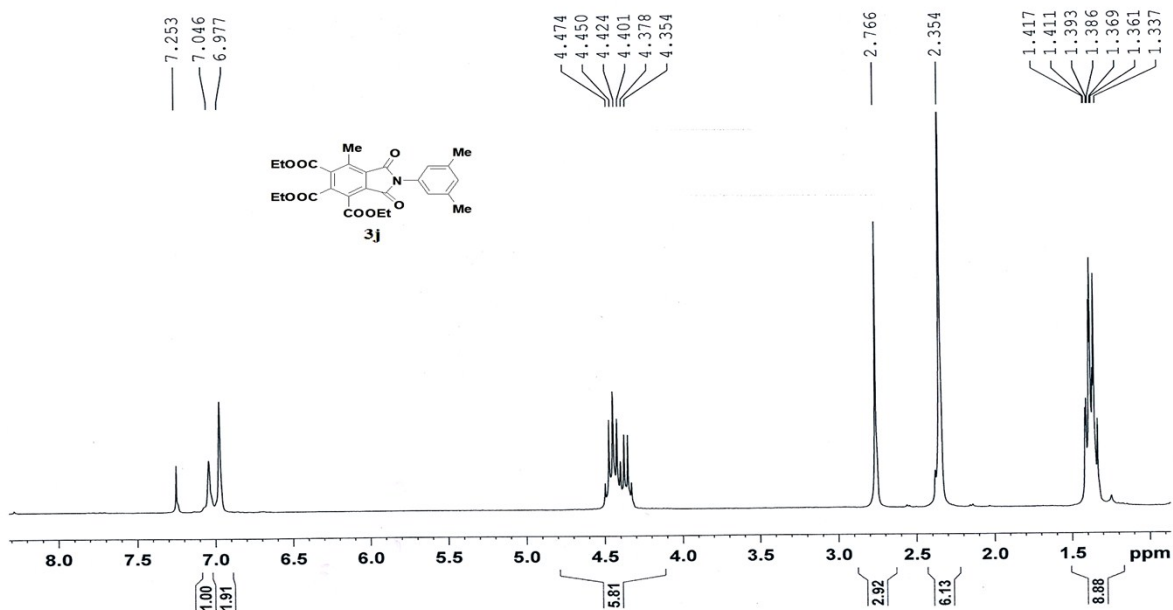

300 MHz NMR Machine; Department of Chemistry; University of Calcutta; SAP-CAS Program  
Sample:Subh-156(2);  $^{13}\text{C}$ ; CDCl<sub>3</sub>; Supervisor:Dr. D. K. Maiti; Dt:11/06/15

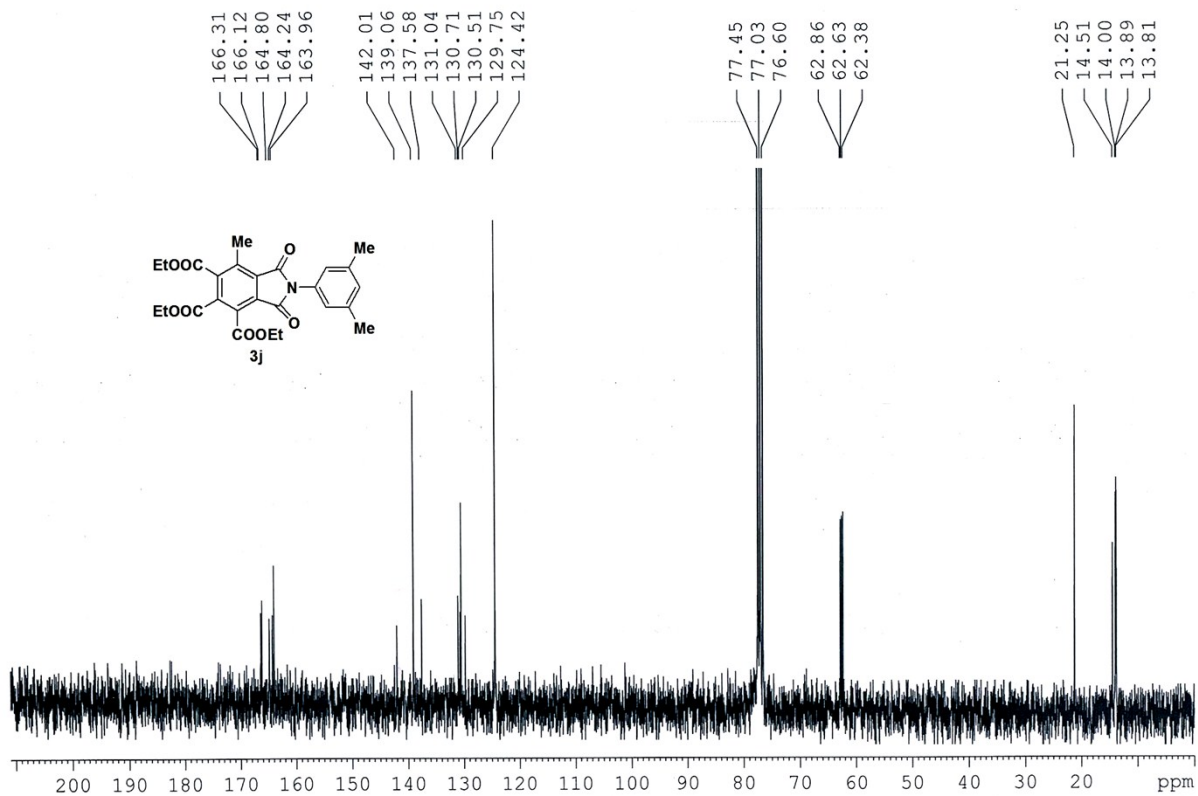

# $^1\text{H}$ & $^{13}\text{C}$ NMR of **3k**

300 MHz NMR Machine; Department of Chemistry; University of Calcutta; SAP-CAS P  
Sample:Subh-145(2); CDCl<sub>3</sub>; Supervisor:Dr. D. K. Maiti; Dt: 14/04/15

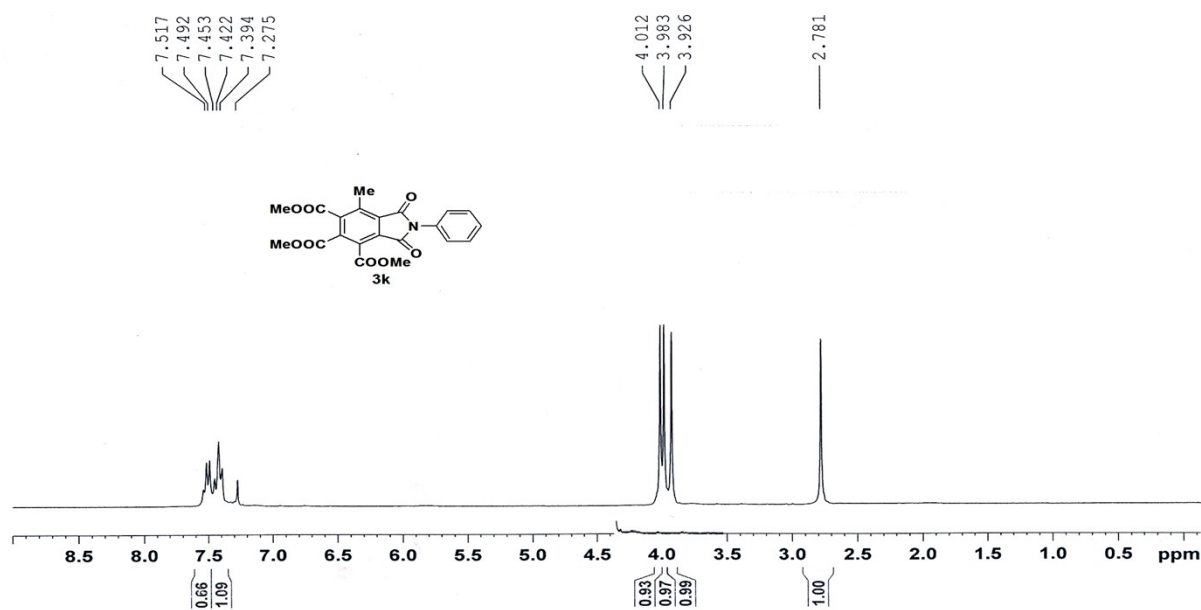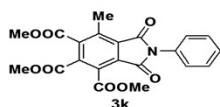

300 MHz NMR Machine; Department of Chemistry; University of Calcutta; SAP-CAS P  
Sample:Subh-145(2-R);  $^{13}\text{C}$   $\text{CDCl}_3$ ; Supervisor:Dr. D. K. Maiti; Dt:25/04/15

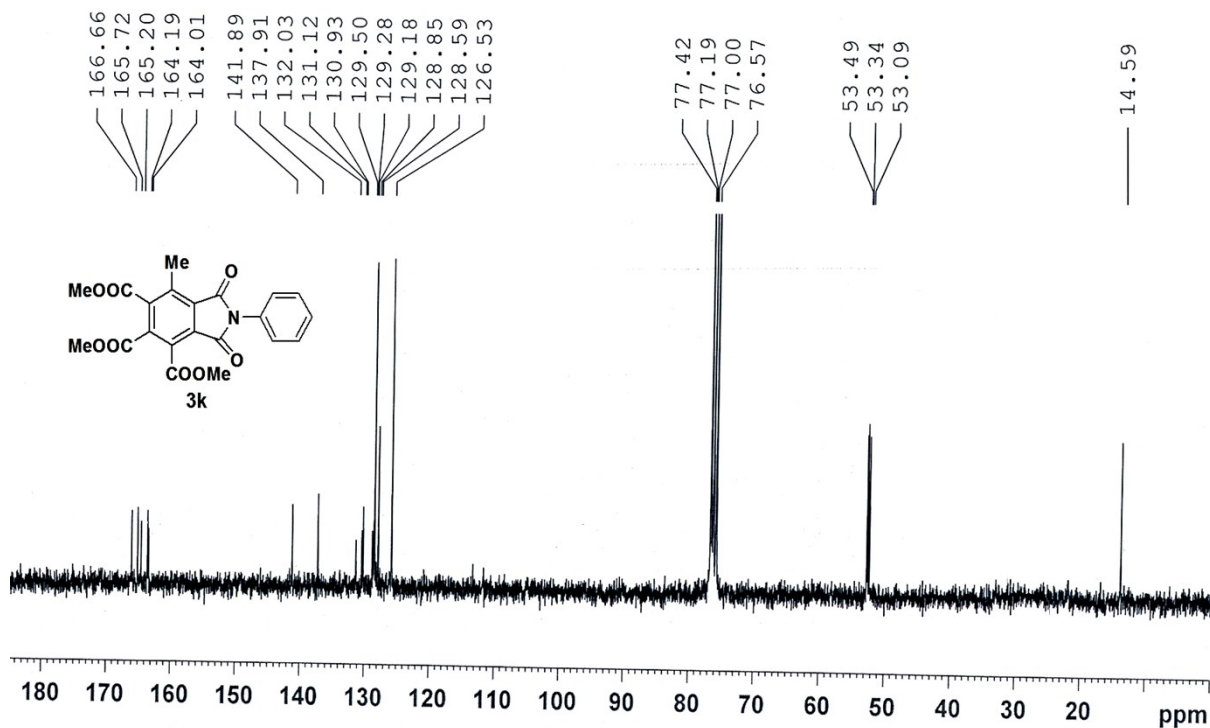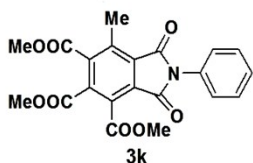

# $^1\text{H}$ & $^{13}\text{C}$ NMR of **31**

300 MHz NMR Machine; Department of Chemistry; University of Calcutta; SAP-CAS P  
Sample:Subh-150(2); PMR, CDCl<sub>3</sub>; Supervisor:Dr. D. K. Maiti; Dt: 14/05/15

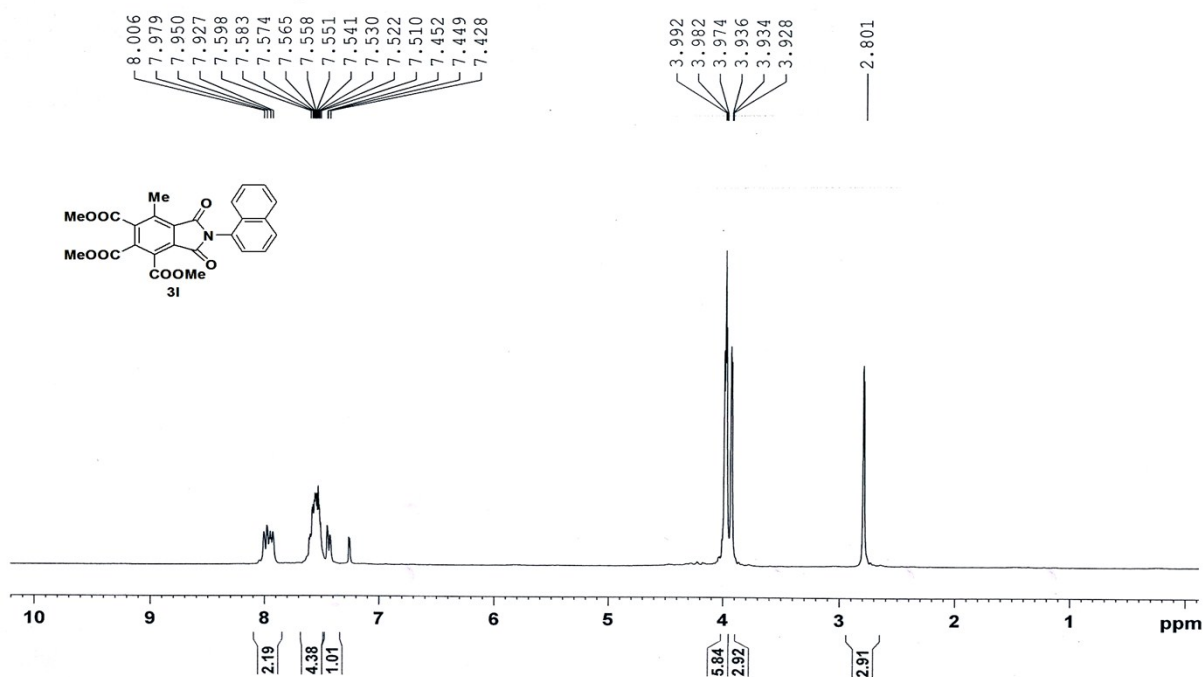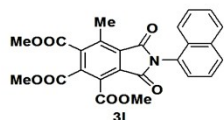

300 MHz NMR Machine; Department of Chemistry; University of Calcutta; SAP-CAS P  
Sample:Subh-150(2);  $^{13}\text{C}$  CDCl<sub>3</sub>; Supervisor:Dr. D. K. Maiti; Dt:14/05/15

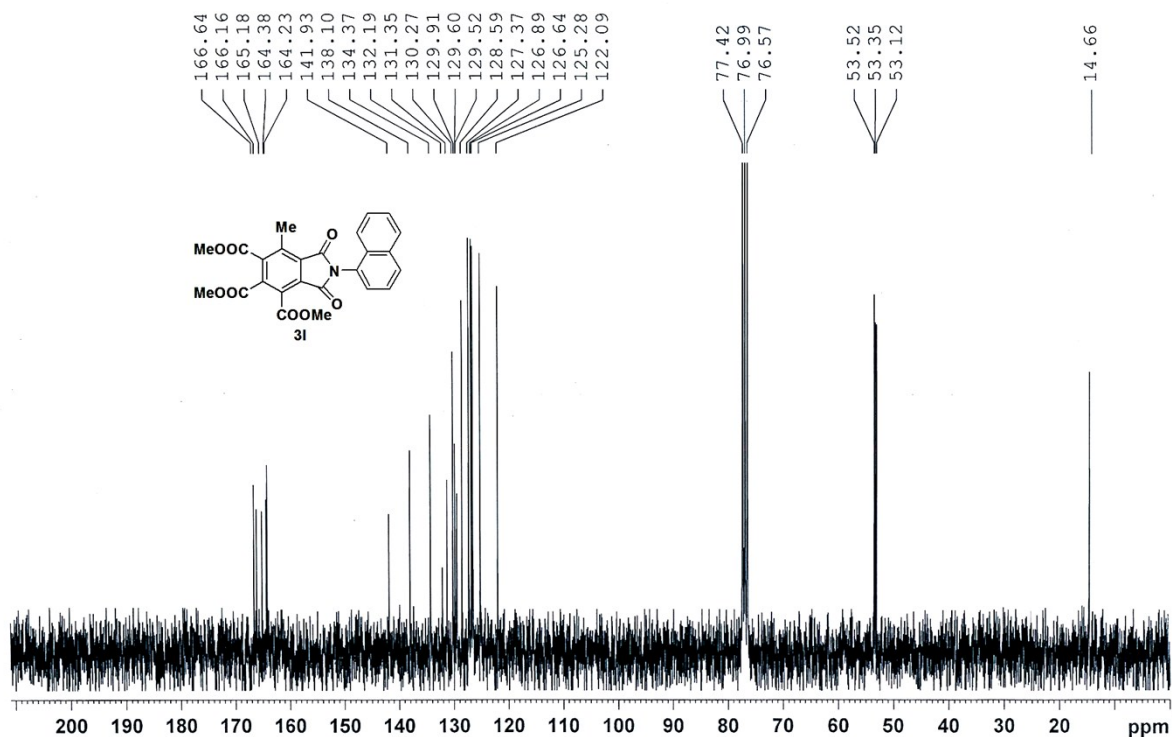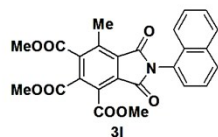

# $^1\text{H}$ & $^{13}\text{C}$ NMR of **3m**

300 MHz NMR Machine; Department of Chemistry; University of Calcutta; SAP-CAS P  
 Sample:Subh-146; CDCl<sub>3</sub>; Supervisor:Dr. D. K. Maiti; Dt: 27/04/15

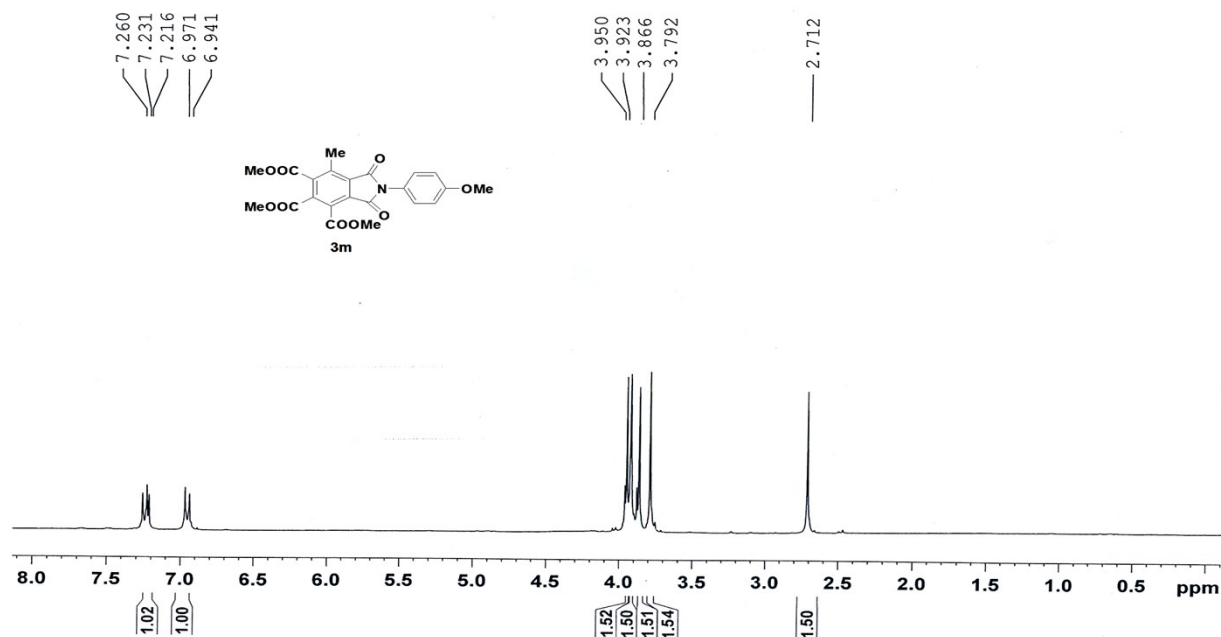

300 MHz NMR Machine; Department of Chemistry; University of Calcutta; SAP-CAS P  
 Sample:Subh-146;  $^{13}\text{C}$  CDCl<sub>3</sub>; Supervisor:Dr. D. K. Maiti; Dt:27/04/15

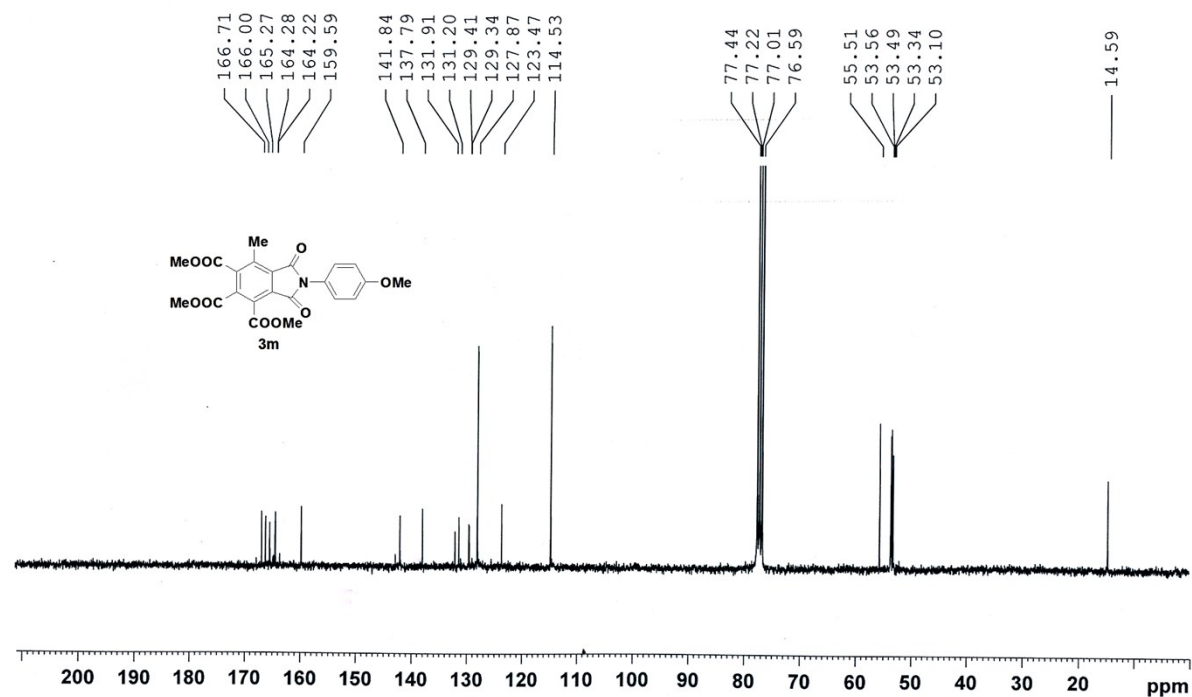

# $^1\text{H}$ & $^{13}\text{C}$ NMR of **3n**

300 MHz NMR Machine; Department of Chemistry; University of Calcutta; SAP-CAS P  
Sample:Subh-148; CDCl<sub>3</sub>; Supervisor:Dr. D. K. Maiti; Dt: 07/05/15

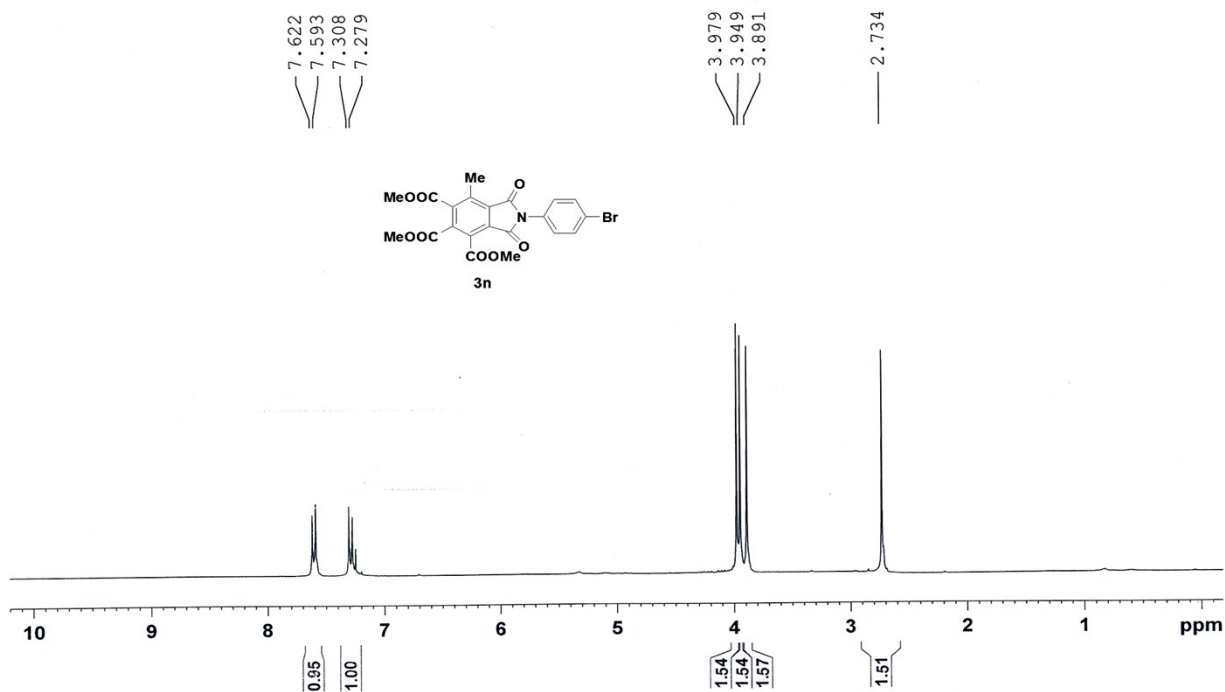

300 MHz NMR Machine; Department of Chemistry; University of Calcutta; SAP-CAS P  
Sample:TSubh-148;  $^{13}\text{C}$  CDCl<sub>3</sub>; Supervisor:Dr. D. K. Maiti; Dt:07/05/15

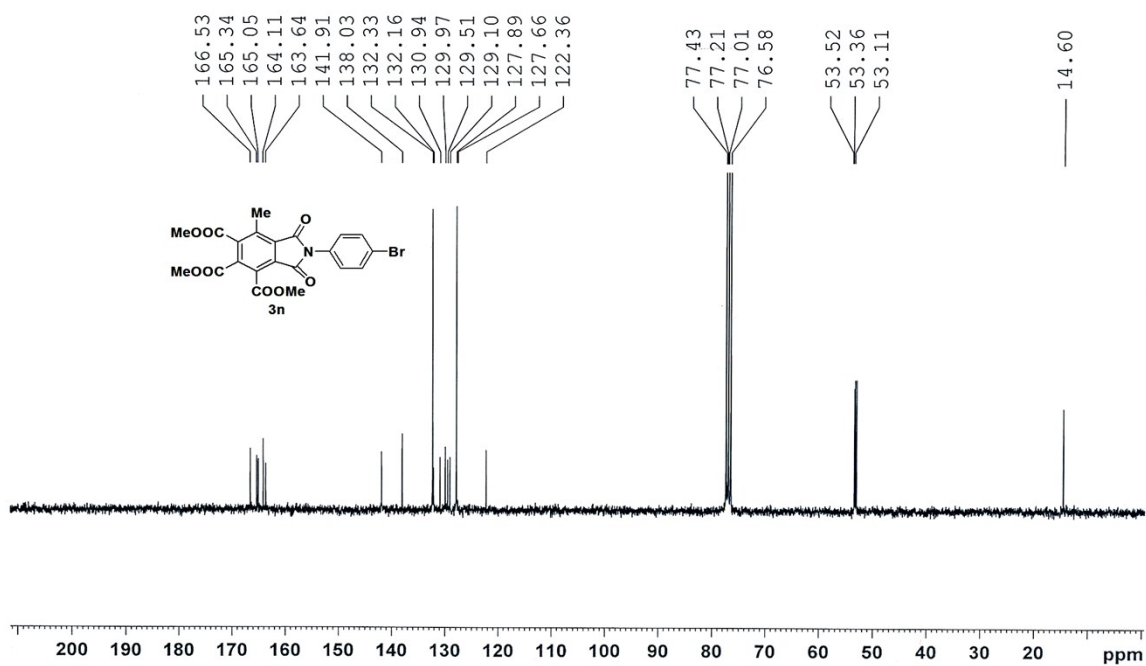



# $^1\text{H}$ & $^{13}\text{C}$ NMR of **3o**

300 MHz NMR Machine; Department of Chemistry; University of Calcutta; SAP-CAS P  
 Sample:Subh-149; CDC13; Supervisor:Dr. D. K. Maiti; Dt: 08/05/15

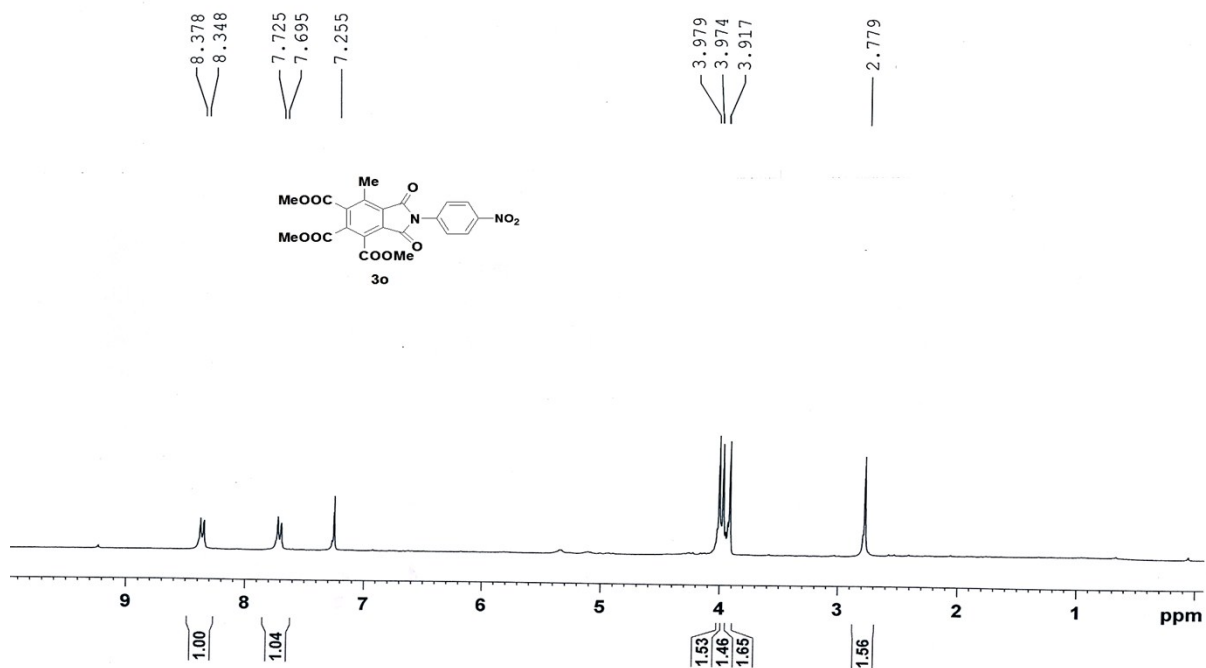

300 MHz NMR Machine; Department of Chemistry; University of Calcutta; SAP-CAS P  
 Sample:Subh-149;  $^{13}\text{C}$  CDCl<sub>3</sub>; Supervisor:Dr. D. K. Maiti; Dt:09/05/15

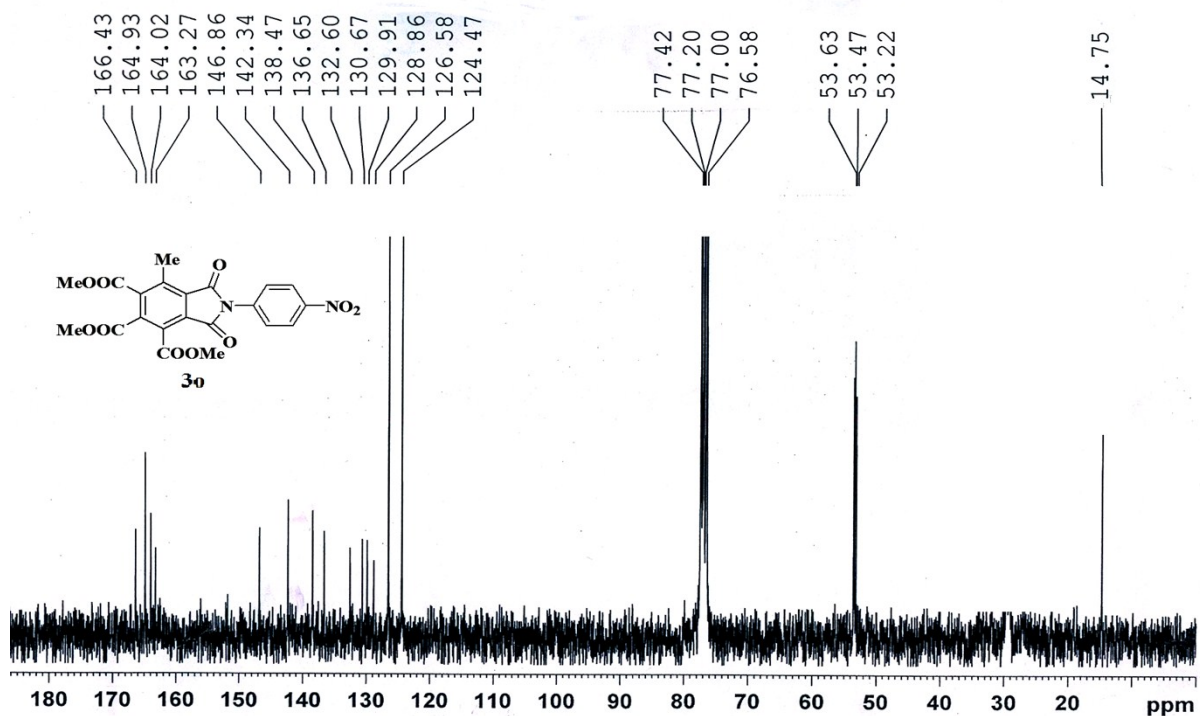

# <sup>1</sup>H & <sup>13</sup>C NMR of 3p

300 MHz NMR Machine; Department of Chemistry; University of Calcutta; SAP-CAS P  
 Sample:Subh-152;13C; DMSO-d6; Supervisor:Dr. D. K. Maiti; Dt: 25/05/15

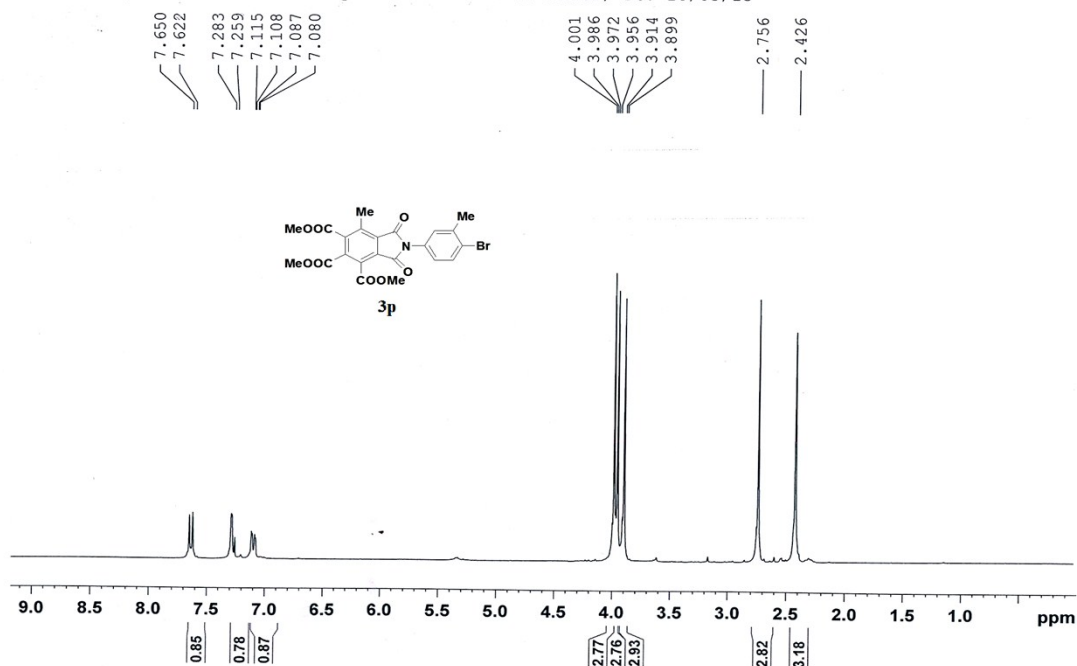

300 MHz NMR Machine; Department of Chemistry; University of Calcutta; SAP-CAS P  
 Sample:Subh-152;13C; DMSO-d6; Supervisor:Dr. D. K. Maiti; Dt:15/05/15

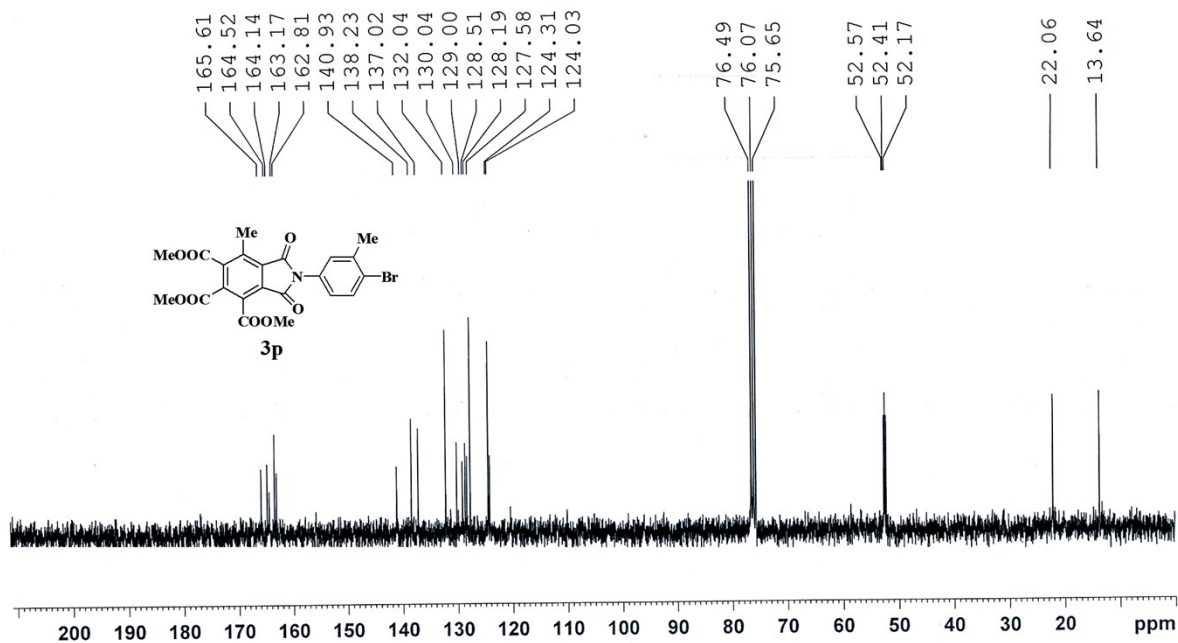

# $^1\text{H}$ & $^{13}\text{C}$ NMR of **3q**

300 MHz NMR Machine; Department of Chemistry; University of Calcutta; SAP-CAS Program  
Sample: Subh-161 (3),  $^1\text{H}$ ;  $\text{CDCl}_3$ ; Supervisor: Prof. D.K. Maiti; Dt: 09/11/15

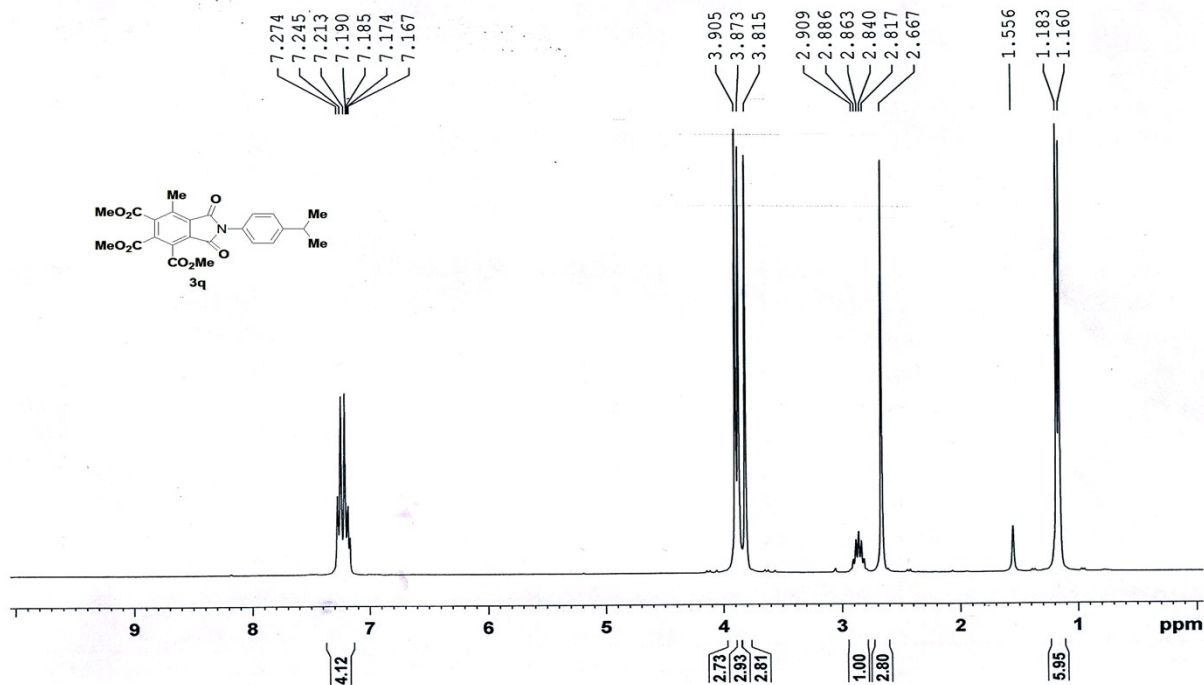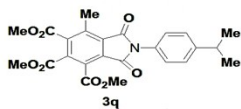

300 MHz NMR Machine; Department of Chemistry; University of Calcutta; SAP-CAS Program  
Sample: Subh-161 (3);  $^{13}\text{C}$ ;  $\text{CDCl}_3$ ; Supervisor: Prof. D.K. Maiti; Dt: 10/11/15

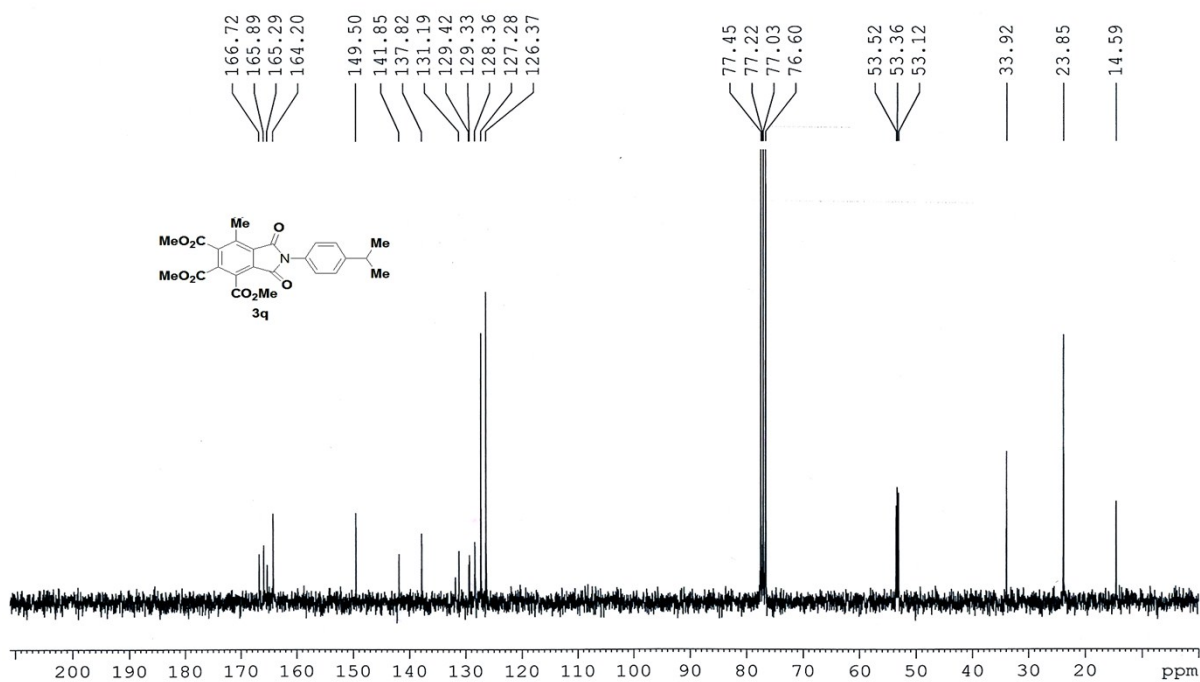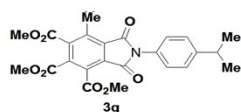

# $^1\text{H}$ & $^{13}\text{C}$ NMR of **3r**

300 MHz NMR Machine; Department of Chemistry; University of Calcutta; SAP-CAS P  
 Sample:Subh-165; PMR,  $\text{CDCl}_3$ ; Supervisor:Dr. D. K. Maiti; Dt: 14/07/15

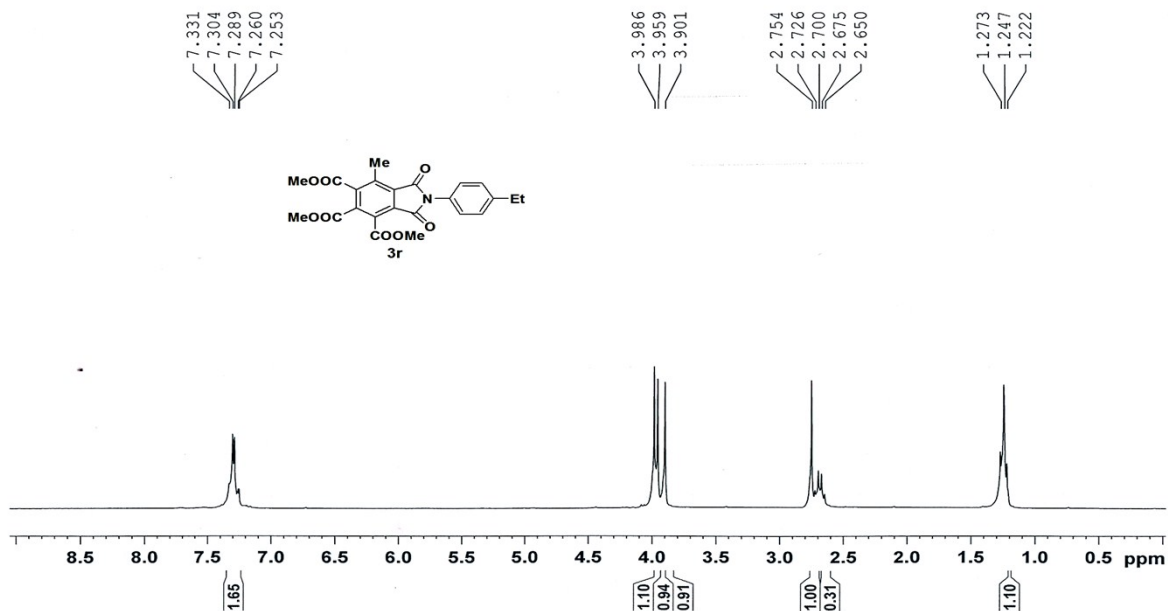

300 MHz NMR Machine; Department of Chemistry; University of Calcutta; SAP-CAS Program  
 Sample:Subh-165;  $^{13}\text{C}$ ;  $\text{CDCl}_3$ ; Supervisor:Dr. D. K. Maiti; Dt:15/07/15

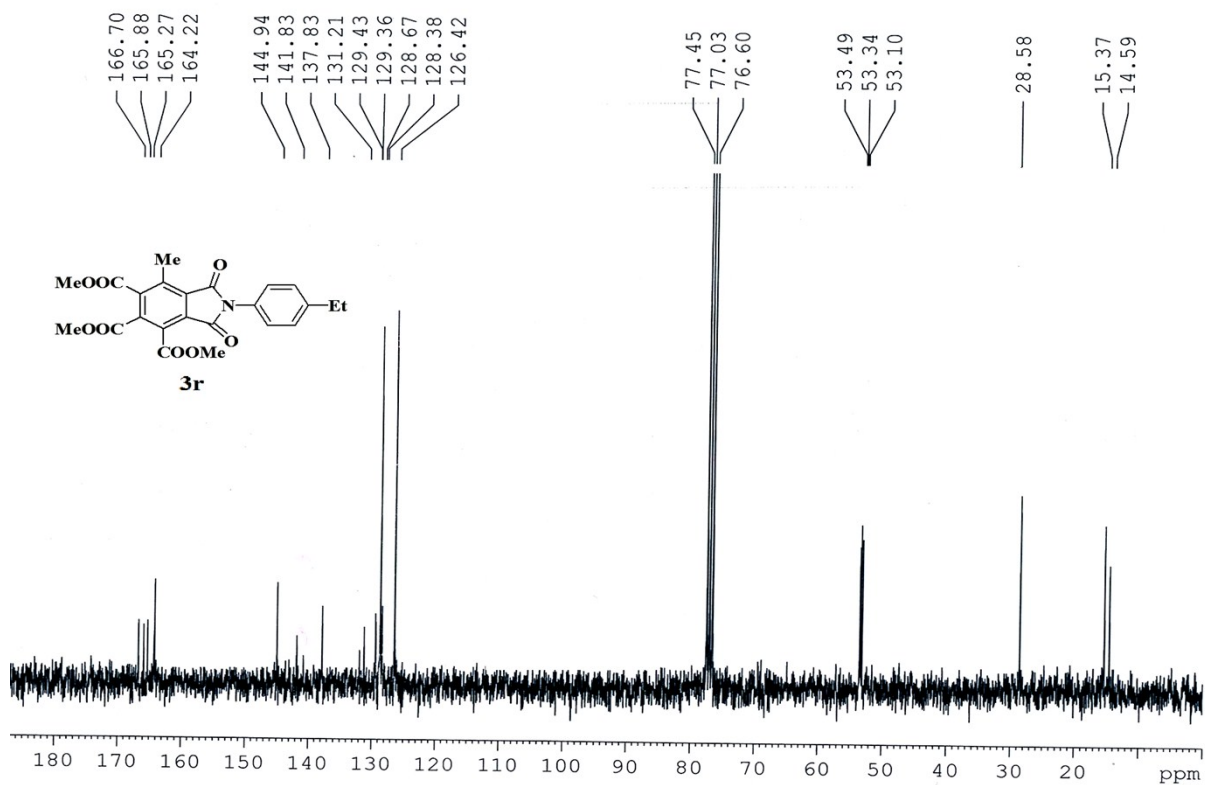

# $^1\text{H}$ & $^{13}\text{C}$ NMR of 7a

300 MHz NMR Machine; Department of Chemistry; University of Calcutta; SAP-CAS Program  
 Sample:Subh-172; PMR;  $\text{CDCl}_3$ ; Supervisor: Prof. D. K. Maiti, Dt:10/08/15

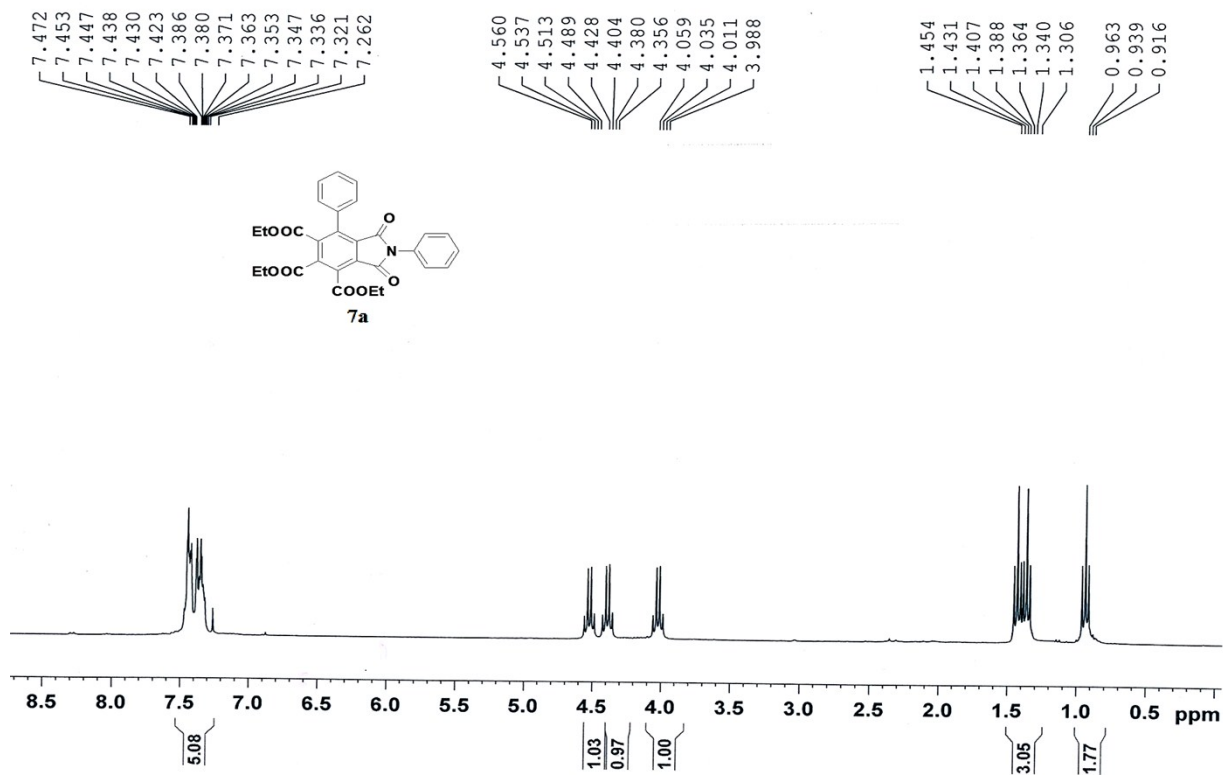

300 MHz NMR Machine; Department of Chemistry; University of Calcutta; SAP-CAS Program  
 Sample:Subh-172;  $^{13}\text{C}$ ;  $\text{CDCl}_3$ ; Supervisor: Dr. D. K. Maiti; Dt:11/08/15

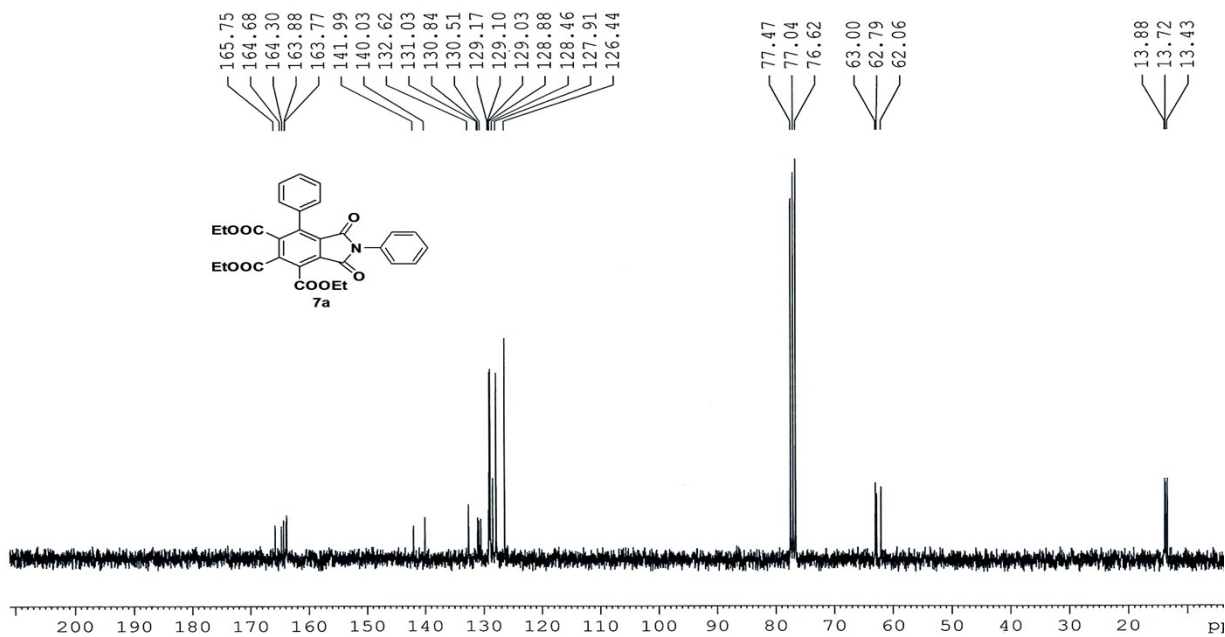

# $^1\text{H}$ & $^{13}\text{C}$ NMR of **7b**

300 MHz NMR Machine; Department of Chemistry; University of Calcutta; SAP-CAS P  
Sample:Subh-169; PMR,  $\text{CDCl}_3$ ; Supervisor:Dr. D. K. Maiti; Dt: 30/07/15

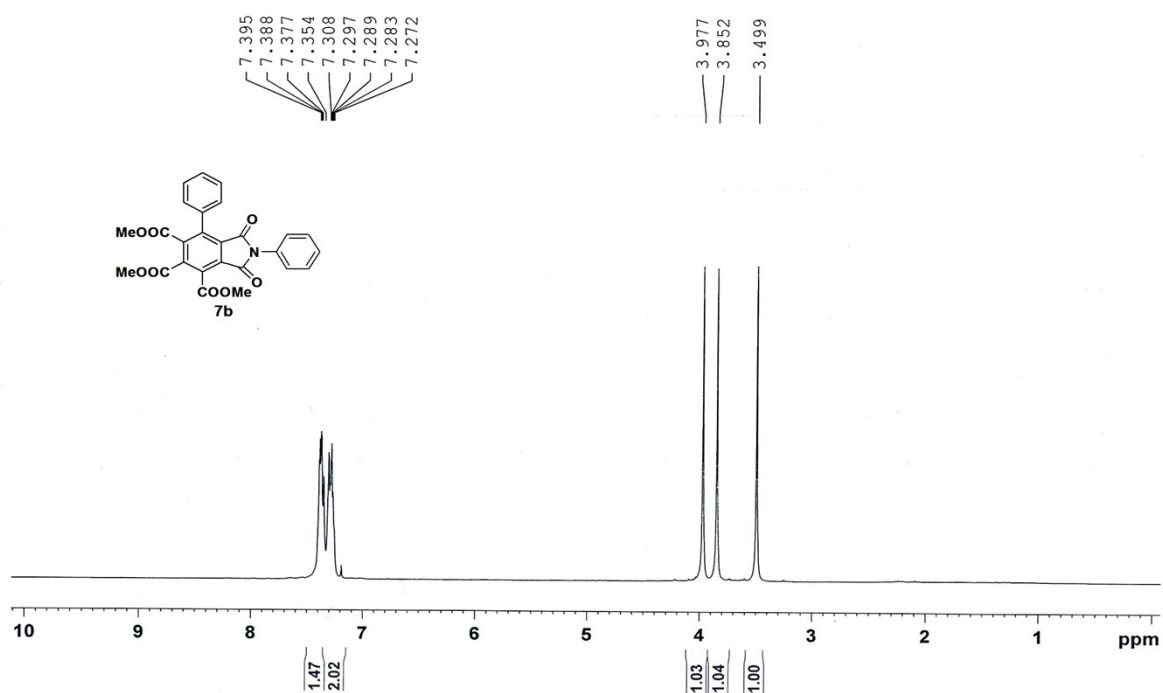

300 MHz NMR Machine; Department of Chemistry; University of Calcutta; SAP-CAS Program  
Sample:Subh-169;  $^{13}\text{C}$ ;  $\text{CDCl}_3$ ; Supervisor:Dr. D. K. Maiti; Dt:31/07/15

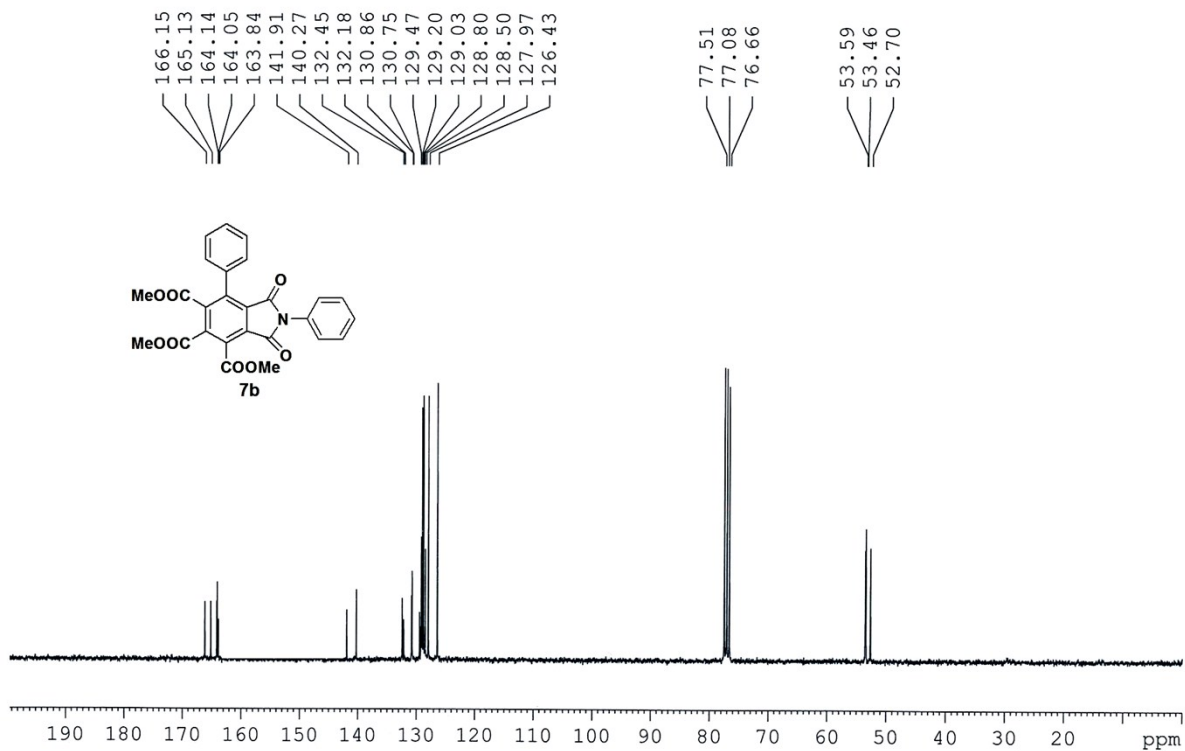

# $^1\text{H}$ & $^{13}\text{C}$ NMR of 7c

300 MHz NMR Machine; Department of Chemistry; University of Calcutta; SAP-CAS P  
Sample:Subh-170; PMR,  $\text{CDCl}_3$ ; Supervisor:Dr. D. K. Maiti; Dt: 01/08/15

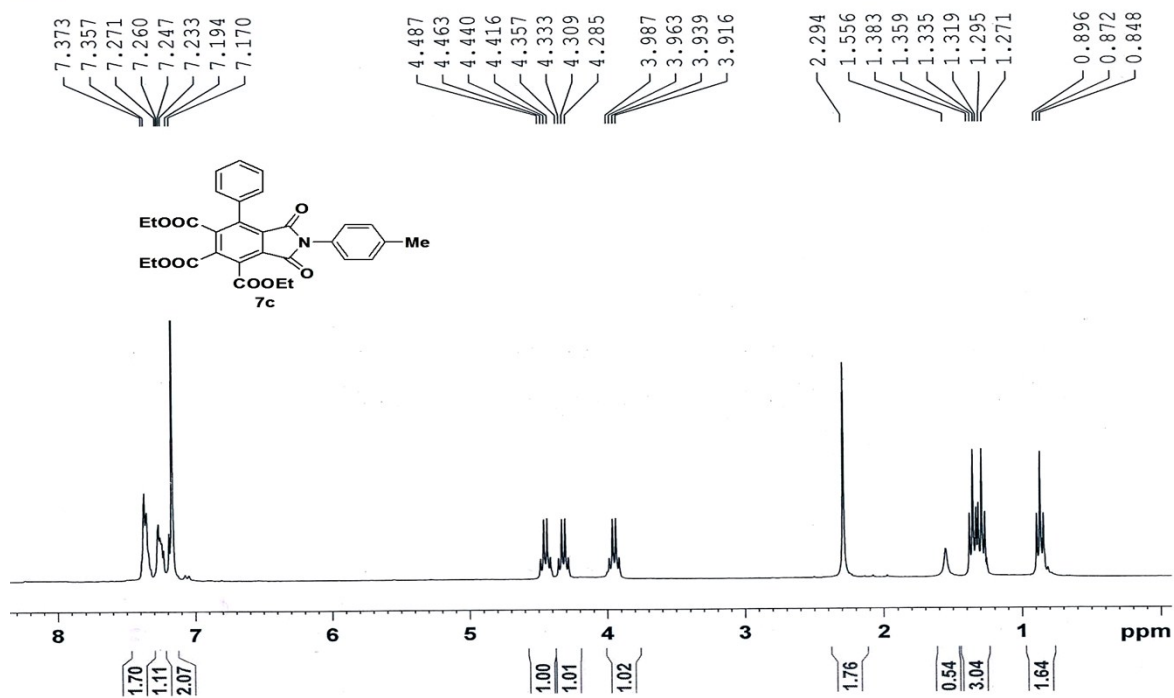

300 MHz NMR Machine; Department of Chemistry; University of Calcutta; SAP-CAS Program  
Sample:Subh-170;  $^{13}\text{C}$ ;  $\text{CDCl}_3$ ; Supervisor:Dr. D. K. Maiti; Dt:1/08/15

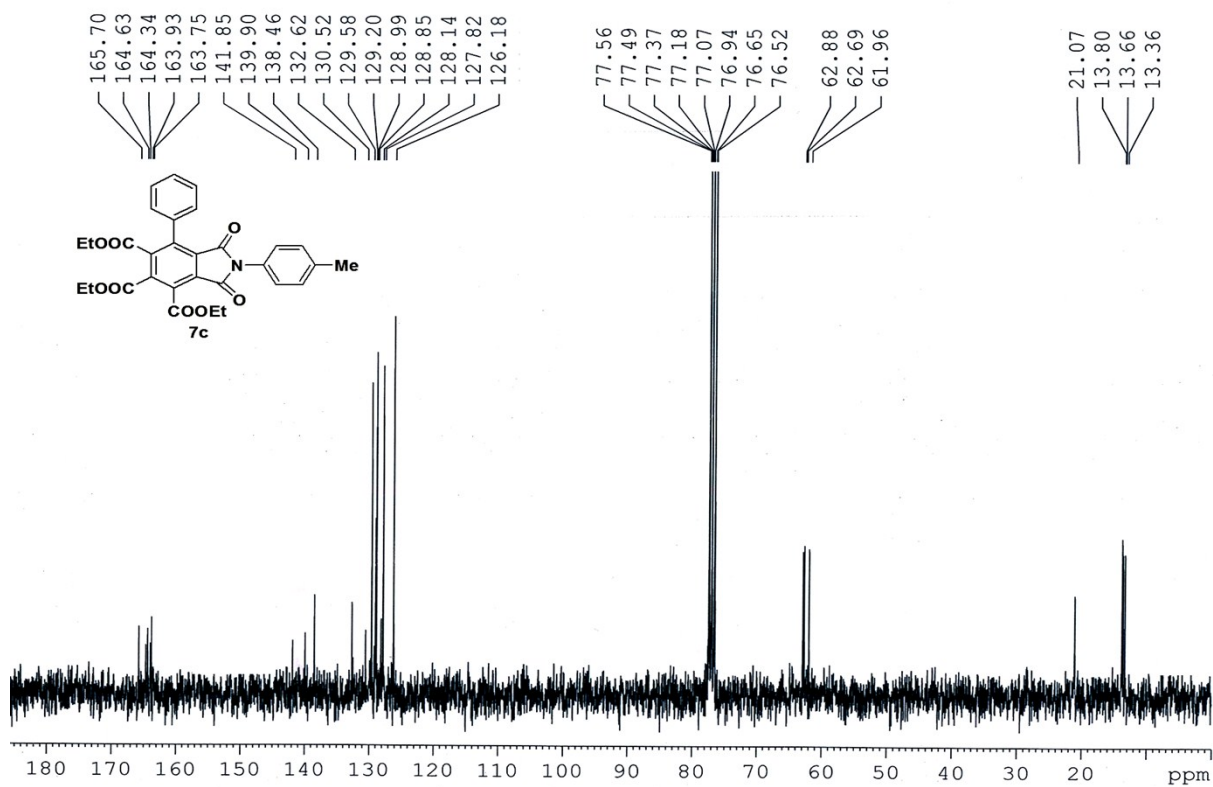

# $^1\text{H}$ & $^{13}\text{C}$ NMR of 7d

300 MHz NMR Machine; Department of Chemistry; University of Calcutta; SAP-CAS Program  
Sample:Subh-175(2); PMR;  $\text{CDCl}_3$ ; Supervisor: Prof. D. K. Maiti, Dt:19/08/15

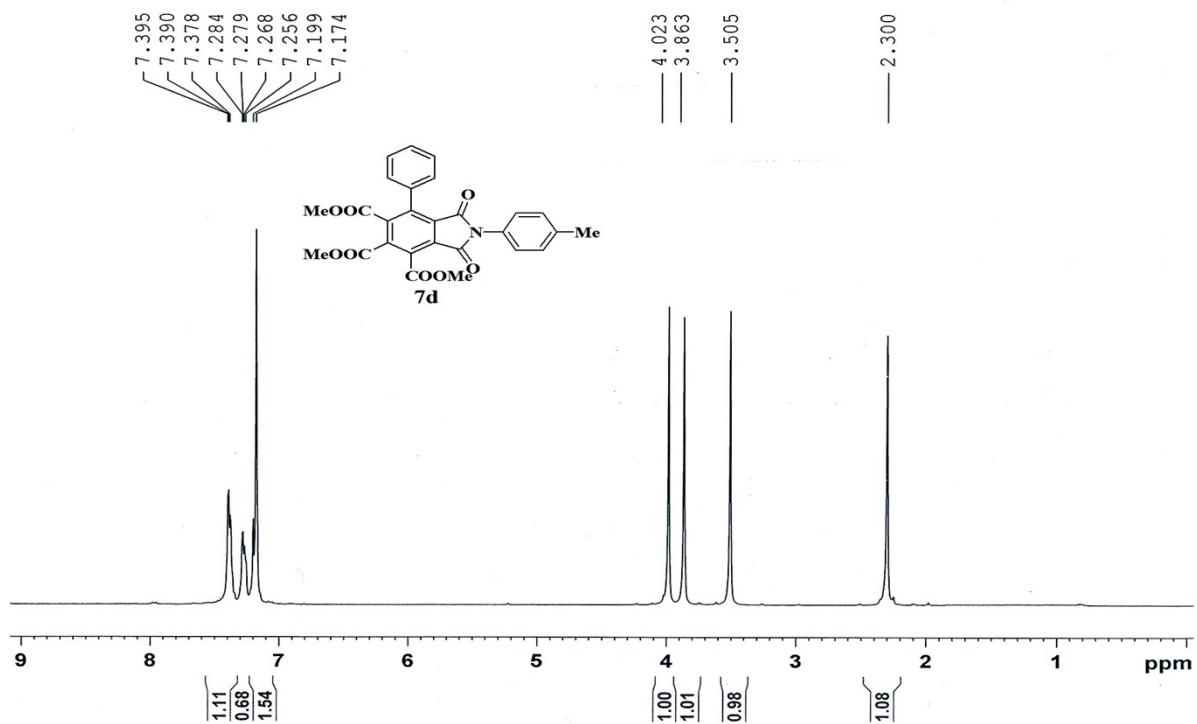

300 MHz NMR Machine; Department of Chemistry; University of Calcutta; SAP-CAS Program  
Sample:Subh-175(2);  $\text{CDCl}_3$ ; Supervisor:Dr. D. K. Maiti;Dt:19/08/15

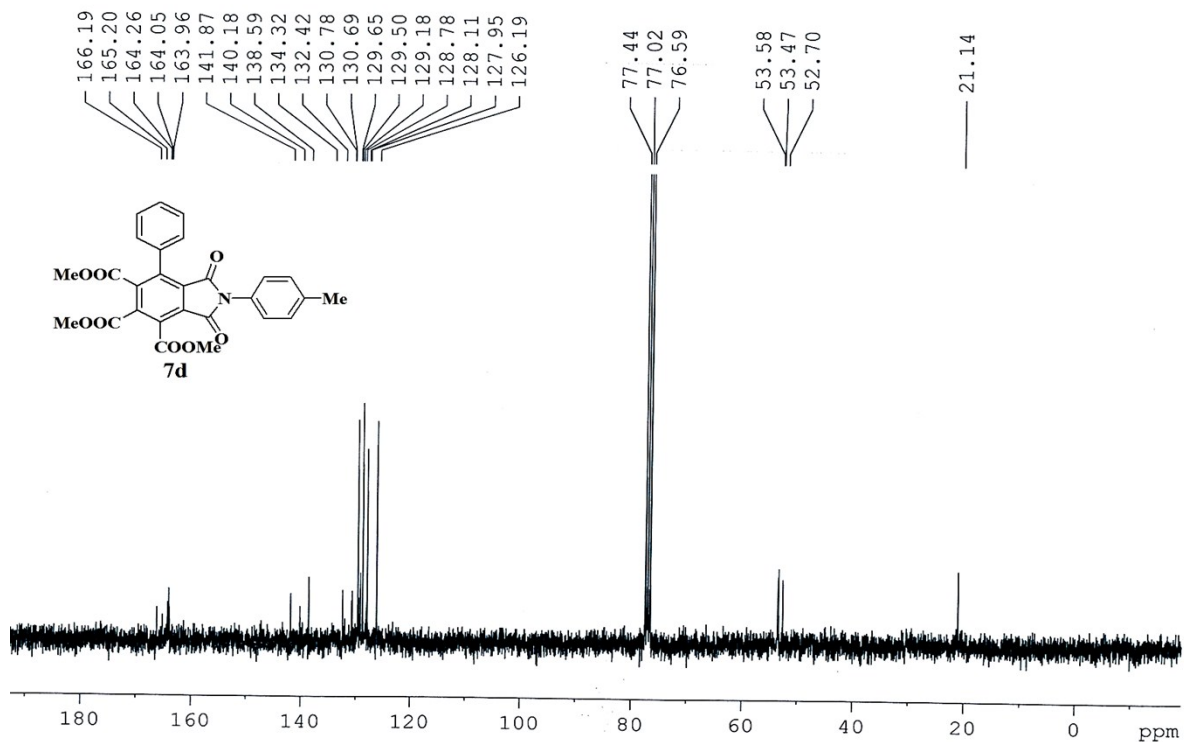



# $^1\text{H}$ & $^{13}\text{C}$ NMR of **7e**

300 MHz NMR Machine; Department of Chemistry; University of Calcutta; SAP-CAS Program  
 Sample:Subh-174; PMR; CDCl<sub>3</sub>; Supervisor: Prof. D. K. Maiti, Dt:12/08/15

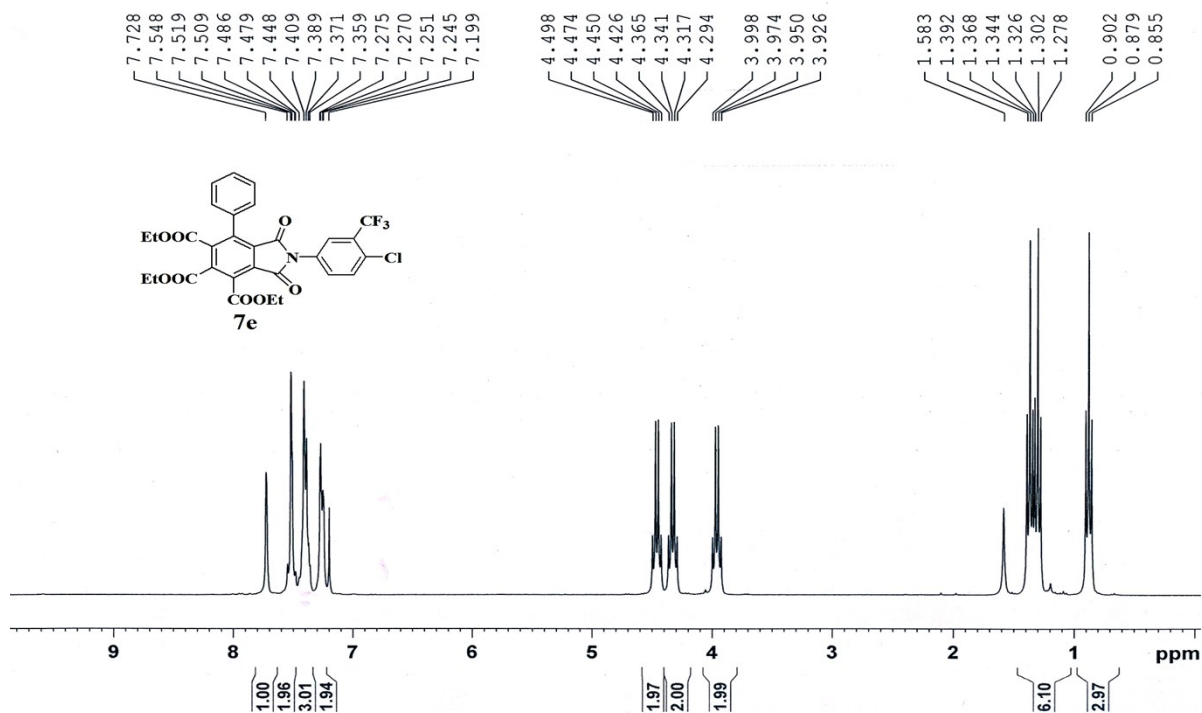

300 MHz NMR Machine; Department of Chemistry; University of Calcutta; SAP-CAS Program  
 Sample:Subh-174;  $^{13}\text{C}$ ; CDCl<sub>3</sub>; Supervisor: Dr. D. K. Maiti; Dt:14/08/15

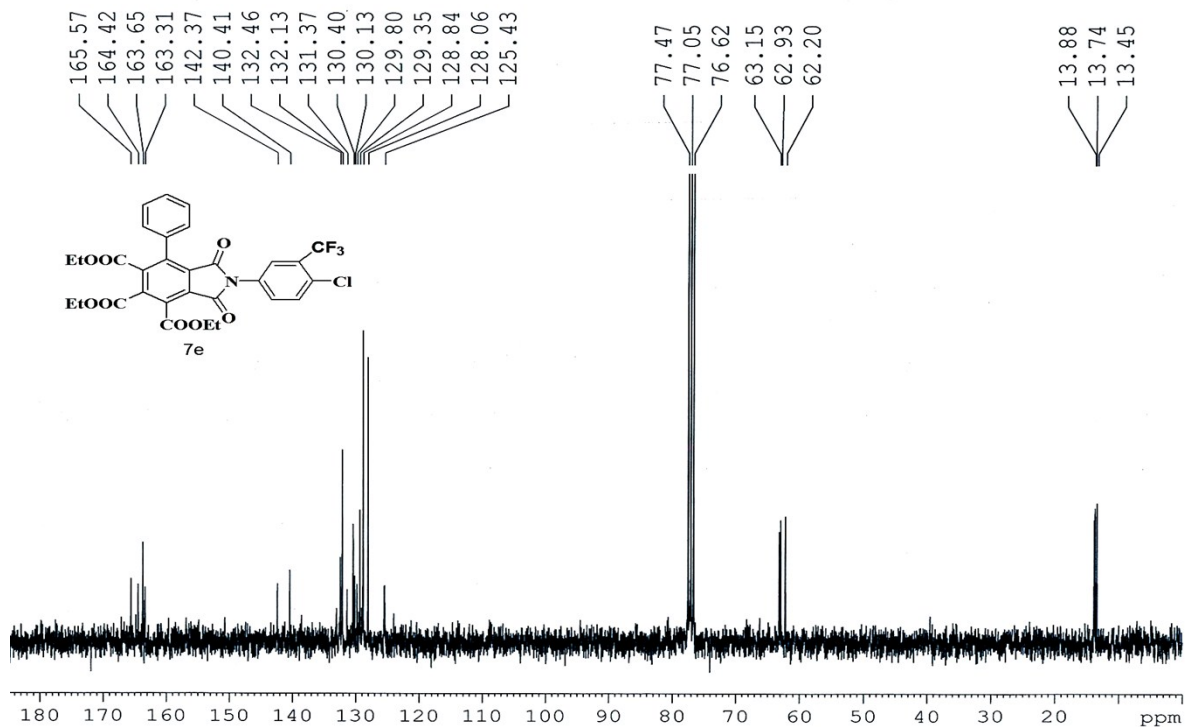

# $^1\text{H}$ & $^{13}\text{C}$ NMR of 7f

300 MHz NMR Machine; Department of Chemistry; University of Calcutta; SAP-CAS Program  
Sample:Subh-173R; PMR; CDCl<sub>3</sub>; Supervisor: Prof. D. K. Maiti, Dt:17/08/15

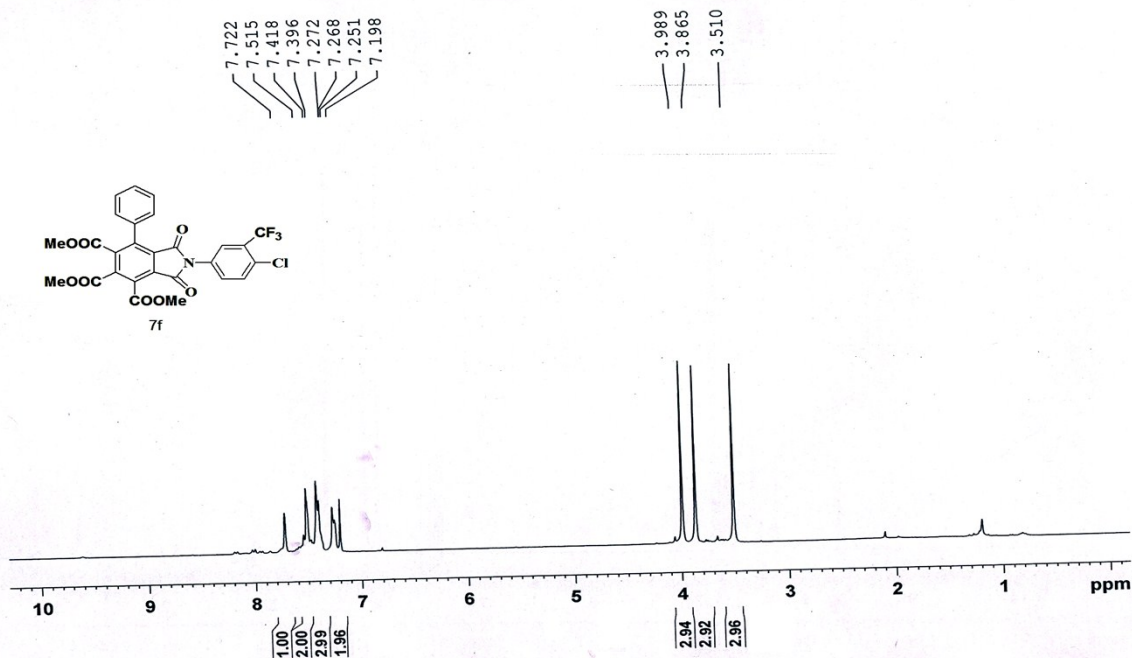

300 MHz NMR Machine; Department of Chemistry; University of Calcutta; SAP-CAS Program  
Sample:Subh-173R;  $^{13}\text{C}$ ; CDCl<sub>3</sub>; Supervisor: Dr. D. K. Maiti; Dt:17/08/15

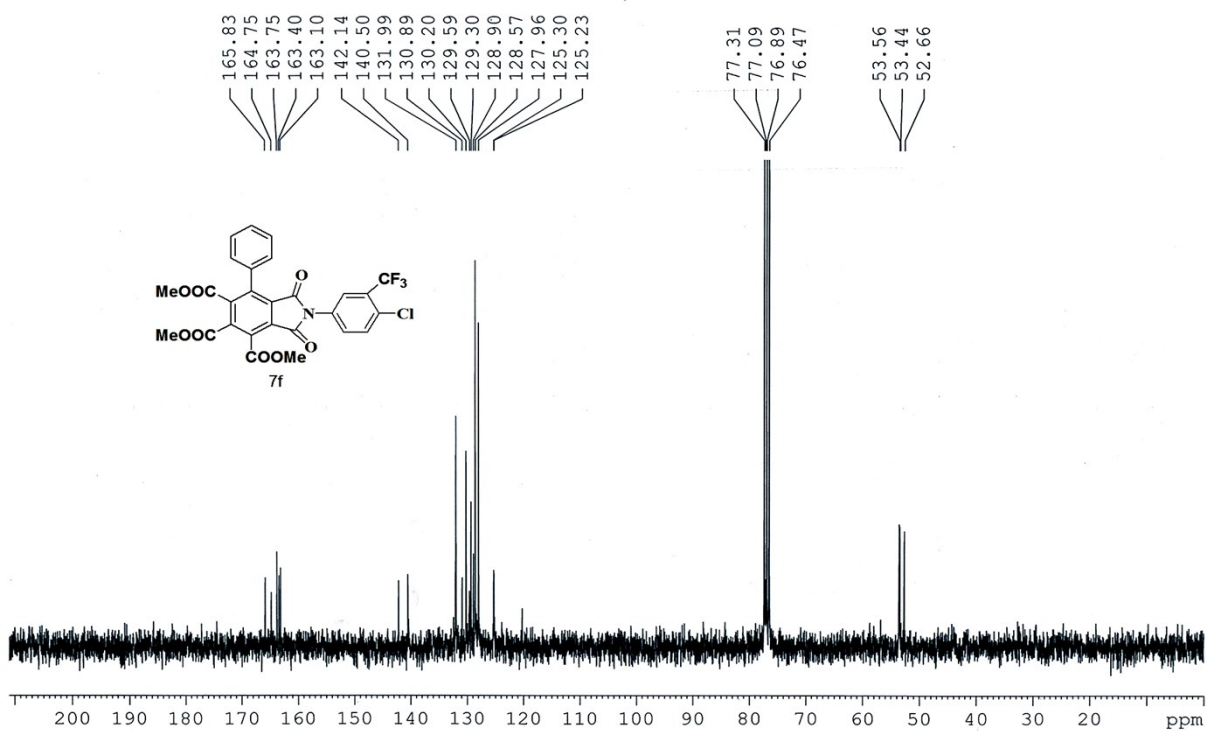

# $^1\text{H}$ & $^{13}\text{C}$ NMR of **7g**

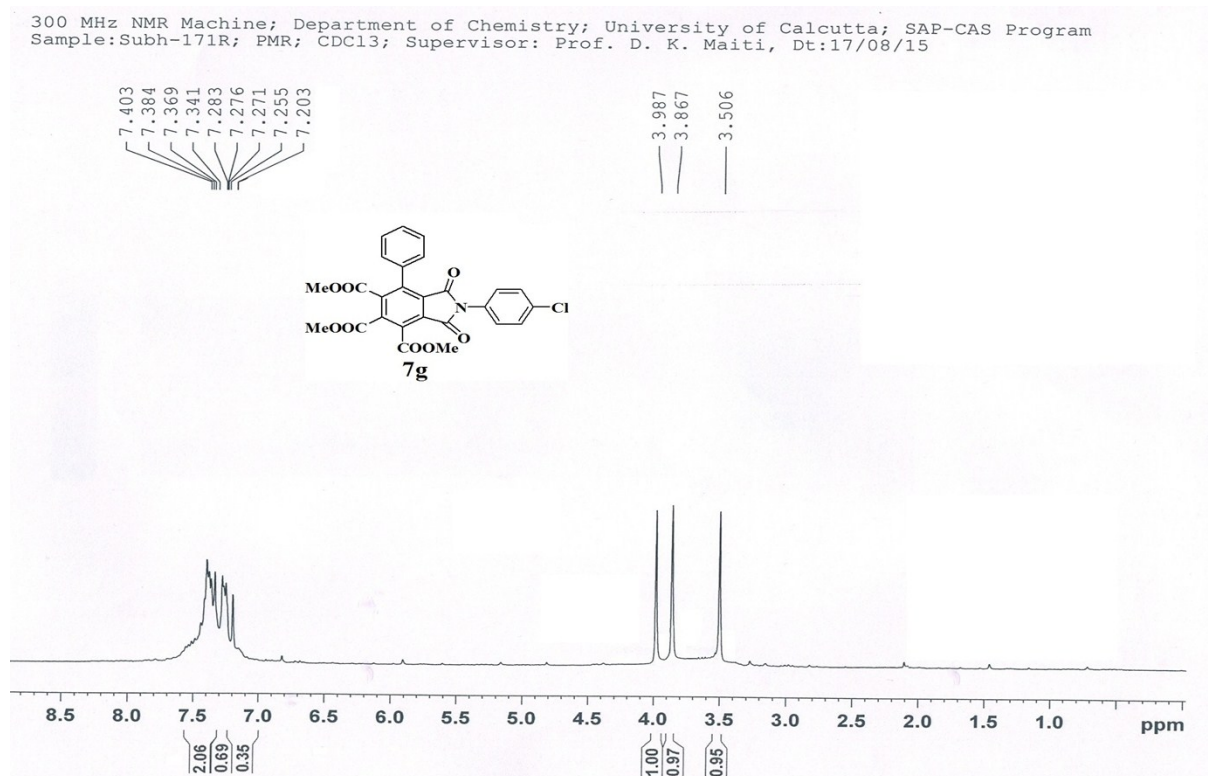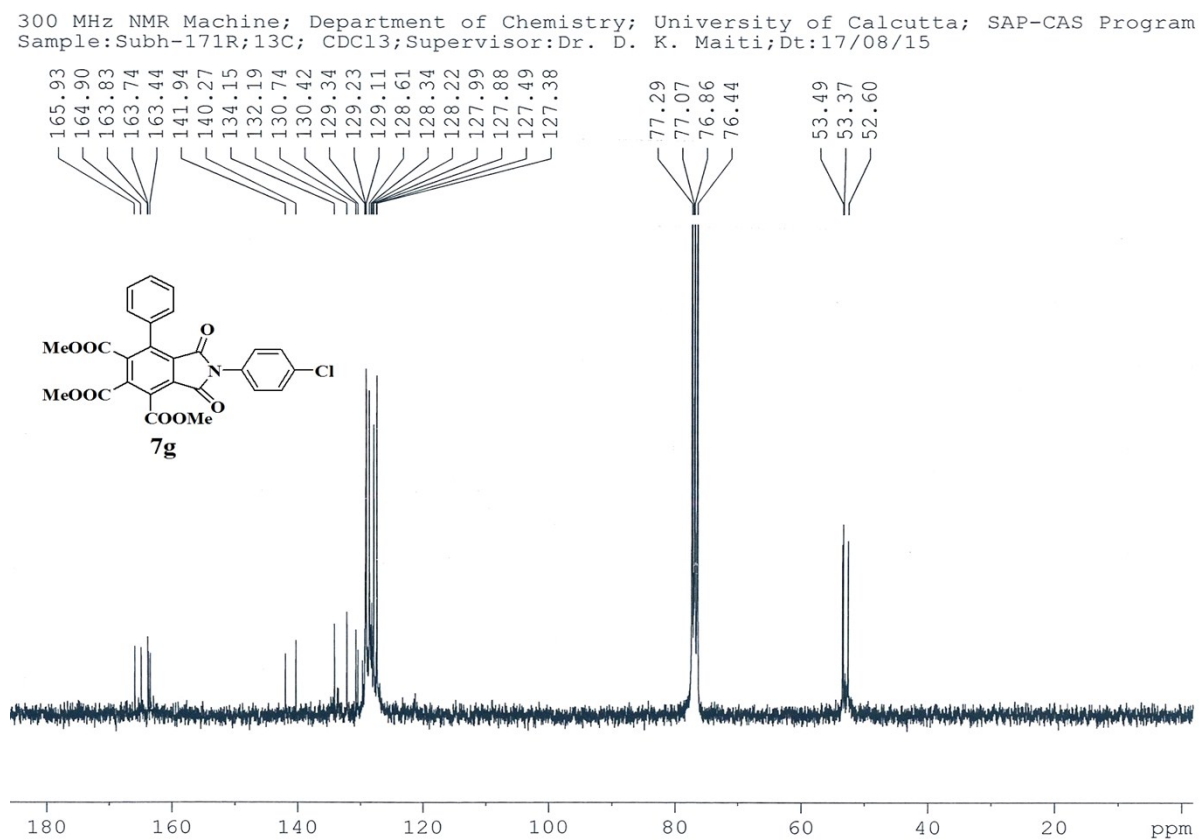

#### 4. Crystallographic data of compound 3e & 3k

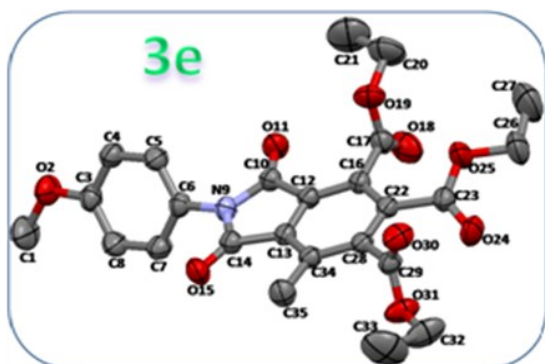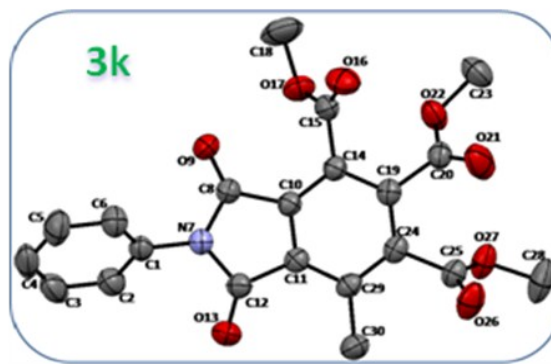

| Crystal parameters                                         | 3e                                                | 3k                                                        |
|------------------------------------------------------------|---------------------------------------------------|-----------------------------------------------------------|
| CCDC No.                                                   | 1436308                                           | 1436272                                                   |
| Empirical formula                                          | $C_{25}H_{25}NO_9$                                | $C_{21}H_{17}NO_8$                                        |
| Formula weight                                             | 483.46                                            | 411.36                                                    |
| Crystal size/mm                                            | 0.92x 0.41 x 0.07                                 | 0.32x 0.16 x 0.05                                         |
| Crystal system                                             | Monoclinic                                        | Triclinic                                                 |
| Space group                                                | $P2_1/c$                                          | $P-1$                                                     |
| a /Å                                                       | 23.7419(9)                                        | 8.133(3)                                                  |
| b /Å                                                       | 8.0217(3)                                         | 11.671(4)                                                 |
| c /Å                                                       | 31.6881(9)                                        | 11.708(3)                                                 |
| $\alpha$ /°                                                | 90.00                                             | 63.061(14)                                                |
| $\beta$ /°                                                 | 127.152(2)                                        | 84.432(14)                                                |
| $\gamma$ /°                                                | 90.00                                             | 75.914(14)                                                |
| Volume/Å <sup>3</sup>                                      | 4810.1(3)                                         | 960.9(5)                                                  |
| Z                                                          | 8                                                 | 2                                                         |
| D <sub>calc</sub> /gcm <sup>-3</sup>                       | 1.335                                             | 1.422                                                     |
| F(000)                                                     | 2032                                              | 428                                                       |
| $\mu$ MoK $\alpha$ /mm <sup>-1</sup>                       | 0.102                                             | 0.111                                                     |
| Temperature/K                                              | 298(2)                                            | 298(2)                                                    |
| R <sub>int</sub>                                           | 0.0367                                            | 0.0248                                                    |
| Range of h, k, l                                           | -26/28, -9/9, -37/36                              | -9/9, -13/13, -13/13                                      |
| $\theta$ min/max/°                                         | 1.08/25.00                                        | 1.95/25.00                                                |
| Reflections collected/unique/observed [ $I > 2\sigma(I)$ ] | 59544 / 8471/ 6526                                | 8531 / 3361/ 2729                                         |
| Data/restraints/ parameters                                | 8471/0/641                                        | 3361/0/275                                                |
| Goodness of fit on F <sup>2</sup>                          | 1.024                                             | 1.026                                                     |
| Final R indices [ $I > 2\sigma(I)$ ]                       | R <sub>1</sub> = 0.0506, wR <sub>2</sub> = 0.1259 | R <sub>1</sub> = 0.0506, 0.0405, wR <sub>2</sub> = 0.1108 |
| R indices (all data)                                       | R <sub>1</sub> = 0.0671, wR <sub>2</sub> = 0.1408 | R <sub>1</sub> = 0.0671, 0.0498, wR <sub>2</sub> = 0.1200 |

## 5. DLS study of the reaction in water medium

Above the CMC concentration, suitable surfactants can generate an organized media in water. Inside of the surfactant-assembled spherical micelle is sufficiently lipophilic in nature and makes both organic substrates and reagents soluble. It was confirmed by DLS (Dynamic Light Scattering) experiment of the solutions contain surfactant and solvent as well as the reaction mixture and the details result is given in the Table S1.

**Table S1.** DLS data of the reaction mixture in presence of DMAP

| Composition      | Time (min) | Size (r.nm) | Width (r.nm) |
|------------------|------------|-------------|--------------|
| Reaction mixture | 0          | 72.8        | 15.2         |
| Reaction mixture | 5          | 122.8       | 28.3         |
| Reaction mixture | 10         | 338.3       | 62.9         |
| Reaction mixture | 15         | 472.9       | 92.9         |
| Reaction mixture | 20         | 599.8       | 117.4        |
| Reaction mixture | 25         | 700.0       | 171.2        |
| Reaction mixture | 30         | 945.0       | 449.3        |

### DLS data with DMAP

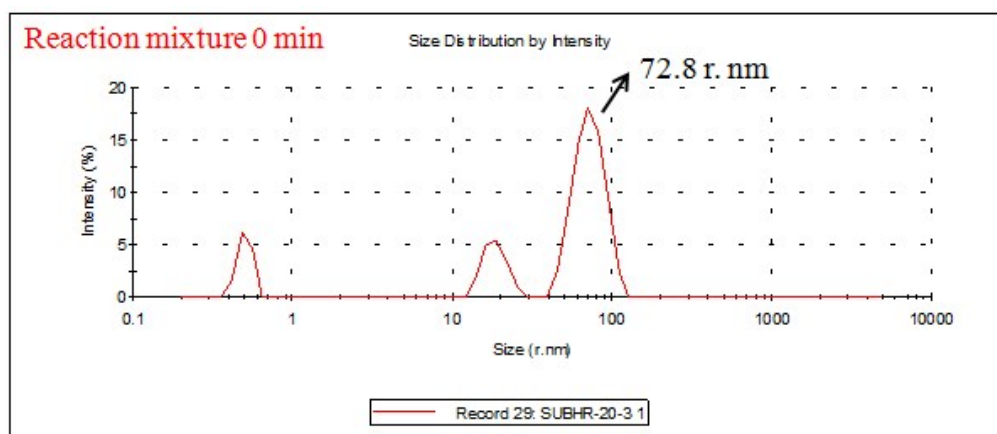

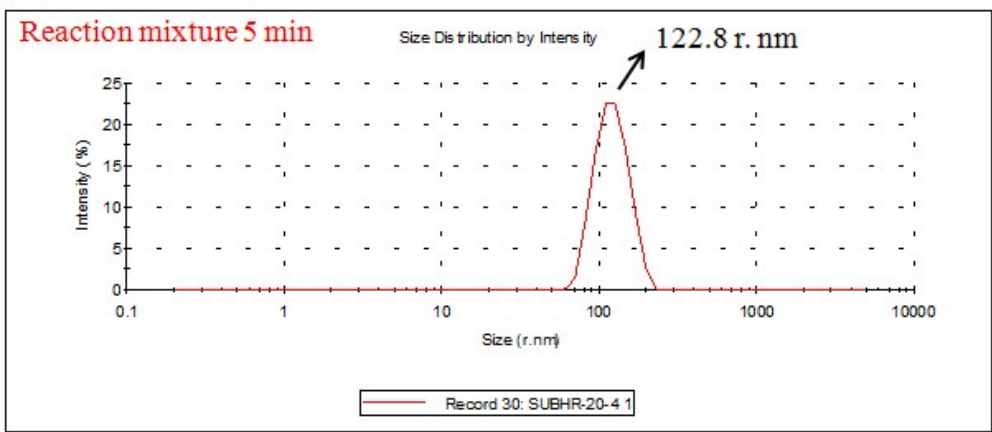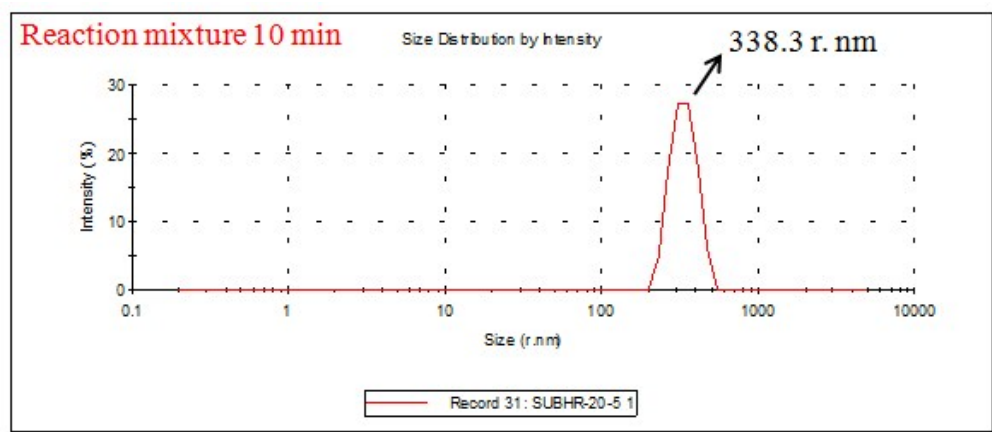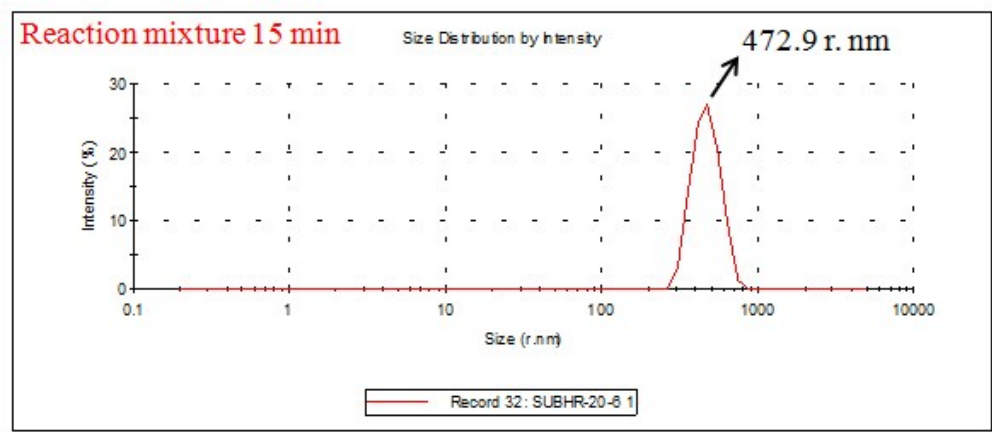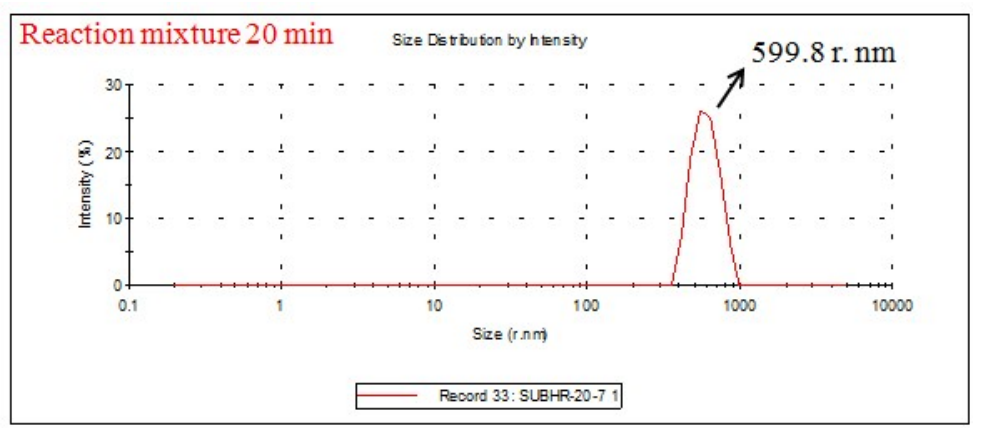

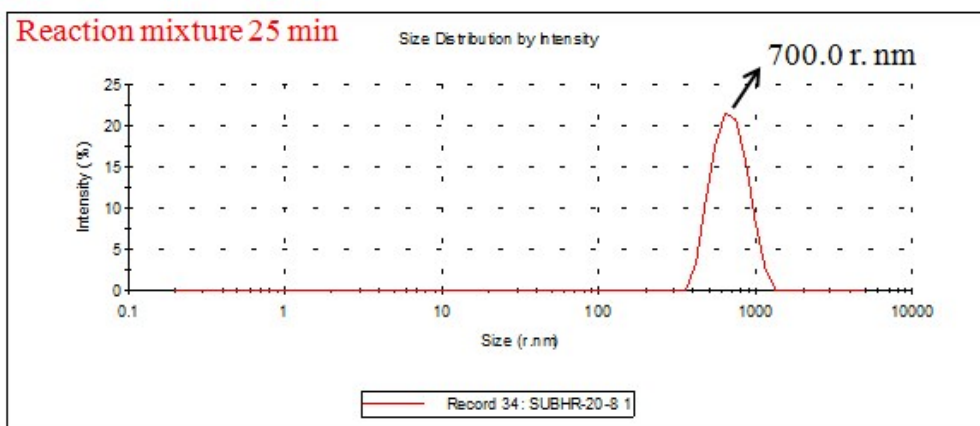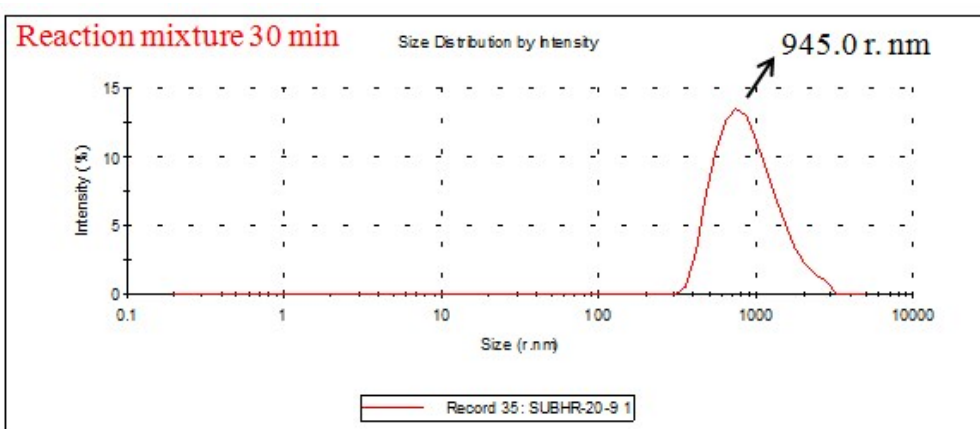

**Table S2.** DLS data of the reaction mixture in presence of  $\text{NEt}_3$

| Composition      | Time (min) | Size (r.nm) | Width (r.nm) |
|------------------|------------|-------------|--------------|
| Reaction mixture | 0          | 42.5        | 5.5          |
| Reaction mixture | 5          | 81.7        | 17.7         |
| Reaction mixture | 10         | 158.4       | 27.7         |
| Reaction mixture | 15         | 200.0       | 33.2         |
| Reaction mixture | 20         | 253.0       | 46.3         |
| Reaction mixture | 25         | 337.8       | 54.2         |
| Reaction mixture | 30         | 309.4       | 91.4         |
| Reaction mixture | 35         | 157.8       | 50.6         |

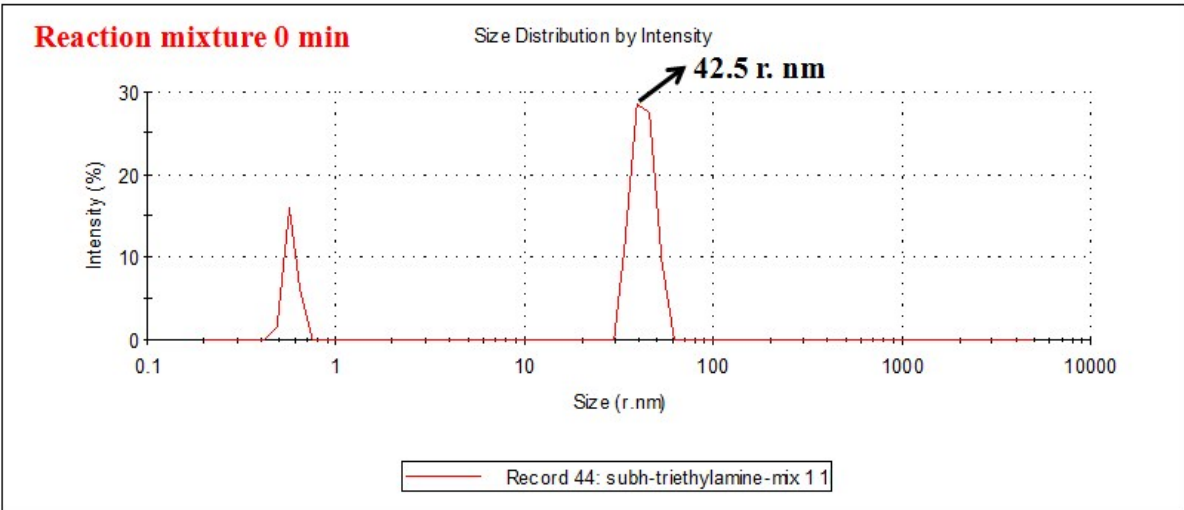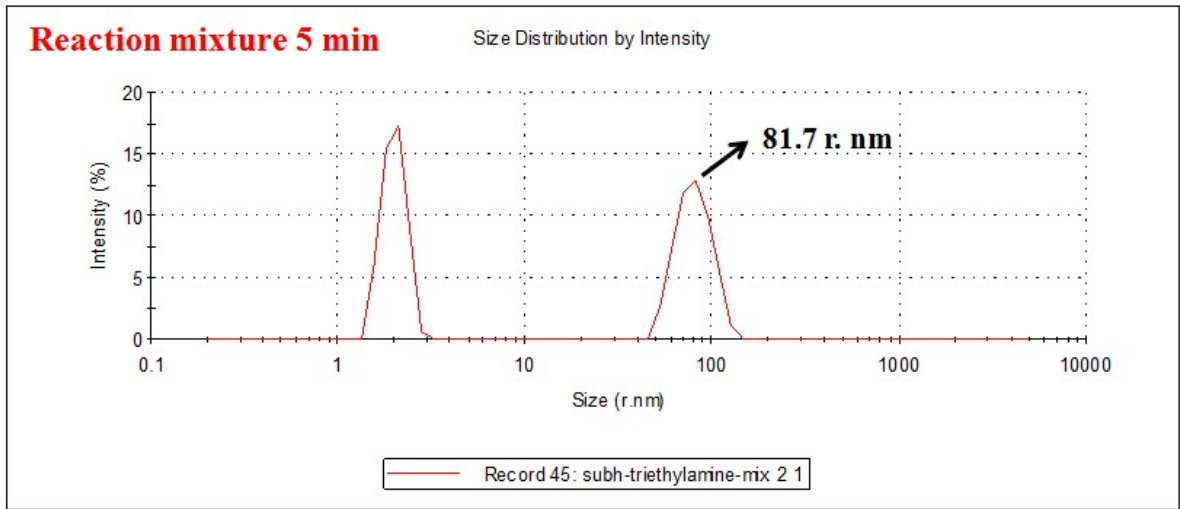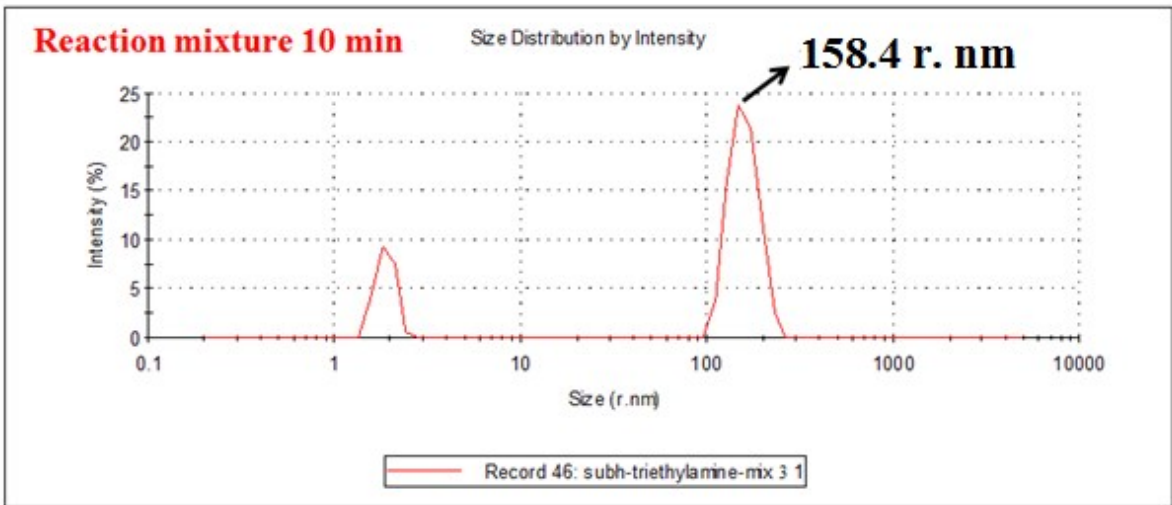



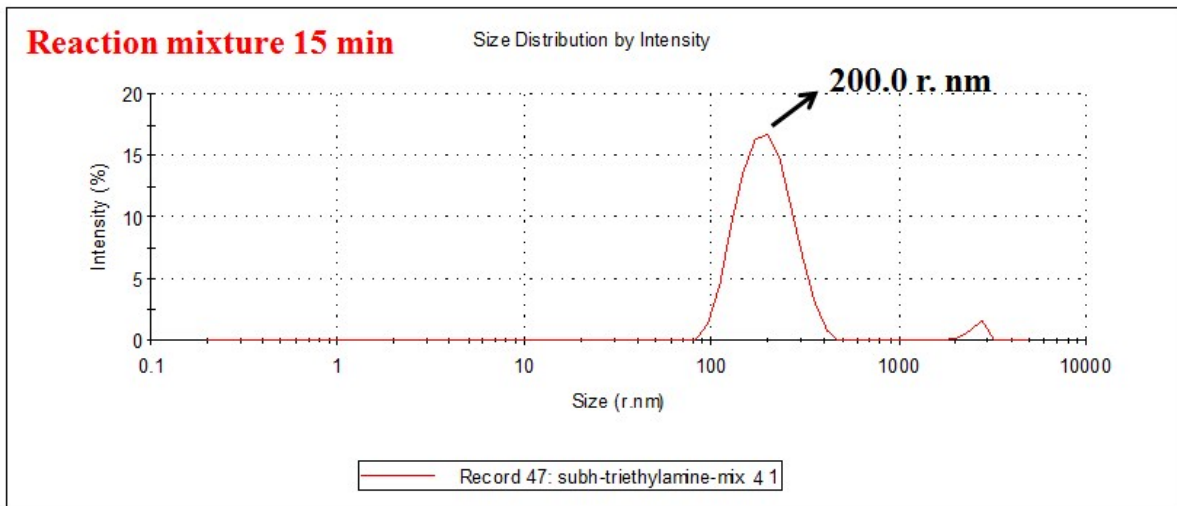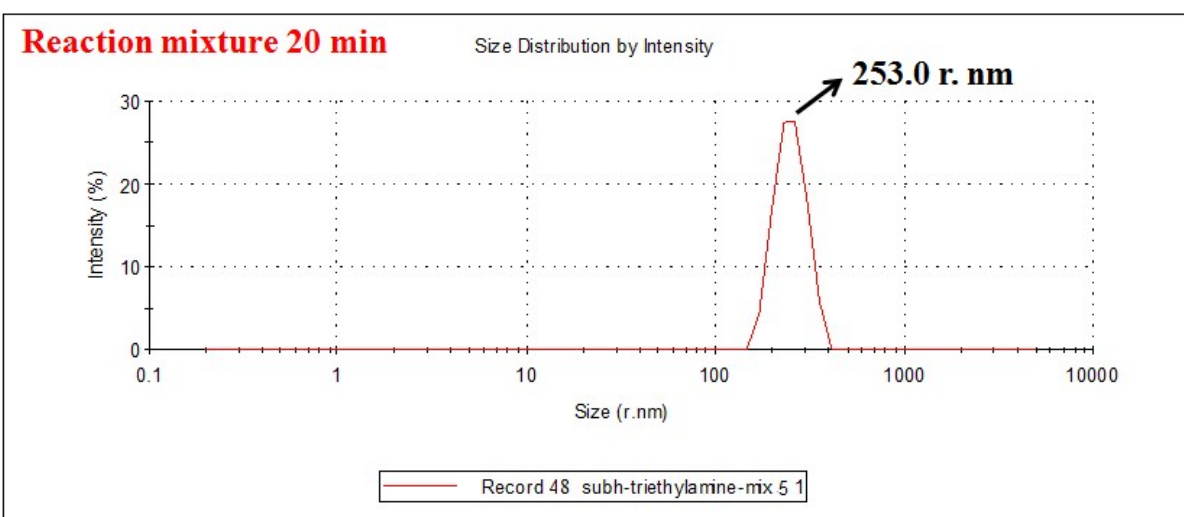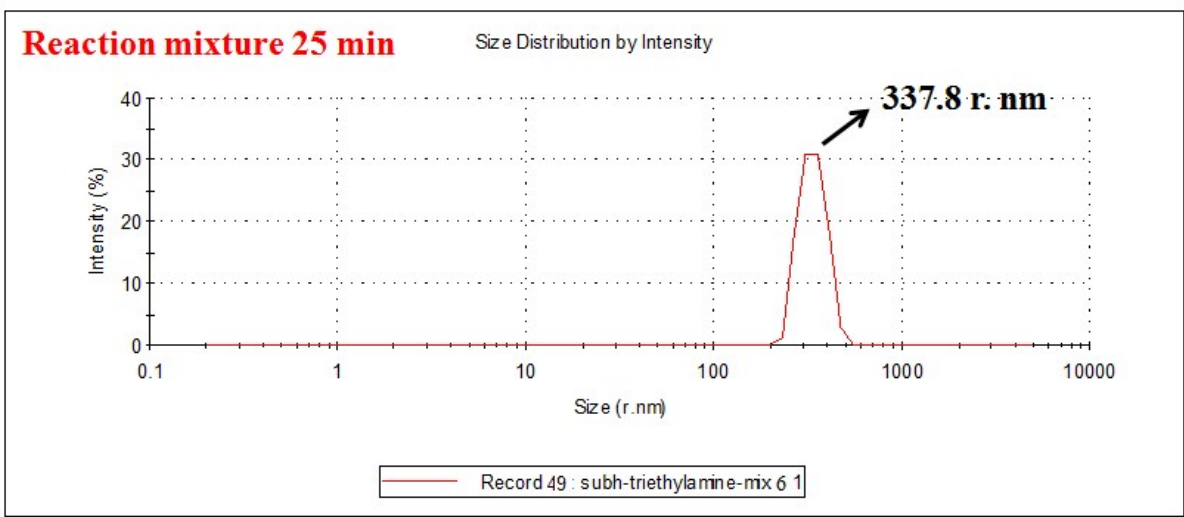

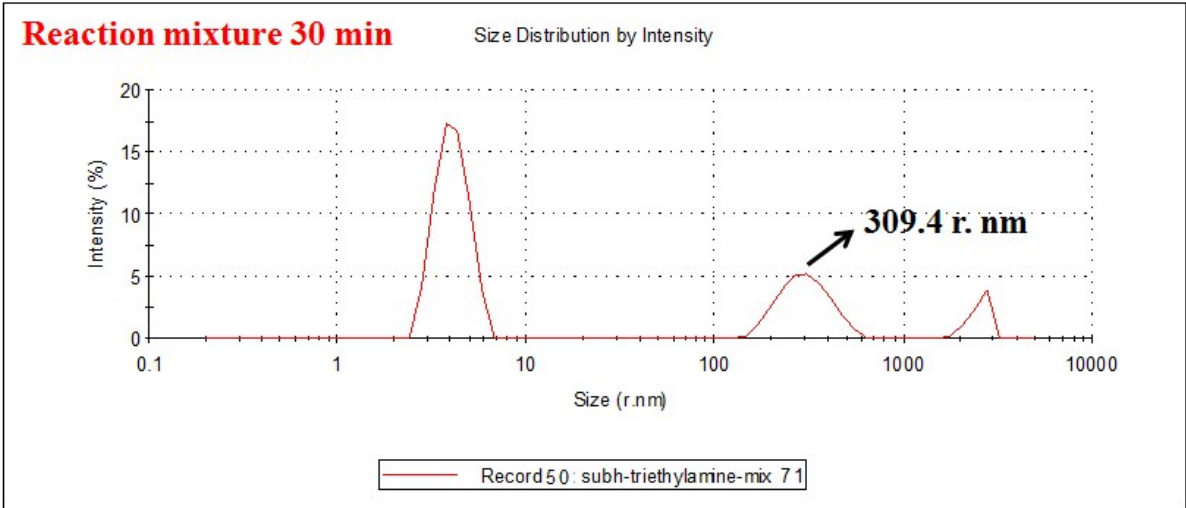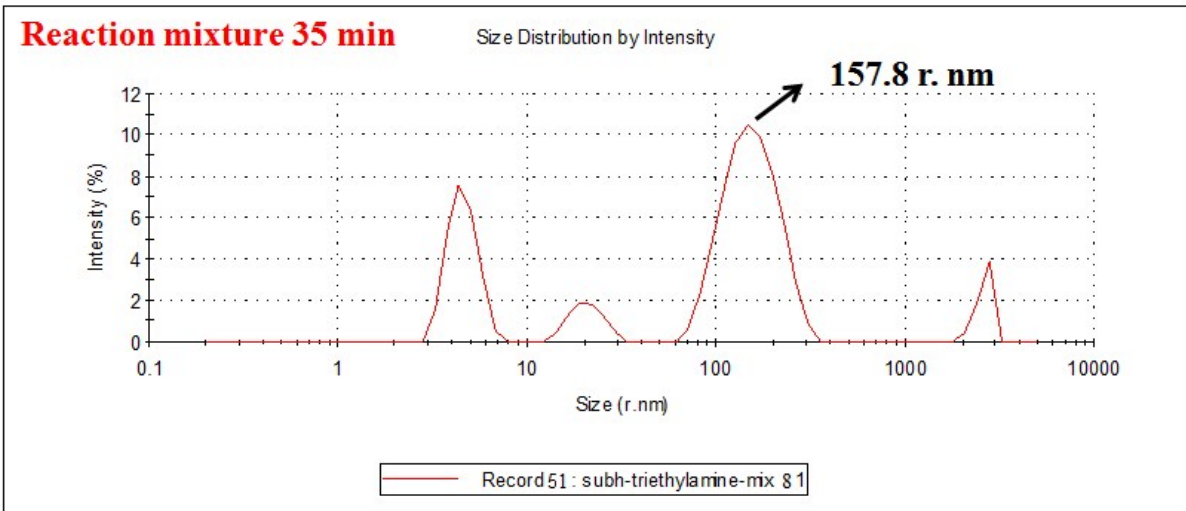

**Table S3.** DLS data of the reaction mixture in presence of pyridine

| Composition      | Time (min) | Size (r.nm) | Width (r.nm) |
|------------------|------------|-------------|--------------|
| Reaction mixture | 0          | 78.2        | 15.3         |
| Reaction mixture | 5          | 97.8        | 15.9         |
| Reaction mixture | 10         | 107.0       | 22.3         |
| Reaction mixture | 15         | 170.0       | 43.5         |
| Reaction mixture | 20         | 324.3       | 45.1         |
| Reaction mixture | 25         | 344.0       | 48.2         |
| Reaction mixture | 30         | 362.6       | 48.7         |
| Reaction mixture | 35         | 405.2       | 63.0         |
| Reaction mixture | 40         | 439.9       | 70.8         |
| Reaction mixture | 45         | 491.6       | 77.4         |
| Reaction mixture | 50         | 624.8       | 126.2        |
| Reaction mixture | 55         | 678.5       | 146.2        |
| Reaction mixture | 60         | 806.4       | 194.6        |

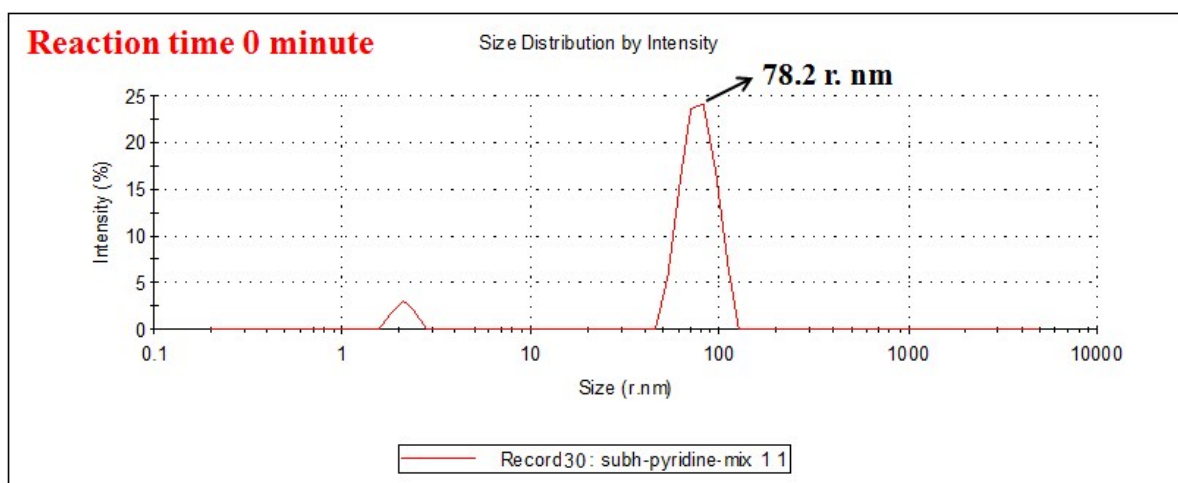

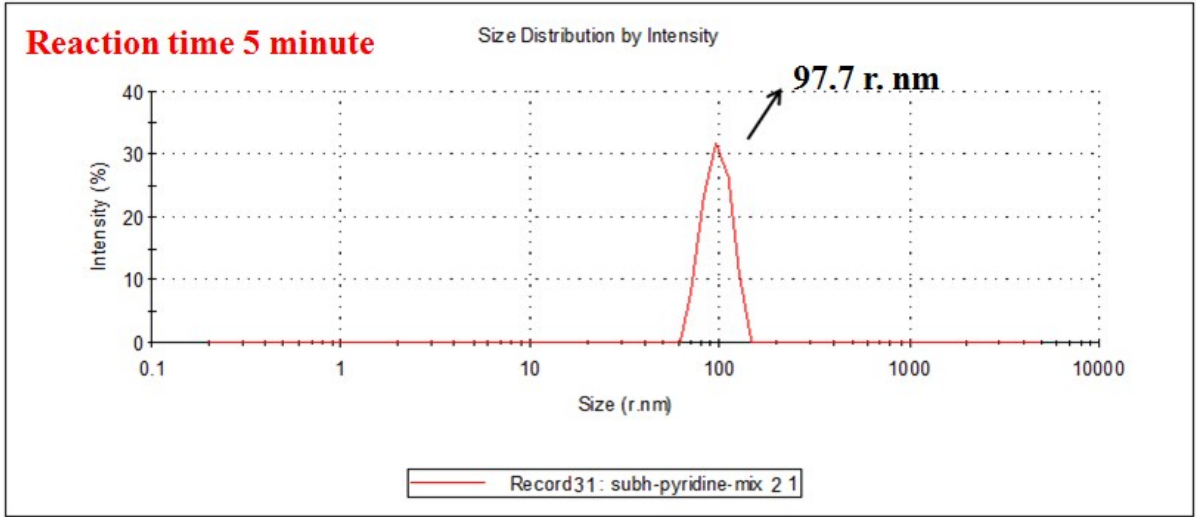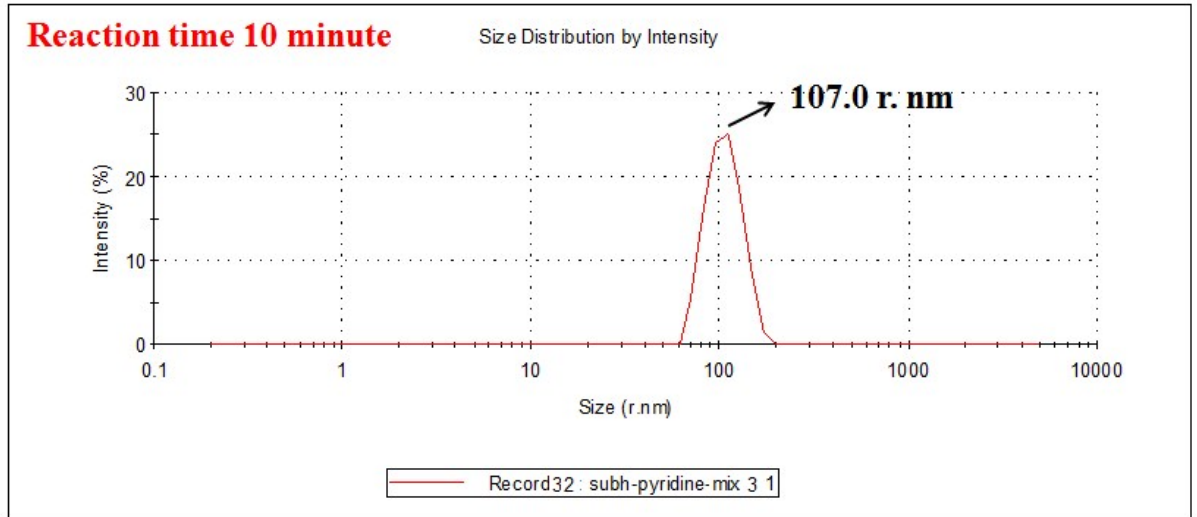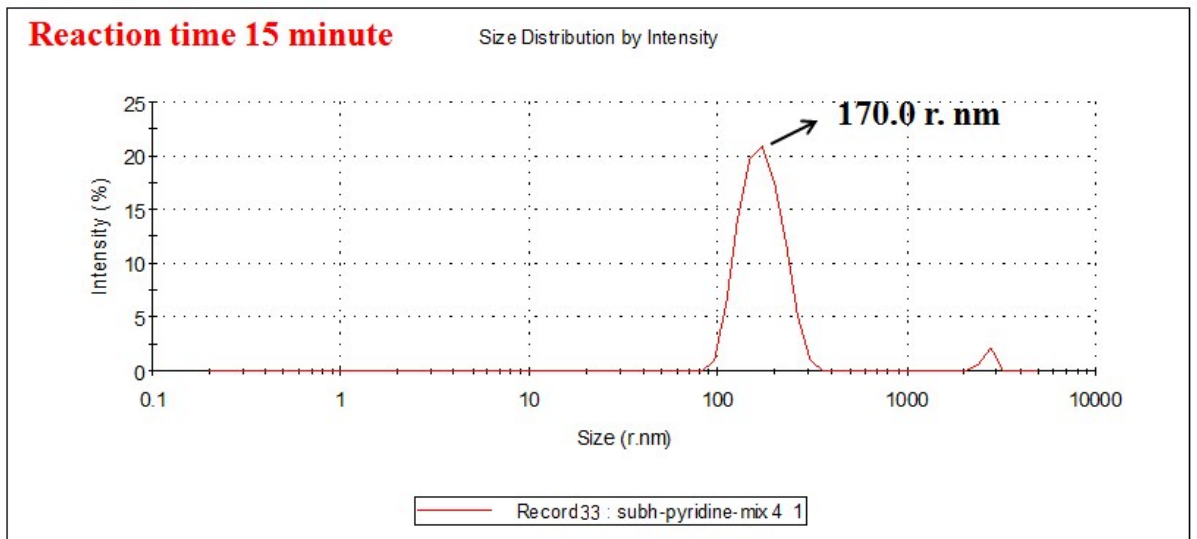

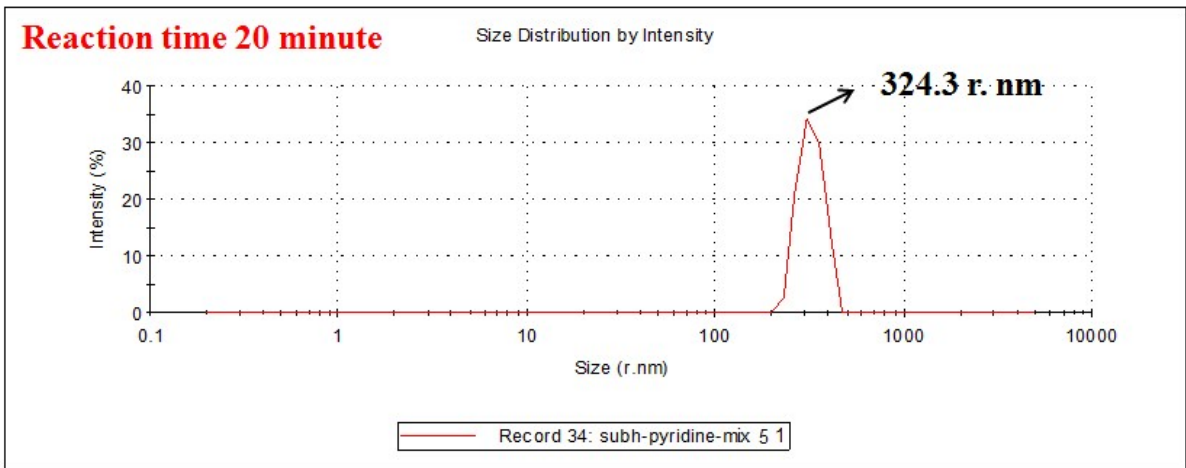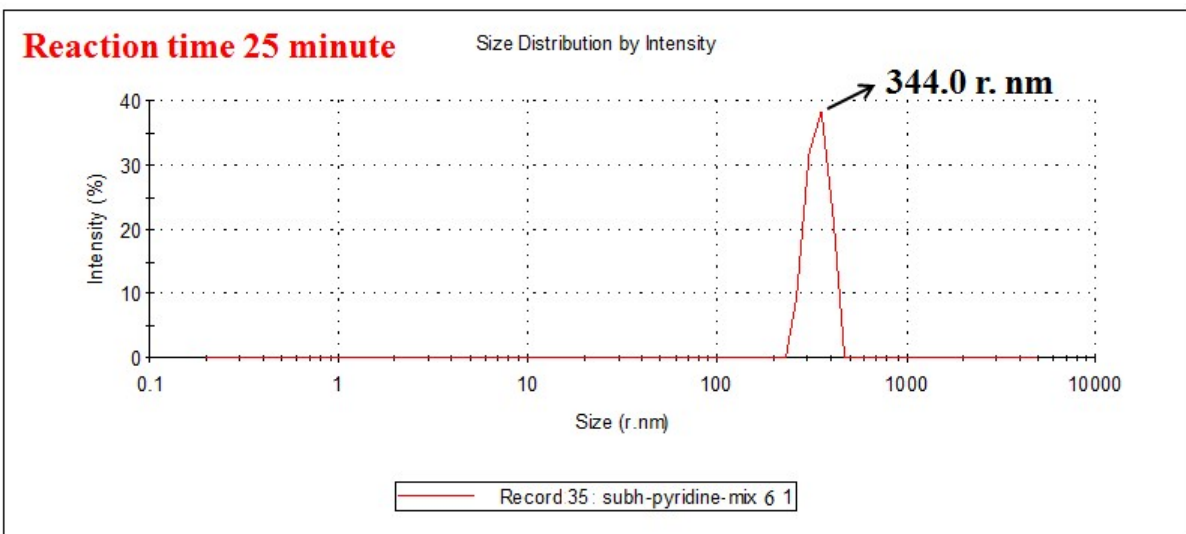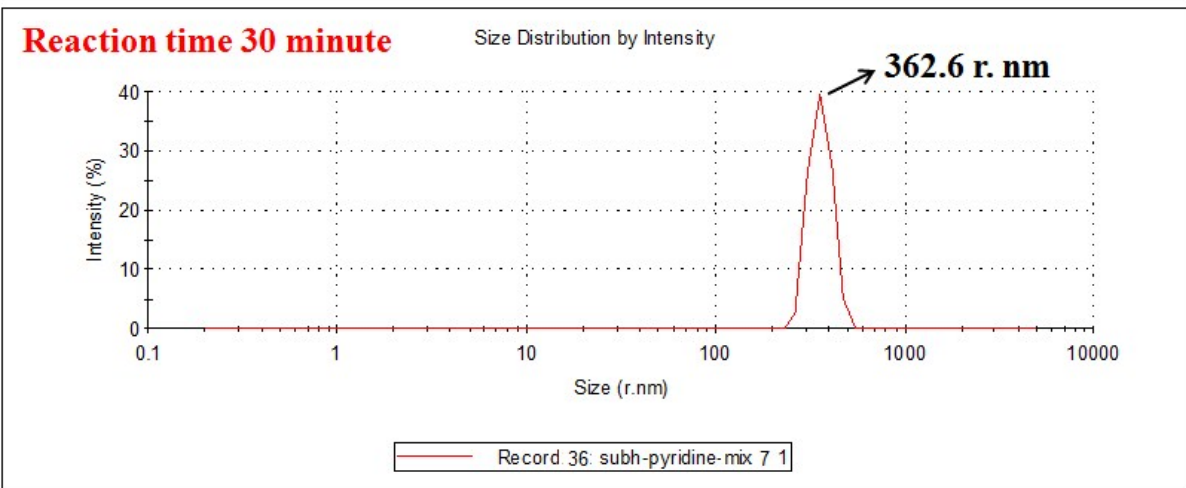

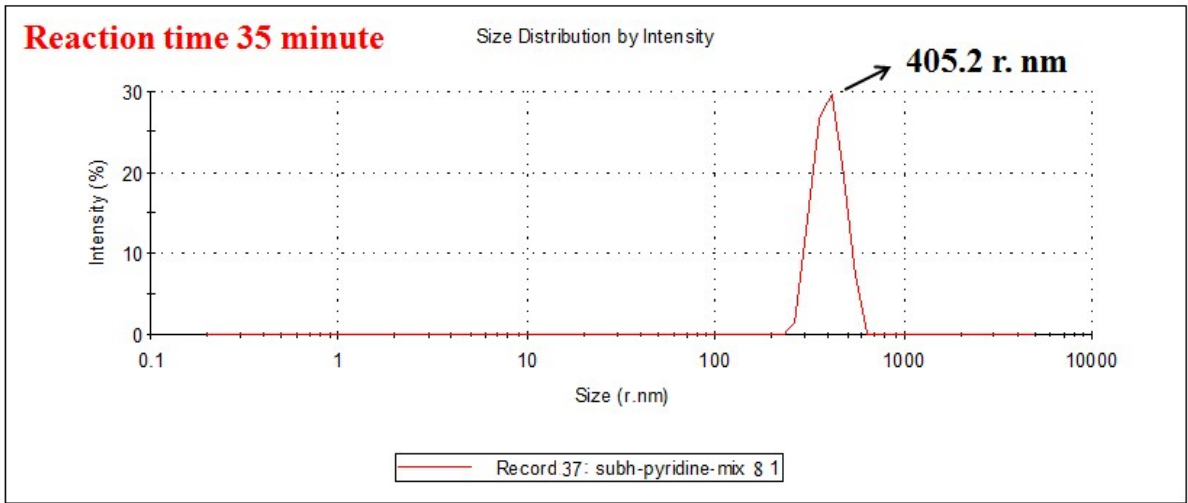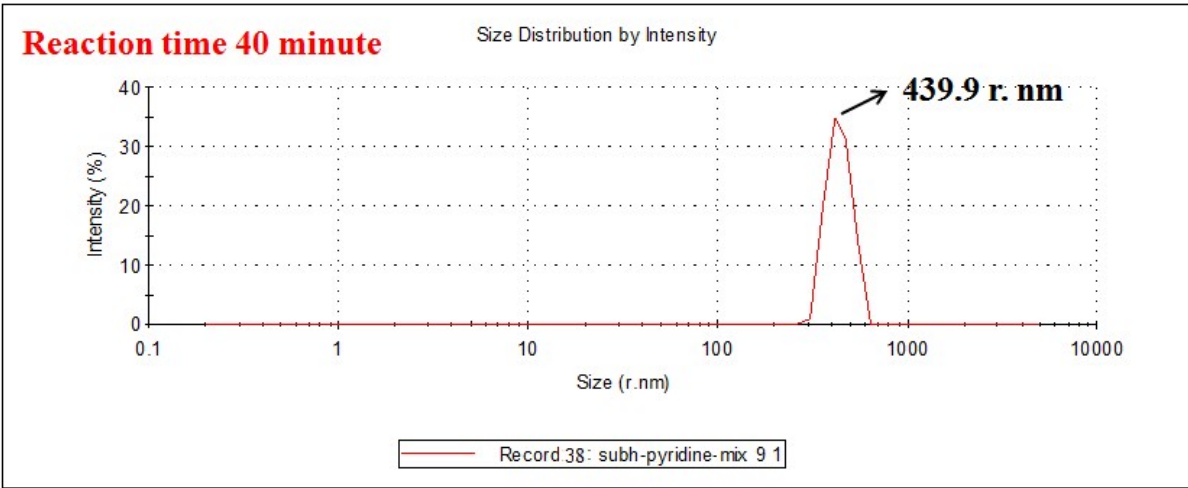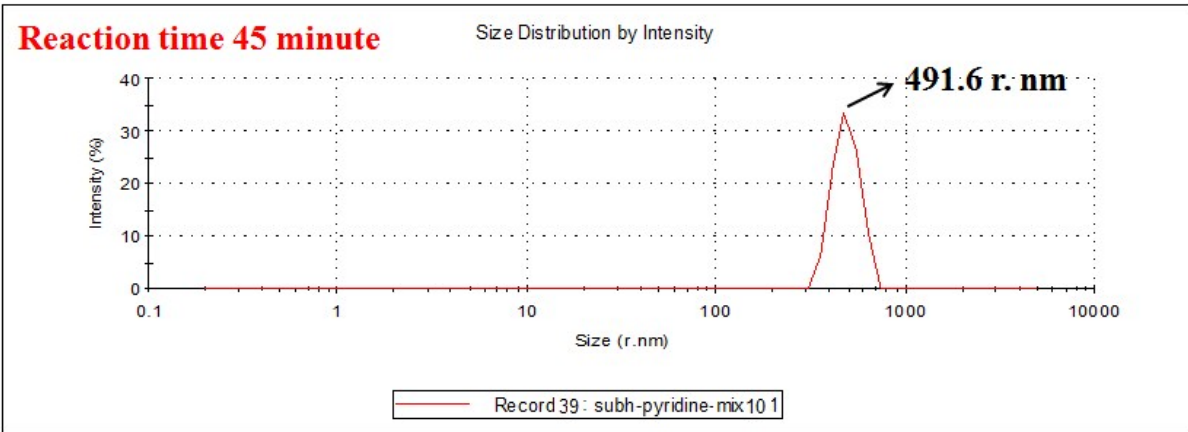

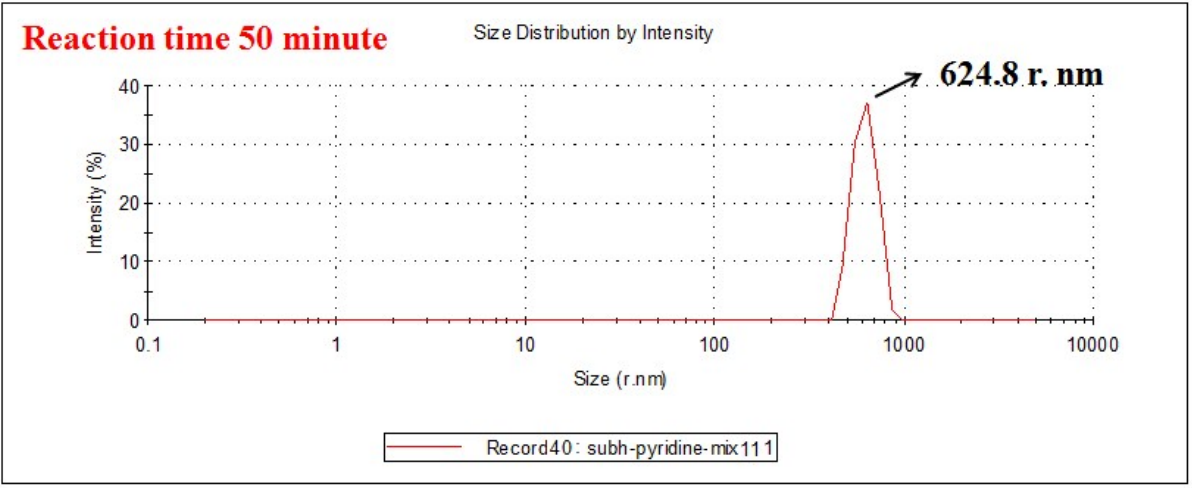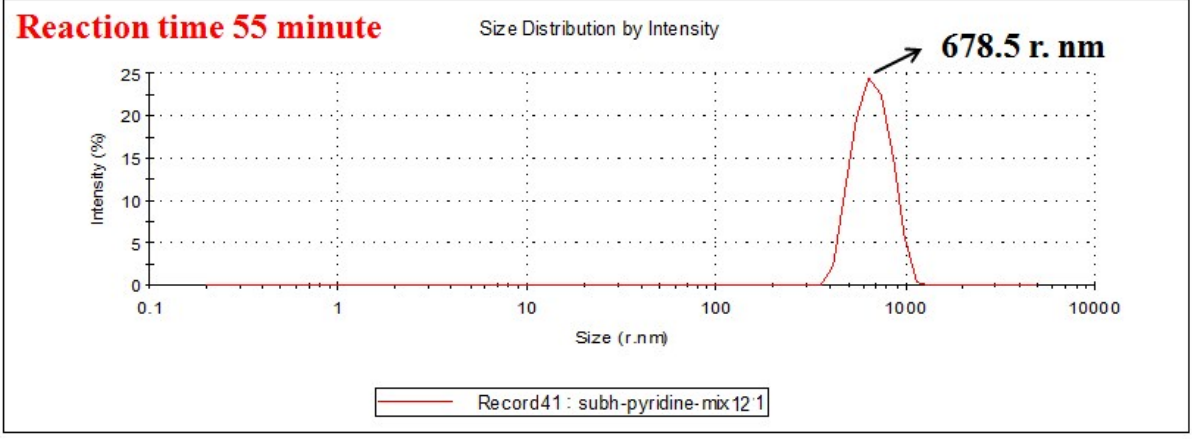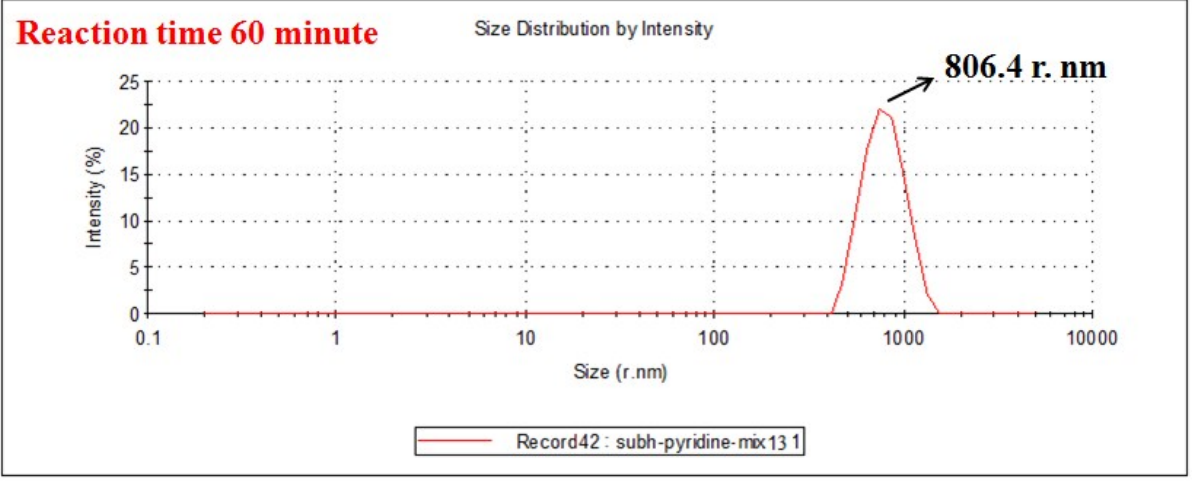

Supplement: c6gc00367b1.pdf [file c6gc00367b1.pdf]
